# Supplementary material for: Aquatic quality watch informed by communities (AQWIC) facilitating the adoption of low-cost sensor systems for underserved communities: a review and tutorial
Source: Royal Society of Chemistry journal article supplement (doi:10.1039/d4va00332b), 2025-01-01
Supplement: d4va00332b1.xlsx [file d4va00332b1.xlsx]

## Sheet: All_Lit_Reviewed
Publication Type	Authors	Book Authors	Book Editors	Book Group Authors	Author Full Names	Book Author Full Names	Group Authors	Article Title	Source Title	Book Series Title	Book Series Subtitle	Language	Document Type	Conference Title	Conference Date	Conference Location	Conference Sponsor	Conference Host	Author Keywords	Keywords Plus	Abstract	Addresses	Affiliations	Reprint Addresses	Email Addresses	Researcher Ids	ORCIDs	Funding Orgs	Funding Name Preferred	Funding Text	Cited References	Cited Reference Count	Times Cited, WoS Core	Times Cited, All Databases	180 Day Usage Count	Since 2013 Usage Count	Publisher	Publisher City	Publisher Address	ISSN	eISSN	ISBN	Journal Abbreviation	Journal ISO Abbreviation	Publication Date	Publication Year	Volume	Issue	Part Number
J	Wang, YC; Rajib, SMSM; Collins, C; Grieve, B				Wang, Youchao; Rajib, S. M. Shariar Morshed; Collins, Chris; Grieve, Bruce			Low-Cost Turbidity Sensor for Low-Power Wireless Monitoring of Fresh-Water Courses	IEEE SENSORS JOURNAL			English	Article						Turbidity measurement; turbidity sensors; fresh water quality; NTU; low cost; low power; Internet-of-Things (IoT); wireless		This paper reports on a low-cost turbidity sensor design for continuous on-line water quality monitoring applications. The measurement of turbidity by agricultural and environmental scientists is restricted by the current cost and functionality of available commercial instruments. Although there are a number of low-cost turbidity sensors exploited within domestic 'white-goods', such as dishwasher…	[Wang, Youchao; Rajib, S. M. Shariar Morshed; Grieve, Bruce] Univ Manchester, Sch Elect & Elect Engn, Manchester M13 9PL, Lancs, England; [Collins, Chris] Univ Reading, Soil Res Ctr, Environm Sci Res Div, Reading RG6 6AB, Berks, England	N8 Research Partnership; University of Manchester; University of Reading	Grieve, B (corresponding author), Univ Manchester, Sch Elect & Elect Engn, Manchester M13 9PL, Lancs, England.	youchao.wang@student.manchester.ac.uk; smshariarmorshed.rajib@postgrad.manchester.ac.uk; c.d.collins@reading.ac.uk; bruce.grieve@manchester.ac.uk	, Chris/F-3858-2011; Grieve, Bruce/U-5324-2017	, Chris/0000-0002-8282-2803; Wang, Youchao/0000-0002-4197-8123; Grieve, Bruce/0000-0002-5130-3592	University of Manchester, U.K	University of Manchester, U.K	This work was supported by the University of Manchester, U.K. The associate editor coordinating the review of this paper and approving it for publication was Dr. Rosario Morello.		25	40	43	7	66	IEEE-INST ELECTRICAL ELECTRONICS ENGINEERS INC	PISCATAWAY	445 HOES LANE, PISCATAWAY, NJ 08855-4141 USA	1530-437X	1558-1748		IEEE SENS J	IEEE Sens. J.	2023-06-01	2018	18	11
J	Tsiropoulos, Z; Skoubris, E; Fountas, S; Gravalos, I; Gemtos, T				Tsiropoulos, Zisis; Skoubris, Evangelos; Fountas, Spyros; Gravalos, Ioannis; Gemtos, Theofanis			Development of an Energy Efficient and Fully Autonomous Low-Cost IoT System for Irrigation Scheduling in Water-Scarce Areas Using Different Water Sources	AGRICULTURE-BASEL			English	Article						irrigation scheduling; alternative water sources; low cost; IoT system	SENSOR	Politicians and the general public are concerned about climate change, water scarcity, and the constant reduction in agricultural land. Water reserves are scarce in many regions in the world, negatively affecting agricultural productivity, which makes it a necessity to introduce sustainable water resource management. Nowadays, there is a number of commercial IoT systems for irrigation scheduling,…	[Tsiropoulos, Zisis; Gemtos, Theofanis] Univ Thessaly, Dept Agr Crop Prod & Rural Environm, Volos 38446, Greece; [Tsiropoulos, Zisis; Skoubris, Evangelos] Agr & Environm Solut AGENSO, Markou Mpotsari 47, Athens 11742, Greece; [Skoubris, Evangelos] Univ West Attica, Sch Engn, Dept Surveying & Geoinformat Engn, Egaleo 12243, Greece; [Fountas, Spyros] Agr Univ Athens, Dept Nat Resources Management &…	University of Thessaly; University of West Attica; Agricultural University of Athens; University of Thessaly	Tsiropoulos, Z (corresponding author), Univ Thessaly, Dept Agr Crop Prod & Rural Environm, Volos 38446, Greece.;Tsiropoulos, Z (corresponding author), Agr & Environm Solut AGENSO, Markou Mpotsari 47, Athens 11742, Greece.	tsiropoulos@agenso.gr; eskoubris@uniwa.gr; sfountas@aua.gr; iogravalos@uth.gr; gemtos@uth.gr		Gravalos, Ioannis/0000-0003-0042-2476; Tsiropoulos, Zisis/0000-0002-5077-8270	Horizon 2020 research and innovation program Demonstration of water loops with innovative regenerative business models for the Mediterranean region-HYDROUSA [776643]	Horizon 2020 research and innovation program Demonstration of water loops with innovative regenerative business models for the Mediterranean region-HYDROUSA	This research was supported by the Horizon 2020 research and innovation program Demonstration of water loops with innovative regenerative business models for the Mediterranean region-HYDROUSA (grant agreement No 776643).		41	1	1	4	11	MDPI	BASEL	ST ALBAN-ANLAGE 66, CH-4052 BASEL, SWITZERLAND		2077-0472		AGRICULTURE-BASEL	Agriculture-Basel	JUL	2022	12	7
J	Mendez-Barroso, LA; Rivas-Marquez, JA; Sosa-Tinoco, I; Robles-Morua, A				Mendez-Barroso, L. A.; Rivas-Marquez, J. A.; Sosa-Tinoco, I.; Robles-Morua, A.			Design and implementation of a low-cost multiparameter probe to evaluate the temporal variations of water quality conditions on an estuarine lagoon system	ENVIRONMENTAL MONITORING AND ASSESSMENT			English	Article						Water quality; Estuarine lagoon system; Low-cost probes; Environmental monitoring	RIVER-ESTUARY; INDEX; SENSOR	The measurement of physicochemical variables to infer water quality is important since they help determine the distribution and abundance of aquatic organisms or pollution-related problems. Recently, the development of low-cost probes is a suitable alternative for continuous monitoring of these variables rather than the use of expensive instruments. In this work, a low-cost multiparameter probe (…	[Mendez-Barroso, L. A.; Rivas-Marquez, J. A.; Robles-Morua, A.] Inst Tecnol Sonora, Dept Ciencias Agua & Medio Ambiente, 5 Febrero 818 Sur, Obregon 85000, Sonora, Mexico; [Mendez-Barroso, L. A.; Sosa-Tinoco, I.] Lab Nacl Resiliencia Costera LANRESC, Obregon, Mexico; [Sosa-Tinoco, I.] Inst Tecnol Sonora, Dept Ingn Elect & Elect, Obregon, Mexico		Mendez-Barroso, LA (corresponding author), Inst Tecnol Sonora, Dept Ciencias Agua & Medio Ambiente, 5 Febrero 818 Sur, Obregon 85000, Sonora, Mexico.	luis.mendez@itson.edu.mx	Tinoco, Ian Sosa/I-9037-2019; Robles-Morua, Agustin/A-1755-2015; Mendez-Barroso, Luis Arturo/D-2884-2015	Tinoco, Ian Sosa/0000-0001-7579-5985; Rivas Marquez, Juan Adolfo/0000-0002-4757-1252; Robles-Morua, Agustin/0000-0001-8813-8124; Mendez-Barroso, Luis Arturo/0000-0001-7467-5498	Mexican National Council for Science and Technology (CONACYT) through the funded project National Laboratory of Coastal Resilience [LN-293354, LN-299063]; PROFAPI-ITSON [2019-0118, 2019-186]	Mexican National Council for Science and Technology (CONACYT) through the funded project National Laboratory of Coastal Resilience; PROFAPI-ITSON	We received support from the Mexican National Council for Science and Technology (CONACYT) through the funded project National Laboratory of Coastal Resilience (Grant LN-293354 and LN-299063). Additional funding was provided by PROFAPI-ITSON 2019-0118 and 2019-186.		37	12	12	1	17	SPRINGER	DORDRECHT	VAN GODEWIJCKSTRAAT 30, 3311 GZ DORDRECHT, NETHERLANDS	0167-6369	1573-2959		ENVIRON MONIT ASSESS	Environ. Monit. Assess.	2023-10-17	2020	192	11
J	Kelly, KE; Whitaker, J; Petty, A; Widmer, C; Dybwad, A; Sleeth, D; Martin, R; Butterfield, A				Kelly, K. E.; Whitaker, J.; Petty, A.; Widmer, C.; Dybwad, A.; Sleeth, D.; Martin, R.; Butterfield, A.			Ambient and laboratory evaluation of a low-cost particulate matter sensor	ENVIRONMENTAL POLLUTION			English	Article						Particulate matter; Air quality; Low-cost sensors; Cold-air pool	AEROSOL; PM2.5; UTAH	Low-cost, light-scattering-based particulate matter (PM) sensors are becoming more widely available and are being increasingly deployed in ambient and indoor environments because of their low cost and ability to provide high spatial and temporal resolution PM information. Researchers have begun to evaluate some of these sensors under laboratory and environmental conditions. In this study, a low-c…	[Kelly, K. E.; Petty, A.; Widmer, C.; Butterfield, A.] Univ Utah, Dept Chem Engn, 3290 MEB,50 S Cent Campus Dr, Salt Lake City, UT 84112 USA; [Whitaker, J.] Univ Utah, Dept Elect & Comp Engn, 2110 MEB,50 S Cent Campus Dr, Salt Lake City, UT USA; [Dybwad, A.] PurpleAir, 15183 Moab Way, Draper, UT USA; [Sleeth, D.] Univ Utah, Rocky Mt Ctr Occupat & Environm Hlth, 391 Chipeta Way,Suite C, Salt Lake …	Utah System of Higher Education; University of Utah; Utah System of Higher Education; University of Utah; Utah System of Higher Education; University of Utah; Utah System of Higher Education; Utah State University	Kelly, KE (corresponding author), Univ Utah, Dept Chem Engn, 3290 MEB,50 S Cent Campus Dr, Salt Lake City, UT 84112 USA.	kerry.kelly@utah.edu			National Institute of Biomedical Imaging and Bioengineering of the National Institutes of Health [U54EB021973]; Lawrence T. and Janet T. Dee Foundation; Michael Foundation; University of Utah's Undergraduate Research Experience Program	National Institute of Biomedical Imaging and Bioengineering of the National Institutes of Health(United States Department of Health & Human ServicesNational Institutes of Health (NIH) - USANIH National Institute of Biomedical Imaging & Bioengineering (NIBIB)); Lawrence T. and Janet T. Dee Foundation; Michael Foundation; University of Utah's Undergraduate Research Experience Program	Research reported in this publication was supported by the National Institute of Biomedical Imaging and Bioengineering of the National Institutes of Health under Award Number U54EB021973. The content is solely the responsibility of the authors and does not necessarily represent the official views of the National Institutes of Health. Funding for the AirU sensors was provided by the Lawrence T. an…		19	243	246	5	151	ELSEVIER SCI LTD	OXFORD	THE BOULEVARD, LANGFORD LANE, KIDLINGTON, OXFORD OX5 1GB, OXON, ENGLAND	0269-7491	1873-6424		ENVIRON POLLUT	Environ. Pollut.	FEB	2017	221
J	Win, TTN; Bogaard, T; van de Giesen, N				Win, Thanda Thatoe Nwe; Bogaard, Thom; van de Giesen, Nick			A Low-Cost Water Quality Monitoring System for the Ayeyarwady River in Myanmar Using a Participatory Approach	WATER			English	Article						mobile app; water quality; Ayeyarwady river	CITIZEN SCIENCE; POLLUTION; DELTA	Newly developed mobile phone applications in combination with citizen science are used in different fields of research, such as public health monitoring, environmental monitoring, precipitation monitoring, noise pollution measurement and mapping, earth observation. In this paper, we present a low-cost water quality mobile phone measurement technique combined with sensor and test strips, and repor…	[Win, Thanda Thatoe Nwe; Bogaard, Thom; van de Giesen, Nick] Delft Univ Technol, Fac Civil Engn & Geosci, Dept Water Management, POB 5048, NL-2600 GA Delft, Netherlands	Delft University of Technology	Bogaard, T (corresponding author), Delft Univ Technol, Fac Civil Engn & Geosci, Dept Water Management, POB 5048, NL-2600 GA Delft, Netherlands.	T.T.N.W.ThandaThatoeNweWin@tudelft.nl; t.a.bogaard@tudelft.nl; n.c.vandegiesen@tudelft.nl	van de Giesen, Nick C/B-5010-2008; van de Giesen, Nick/O-8137-2019	van de Giesen, Nick C/0000-0002-7200-3353; van de Giesen, Nick/0000-0002-7200-3353; Bogaard, Thom/0000-0002-1325-024X	Shell International Exploration and Production B.V [UI43981]	Shell International Exploration and Production B.V	This research was funded by Shell International Exploration and Production B.V: Grant number UI43981. Scholarship trust related to integrated water resources management in Myanmar.		42	12	12	4	16	MDPI	BASEL	ST ALBAN-ANLAGE 66, CH-4052 BASEL, SWITZERLAND		2073-4441		WATER-SUI	Water	OCT	2019	11	10
J	Alam, AU; Clyne, D; Jin, H; Hu, NX; Deen, MJ				Alam, Arif U.; Clyne, Dennis; Jin, Hao; Hu, Nan-Xing; Deen, M. Jamal			Fully Integrated, Simple, and Low-Cost Electrochemical Sensor Array for in Situ Water Quality Monitoring	ACS SENSORS			English	Article						water quality monitoring; electrochemical sensing; acetaminophen; estrogen; heavy metal; pH; free chlorine; temperature	PH; DENSITY; SYSTEM	Rapid, accurate and inexpensive monitoring of water quality parameters is indispensable for continued water safety, especially in resource-limited areas. Most conventional sensing systems either can only monitor one parameter at a time or lack user-friendly on-site monitoring capabilities. A fully integrated electrochemical sensor array is an excellent solution to this barrier. Electrochemical se…	[Alam, Arif U.; Clyne, Dennis; Deen, M. Jamal] McMaster Univ, Elect & Comp Engn, Hamilton, ON L8S 4K1, Canada; [Jin, Hao] Zhejiang Univ, Informat Sci & Elect Engn, Hangzhou 310027, Peoples R China; [Hu, Nan-Xing] Xerox Res Ctr Canada Ltd, Adv Mat Lab, Mississauga, ON L5K 2L1, Canada	McMaster University; Zhejiang University; Xerox	Deen, MJ (corresponding author), McMaster Univ, Elect & Comp Engn, Hamilton, ON L8S 4K1, Canada.	jamal@mcmaster.ca	Deen, M. Jamal/A-7567-2008; Alam, Arif Ul/H-7508-2019; Alam, Arif Ul/P-1861-2014	Deen, M. Jamal/0000-0002-6390-0933; Alam, Arif Ul/0000-0002-5679-0959	Natural Science and Engineering Research Council of Canada; Canada Foundation for Innovation; Ontario Research Fund for Research Excellence Funding Grant; FedDev of Southern Ontario grant; Canada Research Chair program; NSERC RES'EAU strategic network; NCE IC -IMPACTS [508526-7]; NSERC Green Electronics Network (GreEN) [508526-7]	Natural Science and Engineering Research Council of Canada(Natural Sciences and Engineering Research Council of Canada (NSERC)); Canada Foundation for Innovation(Canada Foundation for InnovationCGIARSpanish Government); Ontario Research Fund for Research Excellence Funding Grant; FedDev of Southern Ontario grant; Canada Research Chair program(Canada Research Chairs); NSERC RES'EAU strategic netwo…	This research was supported by Discovery Grants from the Natural Science and Engineering Research Council of Canada, an infrastructure grant from the Canada Foundation for Innovation, an Ontario Research Fund for Research Excellence Funding Grant, a FedDev of Southern Ontario grant, the Canada Research Chair program, NSERC RES'EAU strategic network, and the NCE IC -IMPACTS and NSERC Green Electro…		32	42	42	7	55	AMER CHEMICAL SOC	WASHINGTON	1155 16TH ST, NW, WASHINGTON, DC 20036 USA	2379-3694			ACS SENSORS	ACS Sens.	FEB	2020	5	2
J	Waseem, MH; Alamzeb, M; Mustafa, B; Malik, F; Shakir, M; Khan, MA				Waseem, Mohammad Haroon; Alamzeb, Muhammad; Mustafa, Basir; Malik, Fahad; Shakir, Mustafa; Khan, Mahmood Ashraf			Design of a Low-cost Underwater Wireless Sensor Network for Water Quality Monitoring	IETE JOURNAL OF RESEARCH			English	Article						Sensor networks; Underwater wireless sensor networks; Water quality monitoring; ZigBee technology		With the ongoing advancements in the field of wireless technologies and sensor networking, a lot of research is taking place in using such sensor networks for multitude monitoring situations, e. g. home, office monitoring systems, body area sensor networks, and environmental monitoring systems. These systems cost a lot and are complicated as in operating. Thus, our main goal is the development of…	[Waseem, Mohammad Haroon; Alamzeb, Muhammad; Mustafa, Basir; Malik, Fahad; Shakir, Mustafa; Khan, Mahmood Ashraf] COMSATS Inst Informat & Technol, Dept Elect Engn, Islamabad, Pakistan	COMSATS University Islamabad (CUI)	Waseem, MH (corresponding author), COMSATS Inst Informat & Technol, Dept Elect Engn, Pk Rd, Islamabad, Pakistan.	mharoonwaseem@gmail.com; m.alamzeb@hotmail.com; basir.mustafa.eng@gmail.com; fahadmalik_09@hotmail.com; mustafa.shakir@comsats.edu.pk; mahmoodashraf@comsats.edu.pk	Shakir, Mustafa/AAZ-1597-2021; Alamzeb, Muhammad/AAC-3202-2021; Khan, Mahmood A/B-9191-2014	Shakir, Mustafa/0000-0002-7561-1151					6	6	6	1	31	TAYLOR & FRANCIS LTD	ABINGDON	2-4 PARK SQUARE, MILTON PARK, ABINGDON OR14 4RN, OXON, ENGLAND	0377-2063	0974-780X		IETE J RES	IETE J. Res.	SEP-OCT	2013	59	5
J	Chan, KS; Schillereff, DN; Baas, ACW; Chadwick, MA; Main, B; Mulligan, M; O'Shea, FT; Pearce, R; Smith, TEL; van Soesbergen, A; Tebbs, E; Thompson, J				Chan, Kristofer; Schillereff, Daniel N.; Baas, Andreas C. W.; Chadwick, Michael A.; Main, Bruce; Mulligan, Mark; O'Shea, Francis T.; Pearce, Reagan; Smith, Thomas E. L.; van Soesbergen, Arnout; Tebbs, Emma; Thompson, Joseph			Low-cost electronic sensors for environmental research: Pitfalls and opportunities	PROGRESS IN PHYSICAL GEOGRAPHY-EARTH AND ENVIRONMENT			English	Article						Arduino; build-it-yourself; data-logging; environmental monitoring; FreeStation; low-cost electronic sensors; microcontrollers; open-source; open-source hardware	AIR-QUALITY SENSORS; MONITORING STRATEGIES; WATER; POLLUTION; PERFORMANCE; EXPOSURE; RIVER; SEDIMENT; CLIMATE; ARDUINO	Repeat observations underpin our understanding of environmental processes, but financial constraints often limit scientists' ability to deploy dense networks of conventional commercial instrumentation. Rapid growth in the Internet-Of-Things (IoT) and the maker movement is paving the way for low-cost electronic sensors to transform global environmental monitoring. Accessible and inexpensive sensor…	[Chan, Kristofer; Schillereff, Daniel N.; Baas, Andreas C. W.; Chadwick, Michael A.; Main, Bruce; Mulligan, Mark; O'Shea, Francis T.; Pearce, Reagan; van Soesbergen, Arnout; Tebbs, Emma; Thompson, Joseph] Kings Coll London, London, England; [Smith, Thomas E. L.] London Sch Econ & Polit Sci, London, England; [Thompson, Joseph] Lichfields, London, England	University of London; King's College London; University of London; London School Economics & Political Science	Schillereff, DN (corresponding author), Kings Coll London, Dept Geog, Bush House North East Wing,30 Aldwych, London WC2B 4BG, England.	daniel.schillereff@kcl.ac.uk	Schillereff, Daniel/K-2489-2019; Chadwick, Michael/ABF-6431-2020	Schillereff, Daniel/0000-0002-4928-6068; Chadwick, Michael/0000-0003-4891-4357; Tebbs, Emma/0000-0003-0575-1236; Pearce, Reagan/0000-0003-2610-0643; Mulligan, Mark/0000-0002-0132-0888	Natural Environmental Research Council; Arts & Humanities Research Council [NE/R017999/1]; Economic and Social Research Council [ES/R002126/1]; King's College London (KCL) Undergraduate Research Fellow programme; KCL Faculty of Social Science and Public Policy for a Research Grant; KCL Education Grant; KCL Widening Participation Grant; London School of Economics for a Learning Technology and Inno…	Natural Environmental Research Council(UK Research & Innovation (UKRI)Natural Environment Research Council (NERC)); Arts & Humanities Research Council(UK Research & Innovation (UKRI)Arts & Humanities Research Council (AHRC)); Economic and Social Research Council(UK Research & Innovation (UKRI)Economic & Social Research Council (ESRC)); King's College London (KCL) Undergraduate Research Fellow pro…	The author(s) disclosed receipt of the following financial support for the research, authorship, and/or publication of this article: the Natural Environmental Research Council and the Arts & Humanities Research Council (grant number NE/R017999/1), the Economic and Social Research Council (grant number ES/R002126/1), the King's College London (KCL) Undergraduate Research Fellow programme, the KCL …		110	22	22	4	30	SAGE PUBLICATIONS LTD	LONDON	1 OLIVERS YARD, 55 CITY ROAD, LONDON EC1Y 1SP, ENGLAND	0309-1333	1477-0296		PROG PHYS GEOG	Prog. Phys. Geogr.	JUN	2021	45	3
J	Jo, W; Hoashi, Y; Aguilar, LLP; Postigo-Malaga, M; Garcia-Bravo, JM; Min, BC				Jo, Wonse; Hoashi, Yuta; Paredes Aguilar, Lizbeth Leonor; Postigo-Malaga, Mauricio; Garcia-Bravo, Jose M.; Min, Byung-Cheol			A low-cost and small USV platform for water quality monitoring	HARDWAREX			English	Article						Unmanned Surface Vehicles (USVs); Water Monitoring System; Underwater Thruster Control; Arduino		We propose a new, fully open-source, low-cost, and small-sized Unmanned Surface Vehicle (USV) for measuring near-surface water quality in real time in various environments. Existing commercial USVs are expensive and not fully based on open-source hardware, making it difficult to purchase them and to modify their designs and programming to suit various environments. In contrast, the USV platform p…	[Jo, Wonse; Hoashi, Yuta; Min, Byung-Cheol] Purdue Univ, Dept Comp & Informat Technol, Smart Lab, W Lafayette, IN 47907 USA; [Hoashi, Yuta] Purdue Univ, Sch Mech Engn, W Lafayette, IN 47907 USA; [Paredes Aguilar, Lizbeth Leonor; Postigo-Malaga, Mauricio] Univ Nacl San Agustin, Sch Elect Engn, Arequipa, Peru; [Garcia-Bravo, Jose M.] Purdue Univ, Sch Engn Technol, W Lafayette, IN 47907 USA	Purdue University System; Purdue University; Purdue University West Lafayette Campus; Purdue University System; Purdue University; Purdue University West Lafayette Campus; Universidad Nacional de San Agustin de Arequipa; Purdue University System; Purdue University; Purdue University West Lafayette Campus	Min, BC (corresponding author), Purdue Univ, Dept Comp & Informat Technol, Smart Lab, W Lafayette, IN 47907 USA.	jow@purdue.edu; yhoashi@purdue.edu; lparedesa@unsa.edu.pe; mpostigom@unsa.edu.pe; jmgarcia@purdue.edu; minb@purdue.edu	POSTIGO-MALAGA, MAURICIO/AAT-9325-2020; Garcia Bravo, Jose/M-2044-2018	Garcia Bravo, Jose/0000-0002-3017-3354; Min, Byung-Cheol/0000-0001-6458-4365; POSTIGO-MALAGA, Mauricio/0000-0002-5878-1765; Jo, Wonse/0000-0002-6904-5878	Purdue Research Foundation Graduate Fellowship; Arequipa Nexus Institute	Purdue Research Foundation Graduate Fellowship; Arequipa Nexus Institute	This work was supported in part by the Purdue Research Foundation Graduate Fellowship and by the Arequipa Nexus Institute. The authors also thank the many members of the research team who assisted with different aspects of this work; notably Shyam Sundar Kannan, Jee Hwan Park, and Tamzidul Mina.		17	22	22	0	4	ELSEVIER	AMSTERDAM	RADARWEG 29, 1043 NX AMSTERDAM, NETHERLANDS		2468-0672		HARDWAREX	HardwareX	OCT	2019	6
J	Rivera-Munoz, LM; Gallego-Villada, JD; Giraldo-Forero, AF; Martinez-Vargas, JD				Rivera-Munoz, Leon M.; Gallego-Villada, Juan D.; Giraldo-Forero, Andres F.; Martinez-Vargas, Juan D.			Missing Data Estimation in a Low-Cost Sensor Network for Measuring Air Quality: a Case Study in Aburra Valley	WATER AIR AND SOIL POLLUTION			English	Article						Matrix factorization; Machine learning; Low-cost sensors network; Missing data estimation	CALIBRATION; EXPOSURE	According to the World Health Organization (WHO), air pollution is currently one leading cause of death around the world. As a result, some projects have emerged to monitor air quality through the implementation of low-cost Wireless Sensor Networks (WSNs). However, the type of technology and the sensors' location have an impact on data quality, resulting in a considerable amount of missing data. …	[Rivera-Munoz, Leon M.; Gallego-Villada, Juan D.; Giraldo-Forero, Andres F.; Martinez-Vargas, Juan D.] Inst Tecnol Metropolitano ITM, Medellin, Colombia		Rivera-Munoz, LM (corresponding author), Inst Tecnol Metropolitano ITM, Medellin, Colombia.	leonrivera281329@correo.itm.edu.co	Forero, Andrés Felipe F Giraldo/P-7544-2018	Forero, Andrés Felipe F Giraldo/0000-0003-3524-5502; Rivera Munoz, Leon Mauricio/0000-0002-2559-236X; Gallego Villada, Juan Diego/0000-0003-3212-7287	MIRP Instituto Tecnologico Metropolitano (ITM) [PCI21108]	MIRP Instituto Tecnologico Metropolitano (ITM)	The authors would like to acknowledge the cooperation of Sistema de Alerta Temprana del Valle de Aburra (SIATA) in providing the data and to the installed capacity project PCI21108 belonging to the research group MIRP Instituto Tecnologico Metropolitano (ITM).		40	4	4	2	7	SPRINGER INT PUBL AG	CHAM	GEWERBESTRASSE 11, CHAM, CH-6330, SWITZERLAND	0049-6979	1573-2932		WATER AIR SOIL POLL	Water Air Soil Pollut.	OCT	2021	232	10
J	Madeo, D; Pozzebon, A; Mocenni, C; Bertoni, D				Madeo, Dario; Pozzebon, Alessandro; Mocenni, Chiara; Bertoni, Duccio			A Low-Cost Unmanned Surface Vehicle for Pervasive Water Quality Monitoring	IEEE TRANSACTIONS ON INSTRUMENTATION AND MEASUREMENT			English	Article						Bathymetry; biochemical parameters; long range (LoRa); unmanned surface vehicle (USV); water monitoring	PARAMETER-ESTIMATION; IDENTIFICATION; MODELS	This article discusses the architecture of a low-cost unmanned surface vehicle (USV) to be employed for the collection of crucial parameters about water quality in rivers, lakes, or sea. The vehicle, called water environmental mobile observer (WeMo), has been realized exploiting off-the-shelf components and is provided with a modular array of sensors to measure chemical and physical parameters as…	[Madeo, Dario; Pozzebon, Alessandro; Mocenni, Chiara] Univ Siena, Dept Informat Engn & Math, I-53100 Siena, Italy; [Bertoni, Duccio] Univ Pisa, Dept Earth Sci, I-56126 Pisa, Italy	University of Siena; University of Pisa	Pozzebon, A (corresponding author), Univ Siena, Dept Informat Engn & Math, I-53100 Siena, Italy.	madeo@dii.unisi.it; alessandro.pozzebon@unisi.it; mocenni@dii.unisi.it; duccio.bertoni@unipi.it	Mocenni, Chiara/AAU-5018-2021; Bertoni, Duccio/ABC-6062-2020; Mocenni, Chiara/X-4424-2019	Bertoni, Duccio/0000-0003-4323-2437; Madeo, Dario/0000-0001-7045-3054; Mocenni, Chiara/0000-0002-1259-6003; Pozzebon, Alessandro/0000-0003-3991-8858					42	31	31	5	42	IEEE-INST ELECTRICAL ELECTRONICS ENGINEERS INC	PISCATAWAY	445 HOES LANE, PISCATAWAY, NJ 08855-4141 USA	0018-9456	1557-9662		IEEE T INSTRUM MEAS	IEEE Trans. Instrum. Meas.	APR	2020	69	4	2
J	Campagnaro, F; Steinmetz, F; Renner, BC				Campagnaro, Filippo; Steinmetz, Fabian; Renner, Bernd-Christian			Survey on Low-Cost Underwater Sensor Networks: From Niche Applications to Everyday Use	JOURNAL OF MARINE SCIENCE AND ENGINEERING			English	Article						underwater acoustic networks; underwater acoustic positioning system; underwater low-cost assets; underwater monitoring; review	NAVIGATION SYSTEM; LOCALIZATION; ALGORITHMS; VEHICLES; DESIGN; MODEM	Traditionally, underwater acoustic modems and positioning systems were developed for military and Oil & Gas industries, that require deep water deployments and extremely reliable systems, focusing on high power expensive systems and leaving the use of low-cost devices only attractive for academic studies. Conversely, recent developments of low-cost unmanned vehicles, such as remotely operated veh…	[Campagnaro, Filippo] Univ Padua, Dept Informat Engn, Via Gradenigo 6b, I-35131 Padua, Italy; [Steinmetz, Fabian; Renner, Bernd-Christian] Hamburg Univ Technol, Inst Autonomous Cyber Phys Syst, Harburger Schlossstr 28, D-21079 Hamburg, Germany	University of Padua; Hamburg University of Technology	Campagnaro, F (corresponding author), Univ Padua, Dept Informat Engn, Via Gradenigo 6b, I-35131 Padua, Italy.	campagn1@dei.unipd.it		Renner, Bernd-Christian/0000-0002-6936-6444; Steinmetz, Fabian/0000-0002-9050-7504; Campagnaro, Filippo/0000-0003-0432-7310					94	1	1	10	10	MDPI	BASEL	ST ALBAN-ANLAGE 66, CH-4052 BASEL, SWITZERLAND		2077-1312		J MAR SCI ENG	J. Mar. Sci. Eng.	JAN	2023	11	1
J	Tuna, G; Arkoc, O; Gulez, K				Tuna, Gurkan; Arkoc, Orhan; Gulez, Kayhan			Continuous Monitoring of Water Quality Using Portable and Low-Cost Approaches	INTERNATIONAL JOURNAL OF DISTRIBUTED SENSOR NETWORKS			English	Article							MULTIVARIATE STATISTICAL TECHNIQUES; WIRELESS SENSOR NETWORK; AIRBOAT; DESIGN; LAKE	Water quality refers to the physical, chemical, and biological characteristics of water, and it is a measure of the condition of water relative to any human need or purpose. A particular problem with measuring the condition of water quality at drinking water reservoirs is the requirement of collecting a large number of samples. To handle this problem, we focus on the practical use of two differen…	[Tuna, Gurkan] Trakya Univ, Edirne Tech Sci Vocat Sch, Comp Programming Dept, TR-22020 Edirne, Turkey; [Arkoc, Orhan] Kirklareli Univ, Sch Tech Sci, TR-39100 Kirklareli, Turkey; [Gulez, Kayhan] Yildiz Tech Univ, Elect Elect Fac, Control & Automat Engn Dept, TR-34220 Istanbul, Turkey	Trakya University; Kirklareli University; Yildiz Technical University	Tuna, G (corresponding author), Trakya Univ, Edirne Tech Sci Vocat Sch, Comp Programming Dept, TR-22020 Edirne, Turkey.	gurkantuna@trakya.edu.tr	bilge, derya/O-7696-2014; Tuna, Gurkan/AAG-4412-2019; Arkoc, Orhan/P-4174-2019; Arkoc, Orhan/F-9948-2017	Tuna, Gurkan/0000-0002-6466-4696; Arkoc, Orhan/0000-0002-5610-8251; Arkoc, Orhan/0000-0002-5610-8251					34	68	68	2	2	SAGE PUBLICATIONS INC	THOUSAND OAKS	2455 TELLER RD, THOUSAND OAKS, CA 91320 USA	1550-1477			INT J DISTRIB SENS N	Int. J. Distrib. Sens. Netw.		2013
J	Horsburgh, JS; Caraballo, J; Ramirez, M; Aufdenkampe, AK; Arscott, DB; Damiano, SG				Horsburgh, Jeffery S.; Caraballo, Juan; Ramirez, Maurier; Aufdenkampe, Anthony K.; Arscott, David B.; Damiano, Sara Geleskie			Low-Cost, Open-Source, and Low-Power: But What to Do With the Data?	FRONTIERS IN EARTH SCIENCE			English	Article						low-cost; open-source; environmental sensors; data management; Arduino; Mayfly datalogger; EnviroDIY; Monitor My Watershed	ENVIRONMENTAL SENSOR NETWORKS; WATER-QUALITY; ARDUINO	There are now many ongoing efforts to develop low-cost, open-source, low-power sensors and datalogging solutions for environmental monitoring applications. Many of these have advanced to the point that high quality scientific measurements can be made using relatively inexpensive and increasingly off-the-shelf components. With the development of these innovative systems, however, comes the ability…	[Horsburgh, Jeffery S.] Utah State Univ, Dept Civil & Environm Engn, Logan, UT 84322 USA; [Horsburgh, Jeffery S.; Caraballo, Juan; Ramirez, Maurier] Utah State Univ, Utah Water Res Lab, Logan, UT 84322 USA; [Aufdenkampe, Anthony K.] LimnoTech, Oakdale, MN USA; [Arscott, David B.; Damiano, Sara Geleskie] Stroud Water Res Ctr, Avondale, PA USA	Utah System of Higher Education; Utah State University; Utah System of Higher Education; Utah State University	Horsburgh, JS (corresponding author), Utah State Univ, Dept Civil & Environm Engn, Logan, UT 84322 USA.;Horsburgh, JS (corresponding author), Utah State Univ, Utah Water Res Lab, Logan, UT 84322 USA.	jeff.horsburgh@usu.edu	Horsburgh, Jeffery S/E-8975-2010	Horsburgh, Jeffery S/0000-0002-0768-3196	William Penn Foundation [158-15]	William Penn Foundation	Funding for this work was provided by the William Penn Foundation under grant 158-15. The opinions expressed herein are those of the authors and do not necessarily reflect the views of theWilliam Penn Foundation.		32	22	22	0	13	FRONTIERS MEDIA SA	LAUSANNE	AVENUE DU TRIBUNAL FEDERAL 34, LAUSANNE, CH-1015, SWITZERLAND		2296-6463		FRONT EARTH SC-SWITZ	Front. Earth Sci.	2023-04-03	2019	7
J	Wei, JX; Qin, F; Li, G; Li, XJ; Liu, XB; Dai, XW				Wei, Junxuan; Qin, Fei; Li, Gang; Li, Xujie; Liu, Xiaobo; Dai, Xuewu			Chirp modulation enabled turbidity measurement for large scale monitoring of fresh water	MEASUREMENT			English	Article						Optical turbidity measurement; Chirp modulation; Large scale monitoring; Wide range; Low-cost	DESIGN	Monitoring water turbidity accurately at a large scale provides vital information to alert abnormal water pollution event. However, scientists and engineers have to make the tradeoff among accuracy, range, and cost of turbidity measurement solutions. Consequently, the state of the art solutions utilize high-end hardware configurations to maintain high accuracy at wide dynamic range, which are eit…	[Wei, Junxuan; Qin, Fei] Univ Chinese Acad Sci, Sch Elect Elect & Commun Engn, Beijing, Peoples R China; [Li, Gang] Minist Water Resources Peoples Republ China, Informat Ctr, Beijing, Peoples R China; [Li, Xujie] Hohai Univ, Coll Comp & Informat, Nanjing, Peoples R China; [Liu, Xiaobo] China Inst Water Resources & Hydropower Res, Dept Water Ecol & Environm, Beijing, Peoples R China; [Dai, Xuewu] …	Chinese Academy of Sciences; University of Chinese Academy of Sciences, CAS; Hohai University; China Institute of Water Resources & Hydropower Research; Northumbria University	Qin, F (corresponding author), Univ Chinese Acad Sci, Sch Elect Elect & Commun Engn, Beijing, Peoples R China.;Dai, XW (corresponding author), Northumbria Univ, Dept Phys & Elect Engn, Northumbria, England.	fqin1982@ucas.ac.cn; xuewu.dai@northumbria.ac.uk	qin, fei/L-5557-2015	qin, fei/0000-0003-1671-8968	Fundamental Research Funds for the Central Universities, China; Open Research Fund Key Laboratory of Wireless Sensor Network and Communication, Chinese Academy of Sciences [20190914]; Provincial Key Research and Development Program of Jiangsu, China [BE2019017]; Provincial Water Science and Technology Program of Jiangsu, China [2020028]	Fundamental Research Funds for the Central Universities, China(Fundamental Research Funds for the Central Universities); Open Research Fund Key Laboratory of Wireless Sensor Network and Communication, Chinese Academy of Sciences; Provincial Key Research and Development Program of Jiangsu, China; Provincial Water Science and Technology Program of Jiangsu, China	This work is supported by the Fundamental Research Funds for the Central Universities, China, in part by Open Research Fund Key Laboratory of Wireless Sensor Network and Communication, Chinese Academy of Sciences under Grant 20190914, in part by the Provincial Key Research and Development Program of Jiangsu, China under Grant BE2019017, and in part by the Provincial Water Science and Technology P…		33	4	4	2	6	ELSEVIER SCI LTD	OXFORD	THE BOULEVARD, LANGFORD LANE, KIDLINGTON, OXFORD OX5 1GB, OXON, ENGLAND	0263-2241	1873-412X		MEASUREMENT	Measurement	NOV	2021	184
J	Khamis, K; Ouellet, V; Croghan, D; Gonzalez, LMH; Packman, AI; Hannah, DM; Krause, S				Khamis, Kieran; Ouellet, Valerie; Croghan, Danny; Gonzalez, Liliana M. Hernandez M.; Packman, Aaron I.; Hannah, David M.; Krause, Stefan			The Autobot-WQ: A portable, low-cost autosampler to provide new insight into urban spatio-temporal water quality dynamics	FRONTIERS IN BUILT ENVIRONMENT			English	Article						environmental monitoring; water quality; hydrology; urban rivers; open source	DISSOLVED ORGANIC-MATTER; STREAM; TIME; URBANIZATION; LANDSCAPE; GREEN; RIVER; HEADWATERS; POLLUTION; RESPONSES	Urbanization and the increase in urban land cover are growing concerns associated with numerous negative impacts on surface water quality. Currently, many emerging contaminants are difficult to measure with no field deployable sensors currently available. Hence, discrete grab samples are required for subsequent laboratory analysis. To capture the spatiotemporal variability in pollution pulses, au…	[Khamis, Kieran; Ouellet, Valerie; Croghan, Danny; Hannah, David M.; Krause, Stefan] Univ Birmingham, Sch Geog Earth & Environm Sci, Birmingham, England; [Khamis, Kieran; Ouellet, Valerie; Croghan, Danny; Hannah, David M.; Krause, Stefan] Inst Global Innovat, Birmingham, England; [Gonzalez, Liliana M. Hernandez M.; Packman, Aaron I.] Northwestern Univ, McCormick Sch Engn, Evanston, IL USA; [Kraus…	University of Birmingham; Northwestern University; UDICE-French Research Universities; Universite Claude Bernard Lyon 1; Centre National de la Recherche Scientifique (CNRS)	Khamis, K (corresponding author), Univ Birmingham, Sch Geog Earth & Environm Sci, Birmingham, England.;Khamis, K (corresponding author), Inst Global Innovat, Birmingham, England.	k.khamis@bham.ac.uk	Ouellet, Valerie/I-3914-2018; Hannah, David/B-9221-2015	Ouellet, Valerie/0000-0001-7410-1857; Hannah, David/0000-0003-1714-1240; Krause, Stefan/0000-0003-2521-2248	European Union [34317]; US National Science Foundation [CBET-1848683]	European Union(European CommissionSpanish Government); US National Science Foundation(National Science Foundation (NSF))	The main funding for this project came from European Union's Horizon 2020 Research and Innovation Programme under the Marie Sklodowska-Curie Grant Agreement number 34317 (HiFreq). This work was also supported by US National Science Foundation award number CBET-1848683.		53	0	0	3	3	FRONTIERS MEDIA SA	LAUSANNE	AVENUE DU TRIBUNAL FEDERAL 34, LAUSANNE, CH-1015, SWITZERLAND		2297-3362		FRONT BUILT ENVIRON	Front. Built Environ.	2023-04-13	2023	9
J	Eidam, EF; Langhorst, T; Goldstein, EB; McLean, M				Eidam, Emily F.; Langhorst, Theodore; Goldstein, Evan B.; McLean, McKenzie			OpenOBS: Open-source, low-cost optical backscatter sensors for water quality and sediment-transport research	LIMNOLOGY AND OCEANOGRAPHY-METHODS			English	Article							SUSPENDED-SEDIMENT; IMPACTS; FLUXES; RIVER; SAND; WAVE; SUSPENSION; CALIFORNIA; TURBIDITY; DELTA	Optical backscatter sensors (OBSs) are commonly used to measure the turbidity, or light obscuration, of water in fresh and marine environments and various industrial applications. These turbidity data are commonly calibrated to yield total suspended solids (TSS) or suspended sediment concentration (SSC) measurements for water quality, sediment transport, and diverse other research and environment…	[Eidam, Emily F.; McLean, McKenzie] Univ N Carolina, Dept Marine Sci, Chapel Hill, NC 27515 USA; [Langhorst, Theodore] Univ N Carolina, Dept Geol Sci, Chapel Hill, NC 27515 USA; [Goldstein, Evan B.] Univ N Carolina, Dept Geog Environm & Sustainabil, Greensboro, NC USA	University of North Carolina; University of North Carolina Chapel Hill; University of North Carolina; University of North Carolina Chapel Hill; University of North Carolina; University of North Carolina Greensboro	Eidam, EF (corresponding author), Univ N Carolina, Dept Marine Sci, Chapel Hill, NC 27515 USA.	efe@unc.edu		Eidam, Emily/0000-0002-1906-8692	Reynolds Foundation through a UNC grant	Reynolds Foundation through a UNC grant	The authors thank Carly Richardson for assistance writing the early Arduino code, Tom Eidam for advising the early circuit design, and Nick Cohn and the field support staff at USACE-FRF for assistance conducting surf zone validation tests. They would also like to thank the Reynolds Foundation for funding this work through a UNC grant to PI Emily F. Eidam, and associate editor Scott Ensign as well…		57	3	3	2	11	WILEY	HOBOKEN	111 RIVER ST, HOBOKEN 07030-5774, NJ USA	1541-5856			LIMNOL OCEANOGR-METH	Limnol. Oceanogr. Meth.	JAN	2022	20	1
J	Hunt, CW; Snyder, L; Salisbury, JE; Vandemark, D; McDowell, WH				Hunt, Christopher W.; Snyder, Lisle; Salisbury, Joseph E.; Vandemark, Douglas; McDowell, William H.			SIPCO2: A simple, inexpensive surface water pCO(2) sensor	LIMNOLOGY AND OCEANOGRAPHY-METHODS			English	Article							IN-SITU MEASUREMENTS; CARBON-DIOXIDE; CO2 EXCHANGE; WIDE-RANGE; SEA; OVERESTIMATION; ALKALINITY; EMISSIONS; FLUXES	Efforts to estimate air-water carbon dioxide (CO2) exchange on regional or global scales are constrained by a lack of direct, continuous surface water CO2 observations. Sensor technology for the in situ measurement of the partial pressure of carbon dioxide (pCO(2)) has progressed, but still poses limitations including expense and bio-fouling concerns. We describe a simple, inexpensive, in situ pC…	[Hunt, Christopher W.; Salisbury, Joseph E.; Vandemark, Douglas] Univ New Hampshire, Ocean Proc Anal Lab, Durham, NH USA; [Snyder, Lisle; McDowell, William H.] Univ New Hampshire, Dept Nat Resources & Environm, Durham, NH USA	University System Of New Hampshire; University of New Hampshire; University System Of New Hampshire; University of New Hampshire	Hunt, CW (corresponding author), Univ New Hampshire, Ocean Proc Anal Lab, Durham, NH USA.	chunt@unh.edu	McDowell, William H/E-9767-2010	McDowell, William H/0000-0002-8739-9047; Vandemark, Douglas/0000-0003-4367-5457	NOAA Award [NA15NOS0120155]; NOAA/NERACOOS Award [A002004]; EPSCoR Ecosystems and Society Award [EPS-1101245]; New Hampshire Agricultural Experiment Station; USDA National Institute of Food and Agriculture McIntire-Stennis Project [1006760]; Division Of Environmental Biology; Direct For Biological Sciences [1442444] Funding Source: National Science Foundation; EPSCoR; Office Of The Director [1101…	NOAA Award; NOAA/NERACOOS Award; EPSCoR Ecosystems and Society Award; New Hampshire Agricultural Experiment Station; USDA National Institute of Food and Agriculture McIntire-Stennis Project; Division Of Environmental Biology; Direct For Biological Sciences(National Science Foundation (NSF)NSF - Directorate for Biological Sciences (BIO)); EPSCoR; Office Of The Director(National Science Foundation …	Associate Editor Michael Degrandpre, reviewer Wiley Evans, and one anonymous reviewer provided essential criticism and feedback which greatly helped shape this work. Lauren Koenig provided a thoughtful review of an early version of this paper. Funding for this work was provided by NOAA Award NA15NOS0120155, NOAA/NERACOOS Award A002004, and EPSCoR Ecosystems and Society Award EPS-1101245. Partial …		39	12	13	0	27	WILEY	HOBOKEN	111 RIVER ST, HOBOKEN 07030-5774, NJ USA	1541-5856			LIMNOL OCEANOGR-METH	Limnol. Oceanogr. Meth.	MAR	2017	15	3
J	Rodero, C; Bardaji, R; Olmedo, E; Piera, J				Rodero, Carlos; Bardaji, Raul; Olmedo, Estrella; Piera, Jaume			Operational monitoring of water quality with a Do-It-Yourself modular instrument	FRONTIERS IN MARINE SCIENCE			English	Article						water quality; diffuse attenuation coefficient; do-it-yourself; low-cost operational oceanography; KduPRO; KdUINO; marine citizen science; coastal management	SCIENCE; OPTICS	We analyze the efficacy of using a Do-It-Yourself (DIY) modular instrument to estimate the diffuse attenuation coefficient (K-d) of photosynthetically active radiation (PAR), which can be used for operational oceanography in turbid shallow waters. This parameter evaluates the water transparency, as it summarizes several water components providing an indicator for water quality. Historically, wate…	[Rodero, Carlos; Piera, Jaume] CSIC, Inst Marine Sci, Dept Phys & Technol Oceanog, Environm & Sustainabil Participatory Informat Syst, Barcelona, Spain; [Bardaji, Raul] CSIC, Marine Technol Unit, Barcelona, Spain; [Olmedo, Estrella] CSIC, Inst Marine Sci, Barcelona Expert Ctr, Dept Phys & Technol Oceanog, Barcelona, Spain	Consejo Superior de Investigaciones Cientificas (CSIC); CSIC - Centro Mediterraneo de Investigaciones Marinas y Ambientales (CMIMA); CSIC - Instituto de Ciencias del Mar (ICM); Consejo Superior de Investigaciones Cientificas (CSIC); CSIC - Centro Mediterraneo de Investigaciones Marinas y Ambientales (CMIMA); CSIC - Unidad de Tecnologia Marina (UTM); Consejo Superior de Investigaciones Cientificas…	Rodero, C (corresponding author), CSIC, Inst Marine Sci, Dept Phys & Technol Oceanog, Environm & Sustainabil Participatory Informat Syst, Barcelona, Spain.	rodero@icm.csic.es							38	0	0	5	5	FRONTIERS MEDIA SA	LAUSANNE	AVENUE DU TRIBUNAL FEDERAL 34, LAUSANNE, CH-1015, SWITZERLAND		2296-7745		FRONT MAR SCI	Front. Mar. Sci.	2023-12-16	2022	9
J	Campos, HD; de Oliveira, HFE; Mesquita, M; de Castro, LEV; Ferrarezi, RS				Campos, Hugo de Moura; de Oliveira, Henrique Fonseca E.; Mesquita, Marcio; Vieira de Castro, Lucas Eduardo; Ferrarezi, Rhuanito Soranz			Low-cost open-source platform for irrigation automation	COMPUTERS AND ELECTRONICS IN AGRICULTURE			English	Article						Volumetric water content; Sensors; Cherry tomato; Water use efficiency	SOIL-MOISTURE SENSOR; WATER-USE EFFICIENCY; DEFICIT IRRIGATION; CAPACITANCE SENSORS; FLOW SUBIRRIGATION; FRUIT-QUALITY; SYSTEM; YIELD; GREENHOUSE; MANAGEMENT	Sensor-based irrigation can be used to optimize crop production and deliver water precisely on demand. However, commercially available control systems can be expensive. To reduce the cost of automated irrigation systems, researchers have used alternative low-cost open-source platforms coupled to capacitive sensors that can monitor volumetric soil water content (VWC) in real-time, allowing on-dema…	[Campos, Hugo de Moura; de Oliveira, Henrique Fonseca E.; Mesquita, Marcio] Goiano Fed Inst, Cerrado Irrigat Grad Program, Ceres, Go, Brazil; [Mesquita, Marcio] Univ Fed Goias, Fac Agron, Goiania, Go, Brazil; [Vieira de Castro, Lucas Eduardo] Goiano Fed Inst, Fac Agron, Ceres, Go, Brazil; [Ferrarezi, Rhuanito Soranz] Univ Florida, Indian River Res & Educ Ctr, Hort Sci Dept, Ft Pierce, FL USA; [Fe…	Instituto Federal de Goias (IFG); Universidade Federal de Goias; Instituto Federal de Goias (IFG); State University System of Florida; University of Florida; University System of Georgia; University of Georgia	Ferrarezi, RS (corresponding author), Univ Georgia, Dept Hort, Athens, GA 30602 USA.	ferrarezi@uga.edu	Ferrarezi, Rhuanito Soranz/AAI-2598-2019; Mesquita, Marcio/C-8358-2019; Oliveira, Henrique/M-7142-2018	Ferrarezi, Rhuanito Soranz/0000-0002-6873-7995; Mesquita, Marcio/0000-0001-9399-4478; Oliveira, Henrique/0000-0001-8698-292X					42	1	1	10	23	ELSEVIER SCI LTD	OXFORD	THE BOULEVARD, LANGFORD LANE, KIDLINGTON, OXFORD OX5 1GB, OXON, ENGLAND	0168-1699	1872-7107		COMPUT ELECTRON AGR	Comput. Electron. Agric.	NOV	2021	190
J	Zhang, ZM; Dai, XW; Shan, GC; Li, G; Li, XJ; Liu, XB; Qin, F				Zhang, Zhimin; Dai, Xuewu; Shan, Guangcun; Li, Gang; Li, Xujie; Liu, Xiaobo; Qin, Fei			A low cost UV-IR dual wavelength optical sensor with Chirp modulation for in-situ chemical oxygen demand measurements	SENSORS AND ACTUATORS B-CHEMICAL			English	Article						COD measurement; Low cost; High accuracy; Chirp signal modulation; In-situ sensor	SYSTEM; COD	Chemical oxygen demand (COD) is one of the most representative indicators in water quality monitoring. Among numerous methodologies of COD measurement, optical method has received increasing interests as it can avoid secondary contamination and the frequent replacement of electrodes. However, different with the evolving progress of Infrared (IR) based turbidity sensor, the optical measurements of…	[Zhang, Zhimin; Qin, Fei] Univ Chinese Acad Sci, Sch Elect Elect & Communiat Engn, 1 Yanqi Lake East, Beijing 101408, Peoples R China; [Dai, Xuewu] Northumbria Univ, Dept Math Phys & Elect Engn, Newcastle Upon Tyne NE1 8ST,, England; [Shan, Guangcun] Beihang Univ, Sch Instrumentat Sci & Optoelect Engn, 37 Xueyuan Rd, Beijing 100191, Peoples R China; [Li, Gang] Minist Water Resources Peoples Repub…	Chinese Academy of Sciences; University of Chinese Academy of Sciences, CAS; Northumbria University; Beihang University; Hohai University; China Institute of Water Resources & Hydropower Research	Qin, F (corresponding author), Univ Chinese Acad Sci, Sch Elect Elect & Communiat Engn, 1 Yanqi Lake East, Beijing 101408, Peoples R China.	fqin1982@ucas.ac.cn	qin, fei/L-5557-2015	qin, fei/0000-0003-1671-8968	National Key R & D Program, China [FNSRFP-2021-YB-7]; Future Network Scientific Research Fund Project, China [2020028]; Provincial Water Science and Technology Program of Jiangsu, China [MS22021042]; People's Livelihood Technology in Nantong City, China; [2016YFC1402504]	National Key R & D Program, China; Future Network Scientific Research Fund Project, China; Provincial Water Science and Technology Program of Jiangsu, China; People's Livelihood Technology in Nantong City, China;	This work was supported in part by National Key R & D Program, China, under Grant 2016YFC1402504; in part by the Future Network Scientific Research Fund Project, China, under Grant FNSRFP-2021-YB-7; in part by the Provincial Water Science and Technology Program of Jiangsu, China, under Grant 2020028; and in part by Social and People's Livelihood Technology in Nantong City, China, under Grant MS22…		29	0	0	7	12	ELSEVIER SCIENCE SA	LAUSANNE	PO BOX 564, 1001 LAUSANNE, SWITZERLAND		0925-4005		SENSOR ACTUAT B-CHEM	Sens. Actuator B-Chem.	2023-11-15	2022	371
J	Bardaji, R; Sanchez, AM; Simon, C; Wernand, MR; Piera, J				Bardaji, Raul; Sanchez, Albert-Miquel; Simon, Carine; Wernand, Marcel R.; Piera, Jaume			Estimating the Underwater Diffuse Attenuation Coefficient with a Low-Cost Instrument: The KdUINO DIY Buoy	SENSORS			English	Article						light; do-it-yourself; diffuse attenuation coefficient; KdUINO; low-cost sensor; oceanography; buoy; citizen science; Arduino	LARGE SHALLOW LAKE; TAIHU; LIGHT	A critical parameter to assess the environmental status of water bodies is the transparency of the water, as it is strongly affected by different water quality related components (such as the presence of phytoplankton, organic matter and sediment concentrations). One parameter to assess the water transparency is the diffuse attenuation coefficient. However, the number of subsurface irradiance mea…	[Bardaji, Raul; Sanchez, Albert-Miquel; Simon, Carine; Piera, Jaume] CSIC, Inst Marine Sci, Dept Phys & Technol Oceanog, ICM, 37-49 Passeig Maritim Barceloneta, E-08003 Barcelona, Spain; [Wernand, Marcel R.] Royal Netherlands Inst Sea Res NIOZ, Dept Phys Oceanog, POB 59, NL-1790 AB Den Burg, Texel, Netherlands	Consejo Superior de Investigaciones Cientificas (CSIC); CSIC - Centro Mediterraneo de Investigaciones Marinas y Ambientales (CMIMA); CSIC - Instituto de Ciencias del Mar (ICM); Utrecht University; Royal Netherlands Institute for Sea Research (NIOZ)	Bardaji, R (corresponding author), CSIC, Inst Marine Sci, Dept Phys & Technol Oceanog, ICM, 37-49 Passeig Maritim Barceloneta, E-08003 Barcelona, Spain.	bardaji@icm.csic.es; amsanchez@icm.csic.es; carine.simon@csic.es; marcel.wernand@nioz.nl; jpiera@icm.csci.es	Simon, Carine/L-1219-2014; Piera, Jaume/AAP-4663-2021; Piera, Jaume/I-1152-2015	Simon, Carine/0000-0001-9951-5132; Piera, Jaume/0000-0001-5818-9836; Piera, Jaume/0000-0001-5818-9836; Bardaji, Raul/0000-0002-0803-3427; Sanchez, Albert-Miquel/0000-0001-9391-0043	Spanish National Research Council (CSIC) under the EU Citclops Project [FP7-ENV-308469]; MARduino project [FCT-13-6911]; Mestral Project [CTM2011-30489-C02-01]; Ramon y Cajal program	Spanish National Research Council (CSIC) under the EU Citclops Project; MARduino project; Mestral Project; Ramon y Cajal program(Spanish Government)	This work was supported by the Spanish National Research Council (CSIC) under the EU Citclops Project (FP7-ENV-308469), the MARduino project (FCT-13-6911) and the Mestral Project CTM2011-30489-C02-01. Carine Simon is currently funded by the Ramon y Cajal program. We would also like to show our gratitude to the Marc Codorniu for helping us with the experimental measurements, and we thank all the r…		18	24	24	0	23	MDPI	BASEL	ST ALBAN-ANLAGE 66, CH-4052 BASEL, SWITZERLAND	1424-8220			SENSORS-BASEL	Sensors	MAR	2016	16	3
J	Postolache, O; Pereira, JD; Girao, PS				Postolache, Octavian; Pereira, Jose Dias; Girao, Pedro Silva			Wireless sensor network-based solution for environmental monitoring: water quality assessment case study	IET SCIENCE MEASUREMENT & TECHNOLOGY			English	Article						wireless sensor networks; water quality; lakes; rivers; signal conditioning circuits; wireless sensor network; environmental monitoring; water quality assessment; low cost sensing nodes; low cost multiparameter sensing probe; surface waters; lakes; estuaries; rivers; urban areas; conductivity signal conditioning circuits; temperature signal conditioning circuits; turbidity signal conditioning cir…		The challenges of climate change, population growth, demographic change, urbanization and resource depletion mean that the world's great cities need to adapt to survive and thrive over the coming decades. Slashing greenhouse gas emissions to prevent catastrophic climate change, while maintaining or increasing quality of life, can be a costly and difficult process. Two factors that directly affect…	[Postolache, Octavian] Inst Telecomunicacoes, DCTI ISCTE IUL, Lisbon, Portugal; [Pereira, Jose Dias] Inst Telecomunicacoes, DSI EST IPS, Setubal, Portugal; [Girao, Pedro Silva] Inst Telecomunicacoes, DEEC IST UL, Lisbon, Portugal	Instituto de Telecomunicacoes; Instituto Universitario de Lisboa; Instituto de Telecomunicacoes	Postolache, O (corresponding author), Inst Telecomunicacoes, DCTI ISCTE IUL, Lisbon, Portugal.	opostolache@lx.it.pt	Girao, Pedro S/E-4214-2013; Girão, Pedro Silva/AAE-5865-2019; Postolache, Octavian Adrian/ADC-7853-2022; Postolache, Octavian/AAE-1343-2021	Girão, Pedro Silva/0000-0002-3499-5320; Postolache, Octavian Adrian/0000-0001-5055-6347; Pereira, Jose/0000-0002-0183-132X					19	25	27	1	55	INST ENGINEERING TECHNOLOGY-IET	HERTFORD	MICHAEL FARADAY HOUSE SIX HILLS WAY STEVENAGE, HERTFORD SG1 2AY, ENGLAND	1751-8822	1751-8830		IET SCI MEAS TECHNOL	IET Sci. Meas. Technol.	NOV	2014	8	6
J	Parra, L; Rocher, J; Escriva, J; Lloret, J				Parra, Lorena; Rocher, Javier; Escriva, Julia; Lloret, Jaime			Design and development of low cost smart turbidity sensor for water quality monitoring in fish farms	AQUACULTURAL ENGINEERING			English	Article						Turbidity sensor; Phytoplankton; Suspended sediment; Water quality; Fish farms	SUSPENDED SEDIMENT CONCENTRATION; GILL STRUCTURE; GROWTH; IMPACTS; CULTURE; CLARITY; LARVAE; LAKES	Turbidity monitoring is necessary in many cases and several sensors have been developed for this purpose. However, in some cases to quantify the turbidity it is not enough and its characterization is necessary. In fish farms, the increase of sedimentary or phytoplanktonic turbidity requires different actions to prevent further damages. For this reason, a sensor able to differentiate between turbi…	[Parra, Lorena; Rocher, Javier; Escriva, Julia; Lloret, Jaime] Univ Politecn Valencia, Inst Invest Gest Integrada Zonas Costeras, Valencia, Spain	Universitat Politecnica de Valencia	Parra, L (corresponding author), Univ Politecn Valencia, Inst Invest Gest Integrada Zonas Costeras, Valencia, Spain.	loparbo@doctor.upv.es; jarocmo@alumni.upv.es; juespe@epsg.upv.es; jlloret@dcom.upv.es	Parra, Lorena/AAB-1927-2021; Lloret, Jaime/H-3994-2013; Rocher, Javier/ADY-9974-2022	Parra, Lorena/0000-0001-9215-8734; Lloret, Jaime/0000-0002-0862-0533; Rocher Morant, Javier/0000-0003-0182-1671	Ministerio de Educacion, Cultura y Deporte, through the Ayudas para contratos predoctorales de Formacion del Profesorado Universitario FPU [FPU14/02953]; Conselleria de Educacion, Investigacion, Cultura y Deporte, through the Subvenciones para la contratacion de personal investigador de caracter [ACIF/2017/069]	Ministerio de Educacion, Cultura y Deporte, through the Ayudas para contratos predoctorales de Formacion del Profesorado Universitario FPU; Conselleria de Educacion, Investigacion, Cultura y Deporte, through the Subvenciones para la contratacion de personal investigador de caracter	This work has been partially supported by the Ministerio de Educacion, Cultura y Deporte, through the Ayudas para contratos predoctorales de Formacion del Profesorado Universitario FPU (Convocatoria 2014). Grant number FPU14/02953. This work has been partially supported by the Conselleria de Educacion, Investigacion, Cultura y Deporte, through the Subvenciones para la contratacion de personal inv…		40	43	47	4	38	ELSEVIER SCI LTD	OXFORD	THE BOULEVARD, LANGFORD LANE, KIDLINGTON, OXFORD OX5 1GB, OXON, ENGLAND	0144-8609	1873-5614		AQUACULT ENG	Aquac. Eng.	MAY	2018	81
J	Templin, T; Popielarczyk, D; Kosecki, R				Templin, Tomasz; Popielarczyk, Dariusz; Kosecki, Rafa			Application of Low-Cost Fixed-Wing UAV for Inland Lakes Shoreline Investigation	PURE AND APPLIED GEOPHYSICS			English	Article						UAV; DEM; bathymetry; morphometry; GNSS; Lake Suskie	UNMANNED AERIAL VEHICLES; FROM-MOTION PHOTOGRAMMETRY; INFORMATION-SYSTEM; TOPOGRAPHY; MODELS; RECONSTRUCTION; BATHYMETRY; RESERVOIR; DYNAMICS; IMAGERY	One of the most important factors that influences the performance of geomorphologic parameters on urban lakes is the water level. It fluctuates periodically, causing shoreline changes. It is especially significant for typical environmental studies like bathymetric surveys, morphometric parameters calculation, sediment depth changes, thermal structure, water quality monitoring, etc. In most reserv…	[Templin, Tomasz; Popielarczyk, Dariusz; Kosecki, Rafa] Univ Warmia & Mazury, Inst Geodesy, Oczapowskiego 1, PL-10719 Olsztyn, Poland	Institute of Geodesy & Cartography; University of Warmia & Mazury	Templin, T (corresponding author), Univ Warmia & Mazury, Inst Geodesy, Oczapowskiego 1, PL-10719 Olsztyn, Poland.	tomasz.templin@uwm.edu.pl	Popielarczyk, Dariusz/B-8896-2013; Templin, Tomasz/AAA-3265-2019	Popielarczyk, Dariusz/0000-0001-6589-8884; Templin, Tomasz/0000-0003-2188-0097					70	30	30	2	16	SPRINGER BASEL AG	BASEL	PICASSOPLATZ 4, BASEL, 4052, SWITZERLAND	0033-4553	1420-9136		PURE APPL GEOPHYS	Pure Appl. Geophys.	SEP	2018	175	9
J	Olivetti, D; Roig, H; Martinez, JM; Borges, H; Ferreira, A; Casari, R; Salles, L; Malta, E				Olivetti, Diogo; Roig, Henrique; Martinez, Jean-Michel; Borges, Henrique; Ferreira, Alexandre; Casari, Raphael; Salles, Leandro; Malta, Edio			Low-Cost Unmanned Aerial Multispectral Imagery for Siltation Monitoring in Reservoirs	REMOTE SENSING			English	Article						water quality; inland water; total suspended solids; remote sensing; UAV; remotely piloted aircraft; drone; Parrot Sequoia; urban drainage; reservoir	WATER-QUALITY; SUSPENDED SEDIMENTS; VEHICLE UAV; RIVER; AIRBORNE; REFLECTANCE; RETRIEVAL	The recent and continuous development of unmanned aerial vehicles (UAV) and small cameras with different spectral resolutions and imaging systems promotes new remote sensing platforms that can supply ultra-high spatial and temporal resolution, filling the gap between ground-based surveys and orbital sensors. This work aimed to monitor siltation in two large rural and urban reservoirs by recording…	[Olivetti, Diogo; Roig, Henrique; Borges, Henrique; Ferreira, Alexandre; Casari, Raphael; Salles, Leandro; Malta, Edio] Univ Brasilia, Inst Geosci, Campus Darcy Ribeiro,ICC Ala Cent CEP 70, BR-910900 Brasilia, DF, Brazil; [Martinez, Jean-Michel] Univ Toulouse 3, CNRS, Inst Rech Dev IRD, Geosci Environm Toulouse GET,UMR5563, 14 Ave Edouard Belin, F-31400 Toulouse, France	Universidade de Brasilia; Centre National de la Recherche Scientifique (CNRS); CNRS - National Institute for Earth Sciences & Astronomy (INSU); Universite de Toulouse; Universite Toulouse III - Paul Sabatier; Institut de Recherche pour le Developpement (IRD)	Olivetti, D (corresponding author), Univ Brasilia, Inst Geosci, Campus Darcy Ribeiro,ICC Ala Cent CEP 70, BR-910900 Brasilia, DF, Brazil.	150028351@aluno.unb.br; roig@unb.br; jean-michel.martinez@ird.fr; 180044443@aluno.unb.br; alexandre.ferreira@terrasense.com.br; 180133799@aluno.unb.br; 150168853@aluno.unb.br; edio.malta@ana.gov.br	Martinez, Jean-Michel Albert/AAK-4410-2020	Martinez, Jean-Michel Albert/0000-0003-3281-8512; Salles, Leandro/0000-0002-6056-7055	Financiadora de Estudos e Projetos (FINEP) [01.14.0114.00]; Fundacao de Amparo a Pesquisa do Distrito Federal (FAPDF) [23547.93.27555.30052018, 17457.78.36995.26042017]; Coordenacao de Aperfeicoamento de Pessoal de Nivel Superior-Brasil (CAPES) [001]	Financiadora de Estudos e Projetos (FINEP)(Financiadora de Inovacao e Pesquisa (Finep)); Fundacao de Amparo a Pesquisa do Distrito Federal (FAPDF)(Fundacao de Apoio a Pesquisa do Distrito Federal (FAPDF)); Coordenacao de Aperfeicoamento de Pessoal de Nivel Superior-Brasil (CAPES)(Coordenacao de Aperfeicoamento de Pessoal de Nivel Superior (CAPES))	This research was funded by Financiadora de Estudos e Projetos (FINEP) grant number 01.14.0114.00, by the Fundacao de Amparo a Pesquisa do Distrito Federal (FAPDF) grant numbers 23547.93.27555.30052018 and 17457.78.36995.26042017, and by the Coordenacao de Aperfeicoamento de Pessoal de Nivel Superior-Brasil (CAPES)-Finance Code 001.		45	20	20	1	27	MDPI	BASEL	ST ALBAN-ANLAGE 66, CH-4052 BASEL, SWITZERLAND		2072-4292		REMOTE SENS-BASEL	Remote Sens.	JUN	2020	12	11
J	Kumar, DS; Askarunisa, A; Kumar, RM				Kumar, D. Senthil; Askarunisa, A.; Kumar, R. Mohan			Embedded processor based automated assessment of quality of the water in an IoT background	MICROPROCESSORS AND MICROSYSTEMS			English	Article						Quality of fresh water; IOT; Parameters U-D00*86 Ultra data processor; Teensy ++2.0 microcontroller		For the life of human beings, water is necessary. While nearly 70% of the earth is drained, just 3% are known to be fresh water. Moreover, approximately 2.6% of the cooling water is not accessible to people. They are either trapped in glaciers and polar ice caps, contained in the soil or water, heavily poisoned, or unnecessarily drained below the Earth's surface. So only 0.4% of the drinkable wat…	[Kumar, D. Senthil] KLN Coll Informat & Technol, Dept Elect & Commun Engn, Pottapalyam, India; [Askarunisa, A.] KLN Coll Informat & Technol, Comp Sci & Engn, Pottapalyam, India; [Kumar, R. Mohan] KLN Coll Engn, Dept Elect & Commun Engn, Pottapalyam, India		Kumar, DS (corresponding author), KLN Coll Informat & Technol, Dept Elect & Commun Engn, Pottapalyam, India.	senthilkumarmadhu2019@gmail.com							25	3	3	1	7	ELSEVIER	AMSTERDAM	RADARWEG 29a, 1043 NX AMSTERDAM, NETHERLANDS	0141-9331	1872-9436		MICROPROCESS MICROSY	Microprocess. Microsyst.	SEP	2020	77
J	Makowski, L				Makowski, Lukasz			Low-cost Laboratory Stand for Turbidity Measurements	ELEKTRONIKA IR ELEKTROTECHNIKA			English	Article						Optoelectronic devices; laser applications; optical sensors; pollution measurement; environmental monitoring		Fresh water becomes scarcity not only worldwide but also in some developed countries. Therefore there is more and more attention paid to quality of this exceptional natural resource. Clarity or its inverse known as turbidity is key feature of water characteristic. Smaller, easier to use and more convenient device to measure this parameter could be constructed with significantly lowered costs than…	[Makowski, Lukasz] Warsaw Univ Technol, Fac Elect Engn, Ul Koszykowa 75, PL-00662 Warsaw, Poland	Warsaw University of Technology	Makowski, L (corresponding author), Warsaw Univ Technol, Fac Elect Engn, Ul Koszykowa 75, PL-00662 Warsaw, Poland.	lukasz.makowski@ee.pw.edu.pl		Makowski, Lukasz/0000-0002-4586-6890	Faculty of Electrical Engineering at Warsaw University of Technology	Faculty of Electrical Engineering at Warsaw University of Technology	This research was funded by a statutory funding from the Faculty of Electrical Engineering at Warsaw University of Technology. This research was performed in cooperation with the Institution.		9	3	3	0	3	KAUNAS UNIV TECHNOLOGY	KAUNAS	KAUNAS UNIV TECHNOL, DEPT ELECTRONICS ENGINEERING, STUDENTU STR 50, KAUNAS, LT-51368, LITHUANIA	1392-1215			ELEKTRON ELEKTROTECH	Elektron. Elektrotech.		2016	22	1
J	Droujko, J; Molnar, P				Droujko, Jessica; Molnar, Peter			Open-source, low-cost, in-situ turbidity sensor for river network monitoring	SCIENTIFIC REPORTS			English	Article							SUSPENDED SEDIMENT; PARTICLE-SIZE; CATCHMENT; DYNAMICS; EROSION; FLUX; CONNECTIVITY; TRANSPORT; IMPACTS; EXPORT	Fine sediment transport in rivers is important for catchment nutrient fluxes, global biogeochemical cycles, water quality and pollution in riverine, coastal and marine ecosystems. Monitoring of suspended sediment in rivers with current sensors is challenging and expensive and most monitoring setups are restricted to few single site measurements. To better understand the spatial heterogeneity of f…	[Droujko, Jessica; Molnar, Peter] Swiss Fed Inst Technol, Inst Environm Engn, CH-8093 Zurich, Switzerland	Swiss Federal Institutes of Technology Domain; ETH Zurich	Droujko, J (corresponding author), Swiss Fed Inst Technol, Inst Environm Engn, CH-8093 Zurich, Switzerland.	droujko@ifu.baug.ethz.ch			ETH Research Grant [ETH-13 19-1]	ETH Research Grant	We thank the Laboratory of Hydraulics, Hydrology and Glaciology (VAW, Prof. Dr. R. Boes) for providing laboratory facilities, the commercially available turbidimeters and the sediment particles for the tests. We thank Ruben Stadler, Michael Arnold, and Dr. David Felix (VAW) for providing guidance and assistance. This research was funded by the ETH Research Grant ETH-13 19-1.		59	2	2	8	20	NATURE PORTFOLIO	BERLIN	HEIDELBERGER PLATZ 3, BERLIN, 14197, GERMANY	2045-2322			SCI REP-UK	Sci Rep	2023-06-20	2022	12	1
J	Verma, G				Verma, Gaurav			Low Cost Smart Ground System for Rainwater Harvesting for Indian Houses using IoT Technology	WIRELESS PERSONAL COMMUNICATIONS			English	Article						Rainwater; Arduino Nano; NodeMCU; IoT; Sensors; Cost analysis		Water conservation is critical because it is one of the most significant factors for all species' survival. According to the Central Ground Water Board's estimates, underground water will be scarce in 15 Indian states by 2025 (Firstpost. Two-third of the world, much of India to face water scarcity, stress by 2025: Expert, 2018). However, as per the report from Ministry of Environment and Forest, …	[Verma, Gaurav] Jaypee Inst Informat Technol, Dept Elect & Commun Engn, A-10,Sect 62, Noida, Uttar Pradesh, India	Jaypee Institute of Information Technology (JIIT)	Verma, G (corresponding author), Jaypee Inst Informat Technol, Dept Elect & Commun Engn, A-10,Sect 62, Noida, Uttar Pradesh, India.	gaurav.iitkg@gmail.com	Verma, Dr. Gaurav/ITW-0336-2023						20	0	0	2	4	SPRINGER	NEW YORK	ONE NEW YORK PLAZA, SUITE 4600, NEW YORK, NY, UNITED STATES	0929-6212	1572-834X		WIRELESS PERS COMMUN	Wirel. Pers. Commun.	OCT	2022	126	4
J	Okpara, EC; Sehularo, BE; Wojuola, OB				Okpara, Enyioma C.; Sehularo, Boikanyo E.; Wojuola, Olanrewaju B.			On-line water quality inspection system: the role of the wireless sensory network	ENVIRONMENTAL RESEARCH COMMUNICATIONS			English	Review						Wireless sensor network; water quality; water quality parameters; real-time and remote monitoring	MONITORING-SYSTEM; DISSOLVED-OXYGEN; DRINKING-WATER; DESIGN; RIVER	There is an increasing dependence on freshwater sources for various human activities because of population growth and rising industrialization across the globe. Meanwhile, the safety of available freshwater is threatened by the massive generation of waste from increasing domestic and industrial activities. The need for continuous assessment of the quality of the environmental water available has …	[Okpara, Enyioma C.; Sehularo, Boikanyo E.; Wojuola, Olanrewaju B.] North West Univ, Fac Nat & Agr, Dept Phys, Sci, Mafikeng Campus,Private Bag X2046, ZA-2735 Mmabatho, South Africa	North West University - South Africa	Okpara, EC (corresponding author), North West Univ, Fac Nat & Agr, Dept Phys, Sci, Mafikeng Campus,Private Bag X2046, ZA-2735 Mmabatho, South Africa.	ebrochima@gmail.com		Wojuola, Olanrewaju/0000-0002-0558-8224; Chimaijem, Enyioma/0000-0002-5884-3882	North-West University; Department of Physics	North-West University; Department of Physics	The authors do acknowledge the North-West University, and the Department of Physics for their financial support and research facilities.		94	0	0	15	27	IOP Publishing Ltd	BRISTOL	TEMPLE CIRCUS, TEMPLE WAY, BRISTOL BS1 6BE, ENGLAND	2515-7620			ENVIRON RES COMMUN	Environ. Res. Commun.	2023-10-01	2022	4	10
J	Kirkey, WD; Bonner, JS; Fuller, CB				Kirkey, William D.; Bonner, James S.; Fuller, Christopher B.			Low-Cost Submersible Turbidity Sensors Using Low-Frequency Source Light Modulation	IEEE SENSORS JOURNAL			English	Article						Environmental monitoring; fluorescence; fluorometer; nephelometer; optical backscatter; turbidimeter; turbidity sensor; underwater technology; water quality	SUSPENDED SEDIMENT CONCENTRATION; OPTICAL SENSOR; BACKSCATTERING; SCATTERING; WATERS; SEA; COEFFICIENT; DIRECTION; SYSTEM; MATTER	Submersible turbidimeter and fluorometer design generally involves tradeoffs between ambient light rejection, sensitivity, and cost. We introduce an optical backscatter transducer in which the light source is modulated with a low-frequency (tens of Hz) square wave, with a detection scheme that mitigates the effects of external interference from ambient light and from 50- and 60-Hz sources. With t…	[Kirkey, William D.] Clarkson Univ, Wallace H Coulter Sch Engn, Potsdam, NY 13699 USA; [Bonner, James S.] Clarkson Univ, Dept Civil & Environm Engn, Potsdam, NY 13699 USA; [Fuller, Christopher B.] Fugro USA Marine Inc, Houston, TX 77081 USA	Clarkson University; Clarkson University	Kirkey, WD (corresponding author), Clarkson Univ, Wallace H Coulter Sch Engn, Potsdam, NY 13699 USA.	wkirkey@clarkson.edu; ner@clarkson.edu; cfuller900@gmail.com	Kirkey, William D/U-7960-2017	Kirkey, William/0000-0002-9212-382X	Clarkson University's Beacon Institute for Rivers and Estuaries; New York State Assembly	Clarkson University's Beacon Institute for Rivers and Estuaries; New York State Assembly	This work was supported in part by the Clarkson University's Beacon Institute for Rivers and Estuaries and in part by a New York State Assembly appropriation made possible by Assemblywoman Addie Jenne. The associate editor coordinating the review of this paper and approving it for publication was Prof. Aime Lay-Ekuakille.		45	9	9	1	27	IEEE-INST ELECTRICAL ELECTRONICS ENGINEERS INC	PISCATAWAY	445 HOES LANE, PISCATAWAY, NJ 08855-4141 USA	1530-437X	1558-1748		IEEE SENS J	IEEE Sens. J.	2023-11-15	2018	18	22
J	Zazo, S; Rodriguez-Gonzalvez, P; Molina, JL; Hernandez-Lopez, D; Gonzalez-Aguilera, D				Zazo, S.; Rodriguez-Gonzalvez, P.; Molina, J-L; Hernandez-Lopez, D.; Gonzalez-Aguilera, D.			Flood Analysis Supported by Low-cost Geometric Modelling	RIVER RESEARCH AND APPLICATIONS			English	Article						flood analysis; river geomorphology; fluvial hydraulic; DEM accuracy; structure from motion (SfM); digital photogrammetry on-demand (DPod)	STRUCTURE-FROM-MOTION; RESOLUTION; UNCERTAINTY; TOPOGRAPHY; ACCURACY; SENSORS; RIVERS	Today, it is increasingly clear that non-stationarity hydrological and hydraulic variables and processes are occurring largely because of global warming. Accordingly, extreme hydrological events are becoming more common over time, and their effects are creating greater negative impacts on the environment (fluvial geomorphology and floodplains) and society (flood damage). Given this situation, the…	[Zazo, S.; Rodriguez-Gonzalvez, P.; Molina, J-L; Gonzalez-Aguilera, D.] Univ Salamanca, High Polytech Sch Engn, Hornos Caleros 50, Avila 05003, Spain; [Hernandez-Lopez, D.] Univ Castilla La Mancha, Inst Reg Dev IDR, Campus Univ S-N, Albacete 02071, Spain	University of Salamanca; Universidad de Castilla-La Mancha	Zazo, S (corresponding author), Salamanca Univ, High Polytechn Sch Engn, Area Hydraul Engn, Ave Hornos Caleros 50, Avila 05003, Spain.	szazo@usal.es	Hernandez, David/IAP-1221-2023; Molina, José-Luis/B-5796-2013; Zazo, Santiago/J-7583-2017; Rodríguez-Gonzálvez, Pablo/H-8820-2015; Zazo, Santiago/R-6580-2019; Hernandez-Lopez, David/B-4372-2017	Molina, José-Luis/0000-0002-1001-3601; Rodríguez-Gonzálvez, Pablo/0000-0002-2657-813X; Zazo, Santiago/0000-0002-0265-1590; Gonzalez-Aguilera, Diego/0000-0002-8949-4216; Hernandez-Lopez, David/0000-0001-9874-5243	GESINH-IMPADAPT project of the Spanish Ministry of Economy and Competitiveness (Plan Estatal I+C+T+I) [CGL2013-48424-C2-2-R]	GESINH-IMPADAPT project of the Spanish Ministry of Economy and Competitiveness (Plan Estatal I+C+T+I)	This research has been partially supported by the GESINH-IMPADAPT project (CGL2013-48424-C2-2-R) of the Spanish Ministry of Economy and Competitiveness (Plan Estatal I+C+T+I 2013-2016).		47	4	4	0	24	WILEY	HOBOKEN	111 RIVER ST, HOBOKEN 07030-5774, NJ USA	1535-1459	1535-1467		RIVER RES APPL	River Res. Appl.	MAY	2017	33	4
J	Whig, P; Ahmad, SN				Whig, Pawan; Ahmad, Syed Naseem			DEVELOPMENT OF ECONOMICAL ASIC FOR PCS FOR WATER QUALITY MONITORING	JOURNAL OF CIRCUITS SYSTEMS AND COMPUTERS			English	Article						Biological oxygen demand; potentiometric; photo catalytic sensor; environment	H+-SENSITIVE FETS	In this paper, the design of an ASIC is presented that implement a low-cost system for the supervision of water quality in urban areas or rivers. Photo catalytic sensor (PCS) estimates the parameter biological oxygen demand (BOD) which is generally used to estimate quality of water. The system proposed in this paper involves a simple potentiometric approach that provides a correlation in the inpu…	[Whig, Pawan; Ahmad, Syed Naseem] Jamia Millia Islamia, Dept Elect & Commun Engn, New Delhi 110025, India	Jamia Millia Islamia	Whig, P (corresponding author), Jamia Millia Islamia, Dept Elect & Commun Engn, New Delhi 110025, India.	pawanwhig@gmail.com; snahmad@jmi.ac.in	whig, pawan/G-7724-2015	whig, pawan/0000-0003-1863-1591					18	2	2	0	9	WORLD SCIENTIFIC PUBL CO PTE LTD	SINGAPORE	5 TOH TUCK LINK, SINGAPORE 596224, SINGAPORE	0218-1266	1793-6454		J CIRCUIT SYST COMP	J. Circuits Syst. Comput.	JUL	2014	23	6
J	Rocher, J; Parra, L; Jimenez, JM; Lloret, J; Basterrechea, DA				Rocher, Javier; Parra, Lorena; Jimenez, Jose M.; Lloret, Jaime; Basterrechea, Daniel A.			Development of a Low-Cost Optical Sensor to Detect Eutrophication in Irrigation Reservoirs	SENSORS			English	Article						turbidity; sediment; alga; light absorption; water quality; irrigation channel	BIODIVERSITY	In irrigation ponds, the excess of nutrients can cause eutrophication, a massive growth of microscopic algae. It might cause different problems in the irrigation infrastructure and should be monitored. In this paper, we present a low-cost sensor based on optical absorption in order to determine the concentration of algae in irrigation ponds. The sensor is composed of 5 LEDs with different wavelen…	[Rocher, Javier; Parra, Lorena; Jimenez, Jose M.; Lloret, Jaime; Basterrechea, Daniel A.] Univ Politecn Valencia, Inst Invest Gest Integrada Zonas Costeras, Valencia 46730, Spain; [Parra, Lorena] Finca El Encin Inst Madrileno Invest & Desarrollo, A-2,Km 38,2, Alcala De Henares 28805, Spain	Universitat Politecnica de Valencia	Lloret, J (corresponding author), Univ Politecn Valencia, Inst Invest Gest Integrada Zonas Costeras, Valencia 46730, Spain.	jarocmo@doctor.upv.es; loparbo@doctor.upv.es; jojiher@dcom.upv.es; jlloret@dcom.upv.es; dabasche@epsg.upv.es	Lloret, Jaime/H-3994-2013; Parra, Lorena/AAB-1927-2021; Rocher, Javier/ADY-9974-2022; Jimenez, Jose Miguel/AAA-3627-2021	Lloret, Jaime/0000-0002-0862-0533; Parra, Lorena/0000-0001-9215-8734; Jimenez, Jose Miguel/0000-0002-3688-7235; Basterrechea, Daniel Andoni/0000-0001-8542-9620; Rocher Morant, Javier/0000-0003-0182-1671	Ministerio de Educacion, Cultura y Deporte [FPU16/05540]; Conselleria de Educacion, Cultura y Deporte [APOSTD/2019/04]	Ministerio de Educacion, Cultura y Deporte(Spanish Government); Conselleria de Educacion, Cultura y Deporte	This work is partially funded by the Ministerio de Educacion, Cultura y Deporte through theAyudas para contratacion pre-doctoral de Formacion del Profesorado Universitario FPU (Convocatoria 2016) grant number FPU16/05540 and by the Conselleria de Educacion, Cultura y Deporte through the Subvenciones para la contratacion de personal investigador en fase postdoctoral, grant number APOSTD/2019/04.		32	1	1	2	6	MDPI	BASEL	ST ALBAN-ANLAGE 66, CH-4052 BASEL, SWITZERLAND		1424-8220		SENSORS-BASEL	Sensors	NOV	2021	21	22
J	Zheng, TS; Bergin, MH; Johnson, KK; Tripathi, SN; Shirodkar, S; Landis, MS; Sutaria, R; Carlson, DE				Zheng, Tongshu; Bergin, Michael H.; Johnson, Karoline K.; Tripathi, Sachchida N.; Shirodkar, Shilpa; Landis, Matthew S.; Sutaria, Ronak; Carlson, David E.			Field evaluation of low-cost particulate matter sensors in high-and low-concentration environments	ATMOSPHERIC MEASUREMENT TECHNIQUES			English	Article							AIR-POLLUTION; LABORATORY EVALUATION; MASS CONCENTRATION; RELATIVE-HUMIDITY; PERFORMANCE; AMBIENT; CALIBRATION; NETWORK; PM2.5	Low-cost particulate matter (PM) sensors are promising tools for supplementing existing air quality monitoring networks. However, the performance of the new generation of low-cost PM sensors under field conditions is not well understood. In this study, we characterized the performance capabilities of a new low-cost PM sensor model (Plan-tower model PMS3003) for measuring PM2.5 at 1 min, 1 h, 6 h,…	[Zheng, Tongshu; Bergin, Michael H.; Johnson, Karoline K.; Carlson, David E.] Duke Univ, Dept Civil & Environm Engn, Durham, NC 27708 USA; [Tripathi, Sachchida N.; Shirodkar, Shilpa] Indian Inst Technol Kanpur, Dept Civil Engn, Kanpur 208016, Uttar Pradesh, India; [Landis, Matthew S.] US EPA, Off Res & Dev, Res Triangle Pk, NC 27711 USA; [Sutaria, Ronak] Indian Inst Technol, Ctr Urban Sci & Engn,…	Duke University; Indian Institute of Technology System (IIT System); Indian Institute of Technology (IIT) - Kanpur; United States Environmental Protection Agency; Indian Institute of Technology System (IIT System); Indian Institute of Technology (IIT) - Bombay; Duke University	Zheng, TS (corresponding author), Duke Univ, Dept Civil & Environm Engn, Durham, NC 27708 USA.	tongshu.zheng@duke.edu	Landis, Matthew S/P-5149-2014; Tripathi, Sachchida N/J-4840-2016; Barkjohn, Karoline/J-3711-2019	Landis, Matthew S/0000-0002-8742-496X; Barkjohn, Karoline/0000-0001-6197-4499; Carlson, David/0000-0003-1005-6385	Research Initiative for Real-time River Water and Air Quality Monitoring program - Department of Science and Technology, Government of India; Intel Corporation	Research Initiative for Real-time River Water and Air Quality Monitoring program - Department of Science and Technology, Government of India; Intel Corporation(Intel Corporation)	Sachchida N. Tripathi, Shilpa Shirodkar, and Ronak Sutaria are supported under the Research Initiative for Real-time River Water and Air Quality Monitoring program funded by the Department of Science and Technology, Government of India and Intel Corporation, and administered by the Indo-U.S. Science and Technology Forum. The authors would like to thank Tim Hanley at EPA OAQPS for providing the ra…		48	174	179	9	69	COPERNICUS GESELLSCHAFT MBH	GOTTINGEN	BAHNHOFSALLEE 1E, GOTTINGEN, 37081, GERMANY	1867-1381	1867-8548		ATMOS MEAS TECH	Atmos. Meas. Tech.	2023-08-22	2018	11	8
J	Srivastava, S; Vaddadi, S; Sadistap, S				Srivastava, Satyam; Vaddadi, Saikrishna; Sadistap, Shashikant			Smartphone-based System for water quality analysis	APPLIED WATER SCIENCE			English	Article						Water quality sensors; Portable embedded system; Water quality index	END	Water quality in rural areas is difficult to monitor due to lack of connectivity from different water laboratories. In other areas, location-based real-time water quality data collection is a tedious job and highly dependent on human intervention. The presented paper introduces a low-cost battery operated smartphone-based embedded system design to measure different water quality parameters in var…	[Srivastava, Satyam; Vaddadi, Saikrishna; Sadistap, Shashikant] CSIR CEERI, AcSiR, Jhunjhunu 333031, Rajasthan, India	Academy of Scientific & Innovative Research (AcSIR); Council of Scientific & Industrial Research (CSIR) - India; CSIR - Central Electronics Engineering Research Institute (CEERI)	Srivastava, S (corresponding author), CSIR CEERI, AcSiR, Jhunjhunu 333031, Rajasthan, India.	satyamsrivastava@ceeri.res.in; sai@ceeri.res.in; shashikant_s@ceeri.res.in							39	23	23	6	20	SPRINGER HEIDELBERG	HEIDELBERG	TIERGARTENSTRASSE 17, D-69121 HEIDELBERG, GERMANY	2190-5487	2190-5495		APPL WATER SCI	Appl. Water Sci.	SEP	2018	8	5
J	Ingles, JMDFP; Louw, TM; Booysen, MJ				Ingles, J. M. D. F. P.; Louw, T. M.; Booysen, M. J.			Water quality assessment using a portable UV optical absorbance nitrate sensor with a scintillator and smartphone camera	WATER SA			English	Article						water quality; nitrates; spectroscopic analysis; UV absorbance analysis; smartphone; developing country	WASTE-WATER; LOW-COST; SPECTROMETER; FLUORIDE; NITRITE; DESIGN	Nitrate contamination of water sources is a global environmental concern. A major source of pollution is agricultural runoff, which can contain decomposed organic matter, fertilizer, and animal or human waste. Nitrate adversely affects the stability of water systems such as dams and rivers and thus also public health. Regulation is essential but difficult to implement, given that measuring nitrat…	[Ingles, J. M. D. F. P.; Booysen, M. J.] Stellenbosch Univ, Dept E&E Engn, Stellenbosch, South Africa; [Louw, T. M.] Stellenbosch Univ, Dept Proc Engn, Stellenbosch, South Africa	Stellenbosch University; Stellenbosch University	Booysen, MJ (corresponding author), Stellenbosch Univ, Dept E&E Engn, Stellenbosch, South Africa.	mjbooysen@sun.ac.za	Booysen, MJ/AAF-6029-2019	Booysen, MJ/0000-0003-2817-2069; Louw, Tobias/0000-0002-4166-0799	MTN South Africa through the MTN Mobile Intelligence Lab	MTN South Africa through the MTN Mobile Intelligence Lab	The authors would like to thank MTN South Africa for their financial and technical support through the MTN Mobile Intelligence Lab.		25	4	4	7	24	WATER RESEARCH COMMISSION	PRETORIA	PO BOX 824, PRETORIA 0001, SOUTH AFRICA	0378-4738	1816-7950		WATER SA	Water SA	JAN	2021	47	1
J	Priya, SK; Shenbagalakshmi, G; Revathi, T				Priya, S. Kavi; Shenbagalakshmi, G.; Revathi, T.			Architecture of Smart Sensors for Real Time Drinking Water Quality and Contamination Detection in Water Distributed Mains	ROMANIAN JOURNAL OF INFORMATION SCIENCE AND TECHNOLOGY			English	Article						Water quality monitoring; wireless sensor network; fuzzy logic; water distribution mains; network lifetime; ZigBee protocol; In Pipe; Contamination detection	SYSTEM	Drinking Water Distribution Mains carry portable water from many water resources like reservoirs, river, and water tanks for industrial, commercial and residential consumers purposes through complex buried pipe networks. Predicting the consequences of a water contamination event is important in the field of water systems security and in drinking water distribution mains.The proposed work represen…	[Priya, S. Kavi; Shenbagalakshmi, G.; Revathi, T.] Mepco Schlenk Engn Coll Autonomous, Dept Informat Technol, Sivakasi, India	Mepco Schlenk Engineering College	Priya, SK (corresponding author), Mepco Schlenk Engn Coll Autonomous, Dept Informat Technol, Sivakasi, India.	urskavi@mepcoeng.ac.in; shenbagalakshmi@mepcoeng.ac.in; trevathi@mepcoeng.ac.in	G, Shenbagalakshmi/AAW-8661-2021; S, Priya Kavi/AAC-3342-2022; Thiagarajan, REVATHI/T-2901-2019; Gunasekaran, Shenbagalakshmi/AFN-6242-2022	S, Priya Kavi/0000-0003-0173-7955; Thiagarajan, REVATHI/0000-0002-2024-9933; Gunasekaran, Shenbagalakshmi/0000-0002-8784-1747	Department of Science and Technology; Government of India under Water Technology Initiative (WTI) scheme [DST/TM/WTI/2K14/216]	Department of Science and Technology; Government of India under Water Technology Initiative (WTI) scheme	This work is jointly supported by Department of Science and Technology; Government of India under Water Technology Initiative (WTI) scheme with [Grant Number: DST/TM/WTI/2K14/216]. The authors express their sincere gratitude to Dr.Neelima Alam, Scientist-D, Technology Mission Cell, Department of Science and Technology, Govt. of India, New Delhi for encouragement and guidance. We also acknowledge …		27	7	7	1	12	EDITURA ACAD ROMANE	BUCURESTI	CALEA 13 SEPTEMBRIE NR 13, SECTOR 5, BUCURESTI 050711, ROMANIA	1453-8245			ROM J INF SCI TECH	Rom. J. Inform. Sci. Technol.		2019	22	2023-03-04
J	Cucchi, K; Riviere, A; Baudin, A; Berrhouma, A; Durand, V; Rejiba, F; Rubin, Y; Flipo, N				Cucchi, Karina; Riviere, Agnes; Baudin, Aurelien; Berrhouma, Asma; Durand, Veronique; Rejiba, Faycal; Rubin, Yoram; Flipo, Nicolas			LOMOS-mini: A coupled system quantifying transient water and heat exchanges in streambeds	JOURNAL OF HYDROLOGY			English	Article						Groundwater-surface water interactions; Hyporheic zone; Experimental methods; Low-cost; Temperature/pressure sensors; In situ measurements	SURFACE-WATER; HYPORHEIC ZONE; SEEPAGE METER; GROUNDWATER; VARIABILITY; FLUXES; STATE	The LOMOS-mini is a new experimental system monitoring transient water and heat fluxes in the hyporheic zone at a sub-daily resolution. Given the coupling of high-frequency hydraulic head gradient and temperature measurements, its innovation when compared to currently available monitoring systems is to operate under transient conditions and to allow the quantification of coupled water and heat ex…	[Cucchi, Karina; Riviere, Agnes; Baudin, Aurelien; Berrhouma, Asma; Flipo, Nicolas] PSL Res Univ, Geosci Dept, Mines ParisTech, Paris, France; [Cucchi, Karina; Rubin, Yoram] Univ Calif Berkeley, Dept Civil & Environm Engn, Berkeley, CA 94720 USA; [Durand, Veronique] Univ Paris Sud, Lab GEOPS, CNRS, UMR Bat 8148 504, F-91405 Orsay, France; [Rejiba, Faycal] UPMC Univ Paris 06, Sorbonne Univ, CNRS, …	UDICE-French Research Universities; Universite PSL; MINES ParisTech; University of California System; University of California Berkeley; Centre National de la Recherche Scientifique (CNRS); UDICE-French Research Universities; Universite Paris Saclay; Centre National de la Recherche Scientifique (CNRS); CNRS - Institute of Ecology & Environment (INEE); UDICE-French Research Universities; Sorbonne …	Cucchi, K (corresponding author), PSL Res Univ, Geosci Dept, Mines ParisTech, Paris, France.	karina.cucchi@mines-paristech.fr	Rivière, Agnès/C-6130-2019; Rivière, Agnès/AAF-4699-2019; Rejiba, Fayçal/AAU-8915-2020	Rivière, Agnès/0000-0002-6002-3189; Rivière, Agnès/0000-0002-6002-3189; Cucchi, Karina/0000-0001-9907-6432; Rejiba, Faycal/0000-0001-7557-5413; Flipo, Nicolas/0000-0002-8099-2104	PIREN-Seine; project Traversiere of the French Institute Carnot M.I.N.E.S.; Chateaubriand Fellowship of the Office for Science & Technology of the Embassy of France in the United States; Jane Lewis fellowship from the University of California, Berkeley; IRSN	PIREN-Seine; project Traversiere of the French Institute Carnot M.I.N.E.S.; Chateaubriand Fellowship of the Office for Science & Technology of the Embassy of France in the United States; Jane Lewis fellowship from the University of California, Berkeley; IRSN	This material is based upon research supported by the PIREN-Seine, the project Traversiere of the French Institute Carnot M.I.N.E.S., the Chateaubriand Fellowship of the Office for Science & Technology of the Embassy of France in the United States, and the Jane Lewis fellowship from the University of California, Berkeley. The authors thank Dr. Christelle Courbet from IRSN for funding the construc…		33	5	5	0	13	ELSEVIER	AMSTERDAM	RADARWEG 29, 1043 NX AMSTERDAM, NETHERLANDS	0022-1694	1879-2707		J HYDROL	J. Hydrol.	JUN	2018	561
J	Zeng, TL; Wen, ZY; Wen, ZQ; Zhang, ZW; Wei, KL				Zeng Tian-ling; Wen Zhi-yu; Wen Zhong-quan; Zhang Zhong-wei; Wei Kang-lin			Research Progress in Water Quality Monitoring Technology Based on Ultraviolet Spectrum Analysis	SPECTROSCOPY AND SPECTRAL ANALYSIS			Chinese	Article						Ultraviolet spectrum analysis; Water quality monitoring; Micro spectrometer; Multi-parameter	NITRATE; SENSORS	The water quality monitoring technology based on ultraviolet spectrum analysis has the characteristics of small volume, low cost, and no secondary pollution, and it doesn't need any reagent and sample pretreatment. On account of these characteristics, the direct ultra-violet technology has remarkable superiority over traditional technologies when applied in online monitoring of drinking water, su…	[Zeng Tian-ling; Wen Zhi-yu; Wen Zhong-quan; Zhang Zhong-wei] Chongqing Univ, Key Lab Fundamental Sci Micro Nanodevice & Syst T, Chongqing 400030, Peoples R China; [Zeng Tian-ling; Wen Zhi-yu; Wen Zhong-quan; Zhang Zhong-wei] Chongqing Univ, Microsyst Res Ctr, Chongqing 400030, Peoples R China; [Wei Kang-lin] China Three Gorge Univ, Coll Sci, Yichang 443002, Peoples R China	Chongqing University; Chongqing University	Zeng, TL (corresponding author), Chongqing Univ, Key Lab Fundamental Sci Micro Nanodevice & Syst T, Chongqing 400030, Peoples R China.	tlzeng@foxmail.com	Zhang, Zhong-wei/I-8219-2012	Zhang, Zhong-wei/0000-0001-5167-9242					25	3	4	8	47	OFFICE SPECTROSCOPY & SPECTRAL ANALYSIS	BEIJING	NO 76 COLLAGE SOUTH RD BEIJING, BEIJING 100081, PEOPLES R CHINA	1000-0593			SPECTROSC SPECT ANAL	Spectrosc. Spectr. Anal.	APR	2013	33	4
J	Mimouni, E; Ridal, JJ; Skufca, JD; Twiss, MR				Mimouni, El-Amine; Ridal, Jeffrey J.; Skufca, Joseph D.; Twiss, Michael R.			A multiscale approach to water quality variables in a river ecosystem	ECOSPHERE			English	Article						limnology; modeling; rivers; scale; temporal scale; water quality	CODEPENDENCE ANALYSIS; SPATIAL STRUCTURE; WAVE-PROPAGATION; SAMPLING THEORY; SCALE; SELECTION; PATTERN; COMMUNITIES; REGRESSION; ORDINATION	Monitoring select ecosystem variables across time and interpreting the collected data are essential components of ecosystem assessment supporting management. Increasingly affordable sensors and computational capacity have made very large dataset assembly more common. However, these datasets initiate analytical challenges by their size and theoretical challenges due to the scale of the processes t…	[Mimouni, El-Amine; Ridal, Jeffrey J.] River Inst, Cornwall, ON, Canada; [Skufca, Joseph D.] Clarkson Univ, Dept Math, Potsdam, NY 13699 USA; [Twiss, Michael R.] Clarkson Univ, Dept Biol, Potsdam, NY 13699 USA	Clarkson University; Clarkson University	Mimouni, E (corresponding author), River Inst, Cornwall, ON, Canada.	elamine.mimouni89@gmail.com			Ontario Ministry of the Environment and Climate Change; Five B Family Foundation; National Research Council Canada-Industrial Research Assistance Program; New York State Water Research Institute; New York's Great Lakes Basin Small Grants Program (New York Sea Grant); Beacon Institute for Rivers and Estuaries (Clarkson University); National Science Foundation Research Experience for Undergraduate …	Ontario Ministry of the Environment and Climate Change; Five B Family Foundation; National Research Council Canada-Industrial Research Assistance Program; New York State Water Research Institute; New York's Great Lakes Basin Small Grants Program (New York Sea Grant); Beacon Institute for Rivers and Estuaries (Clarkson University); National Science Foundation Research Experience for Undergraduate …	This study was supported by funds from the Ontario Ministry of the Environment and Climate Change, the Five B Family Foundation, and the National Research Council Canada-Industrial Research Assistance Program for a research fellowship for Dr. El-Amine Mimouni. Funding was also provided by the New York State Water Research Institute, New York's Great Lakes Basin Small Grants Program (New York Sea …		83	3	3	0	6	WILEY	HOBOKEN	111 RIVER ST, HOBOKEN 07030-5774, NJ USA	2150-8925			ECOSPHERE	Ecosphere	FEB	2020	11	2
J	Huang, ZL; Chen, SX; Wang, YL; Li, T				Huang, Zonglin; Chen, Shixing; Wang, Yuelin; Li, Tie			Gold nanoparticle modified silicon nanowire array based sensor for low-cost, high sensitivity and selectivity detection of mercury ions	MATERIALS RESEARCH EXPRESS			English	Article						gold nanoparticles; silicon nanowire; mercury detection; sensor	SOLID-PHASE EXTRACTION; HEAVY-METAL IONS; ATOMIC-ABSORPTION; TRACE LEAD; PRECONCENTRATION; SAMPLES; HG2+; SYSTEM; HONEY	Heavy metals are the main factor of water pollution which seriously threaten residents and aquatic life. Here, we demonstrated a mercury ion (Hg2+) sensing device based on gold nanoparticles modified silicon nanowire array for highly sensitive, selective and stable detection of mercury ion. Decorated with gold nanoparticles to increase the number of the thiol groups serving as Hg2+ sensitive prob…	[Huang, Zonglin; Chen, Shixing; Wang, Yuelin; Li, Tie] Chinese Acad Sci, Sci & Technol Microsyst Lab, Shanghai Inst Microsyst & Informat Technol, Shanghai, Peoples R China; [Huang, Zonglin] Univ Chinese Acad Sci, Beijing, Peoples R China	Chinese Academy of Sciences; Shanghai Institute of Microsystem & Information Technology, CAS; Chinese Academy of Sciences; University of Chinese Academy of Sciences, CAS	Chen, SX; Li, T (corresponding author), Chinese Acad Sci, Sci & Technol Microsyst Lab, Shanghai Inst Microsyst & Informat Technol, Shanghai, Peoples R China.	sxchen@mail.sim.ac.cn; tli@mail.sim.ac.cn	chen, shiixng/S-3929-2017; wang, yue/ISA-4119-2023; Wang, Xuezhen/IUN-6267-2023	Li, Tie/0000-0001-9907-0188	National Key Research and Development Program of China [2017YFB0405403, 2018YFA0208500, 2017YFA0207103]	National Key Research and Development Program of China	National Key Research and Development Program of China (No. 2017YFB0405403, 2018YFA0208500, 2017YFA0207103).		41	5	5	1	34	IOP PUBLISHING LTD	BRISTOL	TEMPLE CIRCUS, TEMPLE WAY, BRISTOL BS1 6BE, ENGLAND		2053-1591		MATER RES EXPRESS	Mater. Res. Express	MAR	2020	7	3
J	Wang, ZJ; Samanipour, R; Kim, K				Wang, Zongjie; Samanipour, Roya; Kim, Keekyoung			The cleanroom-free rapid fabrication of a liquid conductivity sensor for surface water quality monitoring	MICROSYSTEM TECHNOLOGIES-MICRO-AND NANOSYSTEMS-INFORMATION STORAGE AND PROCESSING SYSTEMS			English	Article								Conductivity is an important issue of water quality detection. Although there are a number of microfluidic liquid conductivity sensors, most of them were difficult to fabricate and required cleanroom facilities, which significantly increased the cost of sensors. Here, we presented a novel liquid conductivity sensor that was built on interdigitated copper electrodes. Microscale sensor electrodes c…	[Wang, Zongjie; Samanipour, Roya; Kim, Keekyoung] Univ British Columbia, Sch Engn, Kelowna, BC V1V 1V7, Canada	University of British Columbia	Kim, K (corresponding author), Univ British Columbia, Sch Engn, Kelowna, BC V1V 1V7, Canada.	keekyoung.kim@ubc.ca	Wang, Zongjie/AAL-9560-2021; Kim, Keekyoung/Z-1180-2019	Wang, Zongjie/0000-0001-9900-7197;					14	4	4	1	11	SPRINGER HEIDELBERG	HEIDELBERG	TIERGARTENSTRASSE 17, D-69121 HEIDELBERG, GERMANY	0946-7076	1432-1858		MICROSYST TECHNOL	Microsyst. Technol.	SEP	2016	22	9
J	Obrovski, B; Bajic, J; Mihajlovic, I; Miloradov, MV; Batinic, B; Zivanov, M				Obrovski, B.; Bajic, J.; Mihajlovic, I.; Miloradov, M. Vojinovic; Batinic, B.; Zivanov, M.			Colorimetric fiber optic probe for measurement of chemical parameters in surface water	SENSORS AND ACTUATORS B-CHEMICAL			English	Article						Sensor; Color; HSV; Chemical parameters; Monitoring	SENSOR; NITRITE; NITRATE	In this paper a novel fiber optic chemical sensor is proposed with possibility of measuring several chemical parameters using simple structured and low-cost colorimetric probe with high precision. Proposed sensor is based on user oriented and intuitive HSV color model. Concentrations of the orthophosphate, nitrite, sulfate, hexavalent chromium (Cr (VI)) and total chlorine obtained with laboratory…	[Obrovski, B.; Mihajlovic, I.; Miloradov, M. Vojinovic] Univ Novi Sad, Fac Tech Sci, Dept Environm Engn & Occupat Safety & Hlth, Novi Sad 21000, Serbia; [Bajic, J.; Batinic, B.; Zivanov, M.] Univ Novi Sad, Fac Tech Sci, Dept Power Elect & Telecommun Engn, Novi Sad 21000, Serbia	University of Novi Sad; University of Novi Sad	Obrovski, B (corresponding author), Univ Novi Sad, Fac Tech Sci, Dept Environm Engn & Occupat Safety & Hlth, Novi Sad 21000, Serbia.	borisobrovski@uns.ac.rs	Bajić, Jovan/AAD-6174-2022; Batinic, Bojan/AAF-3238-2020; Mihajlovic, Ivana/AAM-3147-2021; Mihajlovic, Ivana/AFR-8591-2022	Bajic, Jovan/0000-0002-8823-5423; Mihajlovic, Ivana/0000-0002-3908-8690	Ministry of Education, Science and Technological Development of Republic of Serbia [III43008]	Ministry of Education, Science and Technological Development of Republic of Serbia	The authors acknowledge for the funding provided by the Ministry of Education, Science and Technological Development of Republic of Serbia under project Development of methods, sensors and systems for monitoring quality of water, air and soil, number III43008.		26	10	10	0	46	ELSEVIER SCIENCE SA	LAUSANNE	PO BOX 564, 1001 LAUSANNE, SWITZERLAND		0925-4005		SENSOR ACTUAT B-CHEM	Sens. Actuator B-Chem.	2023-06-02	2016	228
J	Chopade, S; Gupta, HP; Mishra, R; Oswal, A; Kumari, P; Dutta, T				Chopade, Swati; Gupta, Hari Prabhat; Mishra, Rahul; Oswal, Aman; Kumari, Preti; Dutta, Tanima			A Sensors-Based River Water Quality Assessment System Using Deep Neural Network	IEEE INTERNET OF THINGS JOURNAL			English	Article						Deep neural network (DNN); sensors; water quality	INDEX	With the availability of low-cost and low-power sensors, it becomes easier to assess river water quality. The existing work on water quality assessment require a large amount of correctly annotated data for training. However, in the real-world scenario, obtaining such annotated data is costly and time consuming. In this work, we propose a sensor-based river water quality assessment system using t…	[Chopade, Swati; Gupta, Hari Prabhat; Mishra, Rahul; Kumari, Preti; Dutta, Tanima] Indian Inst Technol BHU Varanasi, Dept Comp Sci & Engn, Varanasi 221005, Uttar Pradesh, India; [Oswal, Aman] Indian Inst Technol BHU Varanasi, Dept Mech Engn, Varanasi 221005, Uttar Pradesh, India	Indian Institute of Technology System (IIT System); Indian Institute of Technology BHU Varanasi (IIT BHU Varanasi); Indian Institute of Technology System (IIT System); Indian Institute of Technology BHU Varanasi (IIT BHU Varanasi)	Mishra, R (corresponding author), Indian Inst Technol BHU Varanasi, Dept Comp Sci & Engn, Varanasi 221005, Uttar Pradesh, India.	swatischopade.rs.csel8@iitbhu.ac.in; hariprabhat.cse@iitbhu.ac.in; rahulmishra.rs.cse17@iitbhu.ac.in; aman.oswal.mec@iitbhu.ac.in; pretikri.rs.cse17@iitbhu.ac.in; tanima.cse@iitbhu.ac.in	Mishra, Rahul/AAW-9010-2021; GUPTA, HARI PRABHAT/AAC-1727-2021; Dutta, Tanima/N-7222-2015	Mishra, Rahul/0000-0002-0976-6737; GUPTA, HARI PRABHAT/0000-0003-3207-1340; Dutta, Tanima/0000-0002-2801-0687; Kumari, Preti/0000-0002-5907-7665	Tata Centre for Development at UChicago	Tata Centre for Development at UChicago	The authors would like to thank Professor Supratik Guha for giving his valuable suggestions. This study is sponsored by the Tata Centre for Development at UChicago.		21	5	5	7	11	IEEE-INST ELECTRICAL ELECTRONICS ENGINEERS INC	PISCATAWAY	445 HOES LANE, PISCATAWAY, NJ 08855-4141 USA	2327-4662			IEEE INTERNET THINGS	IEEE Internet Things J.	2023-08-15	2022	9	16
J	Lauer, JW; Klinger, P; O'Shea, S; Lee, SY				Lauer, J. Wesley; Klinger, Piper; O'Shea, Scott; Lee, Se-Yeun			Development and validation of an open-source four-pole electrical conductivity, temperature, depth sensor for in situ water quality monitoring in an estuary	ENVIRONMENTAL MONITORING AND ASSESSMENT			English	Article						Low-cost sensor; Electrical conductivity; CTD; MicroPython; Estuarine circulation		Most recent implementations of low-cost electrical conductivity (EC) sensors intended for water quality measurements are based on simple two-pole designs. However, in marine settings, EC often exceeds the range where two-pole sensors provide reliable results. We have developed a simple four-pole EC sensor that relies exclusively on analog-to-digital measurements made using readily available circu…	[Lauer, J. Wesley] Seattle Univ, Dept Civil & Environm Engn, 901 12th Ave, Seattle, WA 98122 USA; [Klinger, Piper; Lee, Se-Yeun] Seattle Univ, Dept Civil & Environm Engn, Seattle, WA 98122 USA; [O'Shea, Scott] Seattle Univ, Dept Elect Engn, Seattle, WA 98122 USA; [Klinger, Piper] US Army Corps Engineers, Seattle, WA 98134 USA; [O'Shea, Scott] Assoc Energy Affordabil, Emeryville, CA 94608 USA; [Kl…	Seattle University; Seattle University; Seattle University; United States Department of Defense; United States Army; U.S. Army Corps of Engineers; University of Washington; University of Washington Seattle	Lauer, JW (corresponding author), Seattle Univ, Dept Civil & Environm Engn, 901 12th Ave, Seattle, WA 98122 USA.	lauerj@seattleu.edu			US Forest Service [JV-11261975]; internal Seattle University undergraduate research grant	US Forest Service(United States Department of Agriculture (USDA)United States Forest Service); internal Seattle University undergraduate research grant	This research was supported by US Forest Service Cooperative Agreement JV-11261975. Funding was also provided by an internal Seattle University undergraduate research grant		30	0	0	6	6	SPRINGER	DORDRECHT	VAN GODEWIJCKSTRAAT 30, 3311 GZ DORDRECHT, NETHERLANDS	0167-6369	1573-2959		ENVIRON MONIT ASSESS	Environ. Monit. Assess.	JAN	2023	195	1
J	Christenson, C; Hart, DJ; Cardiff, M; Richmond, S; Fratta, D				Christenson, Catherine; Hart, David J.; Cardiff, Michael; Richmond, Susan; Fratta, Dante			Developing Data-Rich Video of Surface Water-Groundwater Interactions for Public Engagement	GROUNDWATER			English	Article							SPATIAL VARIABILITY; GEOSPATIAL VIDEO	Communication of hydrologic data to the public can be improved by connecting data to the places they represent. In our example of data communication, we coupled hydrologic data with simultaneously collected video as both a scientific and public engagement tool. This note presents a method for collecting spatially and temporally dense datasets of water-quality and geophysical data on small streams…	[Christenson, Catherine; Cardiff, Michael] Univ Wisconsin, Dept Geosci, 1215 W Dayton St, Madison, WI 53706 USA; [Hart, David J.] Wisconsin Geol & Nat Hist Survey, 3817 Mineral Point Rd, Madison, WI 53705 USA; [Richmond, Susan] Arizona Publ Serv, 5801 S Wintersburg Rd, Tonopah, AZ 85354 USA; [Fratta, Dante] Univ Wisconsin, Dept Civil & Environm Engn, Geol Engn, 1415 Engn Dr, Madison, WI 53706 USA	University of Wisconsin System; University of Wisconsin Madison; University of Wisconsin System; University of Wisconsin Madison	Christenson, C (corresponding author), Univ Wisconsin, Dept Geosci, 1215 W Dayton St, Madison, WI 53706 USA.	cchristenso4@wisc.edu	Cardiff, Michael/B-1711-2013	Cardiff, Michael/0000-0002-6720-6084; Christenson, Catherine/0000-0001-5944-2186	Wisconsin Department of Natural Resources; Wisconsin Highway Research Program	Wisconsin Department of Natural Resources; Wisconsin Highway Research Program	Support for this research was provided by Wisconsin Department of Natural Resources. Support for Susan Richmond was provided by the Wisconsin Highway Research Program. The authors thank three anonymous reviewers and the Executive Editor for their feedback, which contributed to the improvement of this manuscript. Jake Westrich (Beloit College), Laura Schachter, Jeremy Patterson, and Collin Roland …		22	0	0	0	3	WILEY	HOBOKEN	111 RIVER ST, HOBOKEN 07030-5774, NJ USA	0017-467X	1745-6584		GROUNDWATER	Groundwater	MAY	2022	60	3
J	Ramadhan, AJ				Ramadhan, Ali J.			SMART WATER-QUALITY MONITORING SYSTEM BASED ON ENABLED REAL-TIME INTERNET OF THINGS	JOURNAL OF ENGINEERING SCIENCE AND TECHNOLOGY			English	Article						Euphrates river; Internet of things; Water pollution; Water quality; Wireless sensor network	NETWORK; DESIGN	The degrading drinking-water quality in Najaf, Iraq, requires immediate attention. This paper present an electronic water-monitoring system capable of facilitating proactive response to curb unsafe water supply in Najaf. The proposed system is intended to replace the conventional method, which is time-consuming and fails at real-time data generation. The proposed system is affordable and based on…	[Ramadhan, Ali J.] Univ AlKafeel, Coll Tech Engn, Dept Comp Tech Engn, Najaf 31001, Iraq		Ramadhan, AJ (corresponding author), Univ AlKafeel, Coll Tech Engn, Dept Comp Tech Engn, Najaf 31001, Iraq.	ali.j.r@alkafeel.edu.iq	Ramadhan, Ali Jasim/C-5854-2016	Ramadhan, Ali Jasim/0000-0003-3253-3525					33	10	11	1	7	TAYLORS UNIV SDN BHD	SELANGOR	1 JALAN SS15-8, SUBANG JAYA, SELANGOR, 47500, MALAYSIA		1823-4690		J ENG SCI TECHNOL	J. Eng. Sci. Technol.	DEC	2020	15	6
J	Demetillo, AT; Taboada, EB				Demetillo, Alexander T.; Taboada, Evelyn B.			Real-Time Water Quality Monitoring For Small Aquatic Area Using Unmanned Surface Vehicle	ENGINEERING TECHNOLOGY & APPLIED SCIENCE RESEARCH			English	Article						unmanned surface vehicle; water quality monitoring; wireless transmission	DESIGN; NAVIGATION; ENERGY; SYSTEM; AERIAL	Most developing countries depend on conventional water quality monitoring methods which are usually expensive, complicated, and time-consuming. In recent years, stationary and portable water quality monitoring and a mobile surface vehicle have increased the utilization of on-site water measurements and monitoring. The first has the disadvantage of small coverage area while the second has its cost…	[Demetillo, Alexander T.] Caraga State Univ, Coll Engn & Informat Technol, Butuan City, Philippines; [Taboada, Evelyn B.] Univ San Carlos, Sch Engn, Cebu, Philippines	University of San Carlos	Demetillo, AT (corresponding author), Caraga State Univ, Coll Engn & Informat Technol, Butuan City, Philippines.	atdemetillo@carsu.edu.ph; evelynbtaboada@gmail.com	Demetillo, Alexander T./AAQ-2513-2020		Department of Science and Technology through its Engineering Research and Development for Technology (ERDT) Program	Department of Science and Technology through its Engineering Research and Development for Technology (ERDT) Program	Authors wish to thank the scholarship funding given by the Department of Science and Technology through its Engineering Research and Development for Technology (ERDT) Program and the Caraga State University for allowing the use of its laboratory and equipment.		39	14	14	0	7	EOS ASSOC	GASTOUNI	ARCHAIAS ILIDAS 16, GASTOUNI, 27050, GREECE	2241-4487	1792-8036		ENG TECHNOL APPL SCI	Eng. Technol. Appl. Sci. Res.	APR	2019	9	2
J	Becker, RH; Sayers, M; Dehm, D; Shuchman, R; Quintero, K; Bosse, K; Sawtell, R				Becker, Richard H.; Sayers, Michael; Dehm, Dustin; Shuchman, Robert; Quintero, Kaydian; Bosse, Karl; Sawtell, Reid			Unmanned aerial system based spectroradiometer for monitoring harmful algal blooms: A new paradigm in water quality monitoring	JOURNAL OF GREAT LAKES RESEARCH			English	Article						UAV; Hyperspectral; Water quality; HABs; Lake Erie; Maumee River	SUBMERGED AQUATIC VEGETATION; WESTERN LAKE-ERIE; GREAT-LAKES; CYANOBACTERIAL BLOOMS; UAV; CHLOROPHYLL; IMAGERY; PHOTOGRAMMETRY; REFLECTANCE; MULTISCALE	Water quality issues continue to impact recreational and resource use of waterways in the Great Lakes and across smaller inland water bodies in their watersheds. With the advancements in small unmanned aerial systems (sUAS) and in small sensor production, sUAS offer flexibility to overcome several of the shortcomings of satellite and airborne systems, and complement their measurements in this env…	[Becker, Richard H.; Dehm, Dustin; Quintero, Kaydian] Univ Toledo, Dept Environm Sci, 2801 W Bancroft St, Toledo, OH 43606 USA; [Sayers, Michael; Shuchman, Robert; Bosse, Karl; Sawtell, Reid] MTRI, Ann Arbor, MI 48105 USA; [Quintero, Kaydian] St Marys Univ, San Antonio, TX 78228 USA	University System of Ohio; University of Toledo	Becker, RH (corresponding author), Univ Toledo, Dept Environm Sci, 2801 W Bancroft St, Toledo, OH 43606 USA.	richard.becker@utoledo.edu	Becker, Richard/A-9120-2010	Becker, Richard/0000-0003-2514-2040	NASA Glenn Research Center [NNC15MF73P, NNC15VA51P]; NSF (National Science Foundation) REU (Research Experiences for Undergraduates) Program [DBI-1461124]	NASA Glenn Research Center(National Aeronautics & Space Administration (NASA)); NSF (National Science Foundation) REU (Research Experiences for Undergraduates) Program	This work was supported by the NASA Glenn Research Center with funding under contract #NNC15MF73P to The University of Toledo and contract #NNC15VA51P to Michigan Tech Research Institute. Additional support was provided by the NSF (National Science Foundation) REU (Research Experiences for Undergraduates) Program, DBI-1461124 Using the Lake Erie Sensor Network to Study Land-Lake Ecological Linkag…		48	37	37	2	45	ELSEVIER SCI LTD	OXFORD	THE BOULEVARD, LANGFORD LANE, KIDLINGTON, OXFORD OX5 1GB, OXON, ENGLAND	0380-1330			J GREAT LAKES RES	J. Gt. Lakes Res.	JUN	2019	45	3
J	Silva, GME; Campos, DF; Brasil, JAT; Tremblay, M; Mendiondo, EM; Ghiglieno, F				Marinho e Silva, Gabriel; Campos, Daiane Ferreira; Teixeira Brasil, Jose Artur; Tremblay, Marcel; Mendiondo, Eduardo Mario; Ghiglieno, Filippo			Advances in Technological Research for Online and In Situ Water Quality Monitoring-A Review	SUSTAINABILITY			English	Review						water quality; in situ; sensors; green technology; water monitoring	HEAVY-METAL IONS; DRINKING-WATER; RIVER WATER; WASTE-WATER; PORTABLE SENSOR; OPTICAL SENSOR; LAKE WATER; SYSTEM; SMARTPHONE; NITRATE	Monitoring water quality is an essential tool for the control of pollutants and pathogens that can cause damage to the environment and human health. However, water quality analysis is usually performed in laboratory environments, often with the use of high-cost equipment and qualified professionals. With the progress of nanotechnology and the advance in engineering materials, several studies have…	[Marinho e Silva, Gabriel; Campos, Daiane Ferreira; Mendiondo, Eduardo Mario] Univ Sao Paulo, Sao Carlos Sch Engn, Dept Hydraul Engn & Sanitat, BR-13566590 Sao Carlos, Brazil; [Teixeira Brasil, Jose Artur] Univ Texas San Antonio, Coll Engn & Integrated Design CEID, San Antonio, TX 78249 USA; [Tremblay, Marcel] Commonwealth Massachusetts, Dept Correct, Milford, MA 01757 USA; [Ghiglieno, Filippo] U…	Universidade de Sao Paulo; University of Texas System; University of Texas at San Antonio (UTSA); Universidade Federal de Sao Carlos	Silva, GME (corresponding author), Univ Sao Paulo, Sao Carlos Sch Engn, Dept Hydraul Engn & Sanitat, BR-13566590 Sao Carlos, Brazil.;Ghiglieno, F (corresponding author), Univ Fed Sao Carlos, Dept Phys, BR-13565905 Sao Carlos, Brazil.	marinho.gabriel@usp.br; daianecampos.eng@gmail.com; jose.brasil@my.utsa.edu; martremcheerful@yahoo.com; emm@sc.usp.br; filippo.ghiglieno@df.ufscar.br	Ghiglieno, Filippo/H-2276-2013; Mendiondo, Eduardo Mario/C-7317-2012	Ghiglieno, Filippo/0000-0002-7795-6858; Mendiondo, Eduardo Mario/0000-0003-2319-2773; Artur Teixeira Brasil, Jose/0000-0002-0331-0122; Marinho e Silva, Gabriel/0000-0002-1809-0521	Coordenacao de Aperfeicoamento de Pessoal de Nivel Superior-CAPES; Conselho Nacional de Desenvolvimento Cientifico e Tecnologico-CNPq; Fundacao de Amparo a Pesquisa do Estado de Sao Paulo-FAPESP; Pro-Reitoria de Pesquisa-USP	Coordenacao de Aperfeicoamento de Pessoal de Nivel Superior-CAPES(Coordenacao de Aperfeicoamento de Pessoal de Nivel Superior (CAPES)); Conselho Nacional de Desenvolvimento Cientifico e Tecnologico-CNPq(Conselho Nacional de Desenvolvimento Cientifico e Tecnologico (CNPQ)); Fundacao de Amparo a Pesquisa do Estado de Sao Paulo-FAPESP(Fundacao de Amparo a Pesquisa do Estado de Sao Paulo (FAPESP)); P…	The researchers were supported by the Coordenacao de Aperfeicoamento de Pessoal de Nivel Superior-CAPES, by the Conselho Nacional de Desenvolvimento Cientifico e Tecnologico-CNPq, by the Fundacao de Amparo a Pesquisa do Estado de Sao Paulo-FAPESP, and by the Pro-Reitoria de Pesquisa-USP.		163	9	9	24	54	MDPI	BASEL	ST ALBAN-ANLAGE 66, CH-4052 BASEL, SWITZERLAND		2071-1050		SUSTAINABILITY-BASEL	Sustainability	MAY	2022	14	9
J	Montserrat, A; Gutierrez, O; Poch, M; Corominas, L				Montserrat, A.; Gutierrez, O.; Poch, M.; Corominas, Ll			Field validation of a new low-cost method for determining occurrence and duration of combined sewer overflows	SCIENCE OF THE TOTAL ENVIRONMENT			English	Article						CSO; Monitoring; Sewer system; Temperature; Wastewater; CSS	WASTE-WATER; RIVER; IMPACT; QUALITY; SYSTEMS; EVENT	Combined sewer overflow (CSO) events produced in combined sewer systems (CSS) during wet weather conditions are a threat for the receiving water bodies. The large number of CSO structures normally present in a CSS makes that the monitoring of the complete CSO network in a simultaneous way would drastically increase the investment costs. In this paper, a new methodology is presented aiming to char…	[Montserrat, A.; Gutierrez, O.; Poch, M.; Corominas, Ll] Univ Girona, Catalan Inst Water Res, Girona 17003, Spain; [Poch, M.] Univ Girona, Lab Chem & Environm Engn LEQUIA, Girona 17003, Spain	Institut Catala de Recerca de l'Aigua (ICRA); Universitat de Girona; Universitat de Girona	Corominas, L (corresponding author), Univ Girona, Catalan Inst Water Res, Sci & Technol Pk,H2O Bldg,Emili Grahit 101, Girona 17003, Spain.	amontserrat@icra.cat; ogutierrez@icra.cat; manuel.poch@udg.edu; lcorominas@icra.cat	corominas, lluis/AAH-6588-2021; Corominas, Lluís/I-3484-2012	corominas, lluis/0000-0002-5050-2389; Corominas, Lluís/0000-0002-5050-2389; Poch, Manel/0000-0002-2593-9298; Gutierrez, Oriol/0000-0001-7114-1730	Consorci per la Defensa de la Conca del Riu Besos (CDCRB); Spanish Ministry of Science and Innovation (ENDERUS) [CTM-2009-13018]; Spanish National Project [CTM-2011-27163]; Juan de la Cierva [jci-2009-05604, FPI BES2010-039247]; European Union [FEDER-CTM2009-13018]	Consorci per la Defensa de la Conca del Riu Besos (CDCRB); Spanish Ministry of Science and Innovation (ENDERUS); Spanish National Project(Spanish Government); Juan de la Cierva(Instituto de Salud Carlos IIISpanish Government); European Union(European CommissionSpanish Government)	The authors would like to thank Consorci per la Defensa de la Conca del Riu Besos (CDCRB), the Spanish Ministry of Science and Innovation (ENDERUS) (CTM-2009-13018), Spanish National Project (CTM-2011-27163), Juan de la Cierva (jci-2009-05604, FPI BES2010-039247), and European Union (FEDER-CTM2009-13018). In addition would like to thank to the staff from Drenatges Urbans del Besbs for their const…		37	14	14	0	42	ELSEVIER SCIENCE BV	AMSTERDAM	PO BOX 211, 1000 AE AMSTERDAM, NETHERLANDS	0048-9697	1879-1026		SCI TOTAL ENVIRON	Sci. Total Environ.	2023-10-01	2013	463
J	Cobelo, I; Machado, KB; David, ACM; Carvalho, P; Ferreira, ME; Nabout, JC				Cobelo, I.; Machado, K. B.; David, A. C. M.; Carvalho, P.; Ferreira, M. E.; Nabout, J. C.			Unmanned aerial vehicles and low-cost sensor as tools for monitoring freshwater chlorophyll-a in mesocosms with different trophic state	INTERNATIONAL JOURNAL OF ENVIRONMENTAL SCIENCE AND TECHNOLOGY			English	Article						Eutrophication; Phytoplankton; Vegetation indices; Remote sensing; UAV	UAV; EUTROPHICATION; ECOSYSTEMS; VEGETATION; INDEXES; COASTAL; BLOOMS; COLOR	Eutrophication is one of the leading causes of compromising the quality of freshwater and marine ecosystems, where the concentration of chlorophyll-a is an essential variable to monitoring the water quality. Moreover, monitoring in situ chlorophyll-a require constants samplings, high laboratory, and logistics costs, and sometimes in regions not accessible. Therefore, new technology can be importa…	[Cobelo, I.; Machado, K. B.; David, A. C. M.; Nabout, J. C.] Univ Estadual de Goias UEG, Campus Cent,BR 153, BR-75132903 Anapolis, Go, Brazil; [Carvalho, P.; Ferreira, M. E.] Univ Fed de Goias UFG, Campus Samambaia,Av Esperanca,s n, BR-74690900 Goiania, Go, Brazil		Nabout, JC (corresponding author), Univ Estadual de Goias UEG, Campus Cent,BR 153, BR-75132903 Anapolis, Go, Brazil.	joao.nabout@ueg.br	FERREIRA, MARIA EUGENIA COSTA/HSE-9167-2023; Nabout, Joao/I-2828-2014	FERREIRA, MARIA EUGENIA COSTA/0000-0002-4262-743X; Machado, Karine/0000-0003-2744-7964; Nabout, Joao/0000-0001-9102-3627	FAPEG (Fundacao de Amparo a Pesquisa do Estado de Goias); CNPq (Conselho Nacional de Desenvolvimento Cientifico e Tecnologico); Coordenacao de Aperfeicoamento de Pessoal de Nivel Superior-Brazil (CAPES) [001]; National Institutes for Science and Technology (INCT) in Ecology, Evolution and Biodiversity Conservation [MCTI/CNPq/FAPEG/465610/2014-5]; Brazilian Network on Global Climate Change Researc…	FAPEG (Fundacao de Amparo a Pesquisa do Estado de Goias); CNPq (Conselho Nacional de Desenvolvimento Cientifico e Tecnologico)(Conselho Nacional de Desenvolvimento Cientifico e Tecnologico (CNPQ)); Coordenacao de Aperfeicoamento de Pessoal de Nivel Superior-Brazil (CAPES)(Coordenacao de Aperfeicoamento de Pessoal de Nivel Superior (CAPES)); National Institutes for Science and Technology (INCT) in…	This study was funded by FAPEG (Fundacao de Amparo a Pesquisa do Estado de Goias) and CNPq (Conselho Nacional de Desenvolvimento Cientifico e Tecnologico) for scholarships and productivity grants. This study was financed in part by the Coordenacao de Aperfeicoamento de Pessoal de Nivel Superior-Brazil (CAPES)-Finance Code 001. National Institutes for Science and Technology (INCT) in Ecology, Evol…		61	1	1	2	11	SPRINGER	NEW YORK	ONE NEW YORK PLAZA, SUITE 4600, NEW YORK, NY, UNITED STATES	1735-1472	1735-2630		INT J ENVIRON SCI TE	Int. J. Environ. Sci. Technol.	JUN	2023	20	6
J	Serrano-Finetti, E; Aliau-Bonet, C; Lopez-Lapena, O; Pallas-Areny, R				Serrano-Finetti, Ernesto; Aliau-Bonet, Caries; Lopez-Lapena, Oscar; Pallas-Areny, Ramon			Cost-effective autonomous sensor for the long-term monitoring of water electrical conductivity of crop fields	COMPUTERS AND ELECTRONICS IN AGRICULTURE			English	Article						Water quality; Electrical conductivity; Complex electrical impedance; Autonomous sensor; Crop field		Salinity is a key parameter determining water quality. In agriculture, irrigation water with high salinity levels impacts plant growth and yield negatively hence there is a need to monitor it and irrigate with fresh water whenever salinity surpasses the tolerance threshold of a cultivar. Electrical conductivity (EC) of water is usually measured periodically instead of salinity because of its prac…	[Serrano-Finetti, Ernesto; Aliau-Bonet, Caries; Lopez-Lapena, Oscar; Pallas-Areny, Ramon] Univ Politecn Cataluna, BarcelonaTech, Instrumentat Sensors & Interfaces Grp, C Esteve Terradas,7, Castelldefels 08860, Barcelona, Spain	Universitat Politecnica de Catalunya	Serrano-Finetti, E (corresponding author), Univ Politecn Cataluna, BarcelonaTech, Instrumentat Sensors & Interfaces Grp, C Esteve Terradas,7, Castelldefels 08860, Barcelona, Spain.	ernesto.serrano@upc.edu; oscar.lopez@upc.edu; ramon.pallas@upc.edu	Pallas, Ramon/AAL-1239-2020	Pallas, Ramon/0000-0002-0430-5309; Serrano-Finetti, Ernesto/0000-0002-5628-5426; Lopez, Oscar/0000-0002-6024-0722	European Commission [285861]	European Commission(European CommissionEuropean Commission Joint Research Centre)	This work has been funded by the European Commission grant No. 285861. The authors would like to thank the cooperation of Prof. Dimitris Katsantonis and Dr. Christos Dramalis for the field tests and technical assistance of Mr. Francis Lopez.		15	8	8	2	9	ELSEVIER SCI LTD	OXFORD	THE BOULEVARD, LANGFORD LANE, KIDLINGTON, OXFORD OX5 1GB, OXON, ENGLAND	0168-1699	1872-7107		COMPUT ELECTRON AGR	Comput. Electron. Agric.	OCT	2019	165
J	Balson, T; Ward, AS				Balson, Tyler; Ward, Adam S.			A machine learning approach to water quality forecasts and sensor network expansion: Case study in the Wabash River Basin, United States	HYDROLOGICAL PROCESSES			English	Article						forecast; machine learning; optimization; sensor network design; water quality	CLIMATE-CHANGE; MULTIOBJECTIVE OPTIMIZATION; GENETIC ALGORITHM; IMPACTS; NITRATE; STREAMS; MISCANTHUS; PLACEMENT; EXPORT	Midwestern cities require forecasts of surface nitrate loads to bring additional treatment processes online or activate alternative water supplies. Concurrently, networks of nitrate monitoring stations are being deployed in river basins, co-locating water quality observations with established stream gauges. However, tools to evaluate the future value of expanded networks to improve water quality …	[Balson, Tyler] Indiana Univ, Luddy Sch Informat Comp & Engn, Bloomington, IN 47408 USA; [Ward, Adam S.] Indiana Univ, ONeill Sch Publ & Environm Affairs, Bloomington, IN USA; [Ward, Adam S.] Oregon State Univ, Biol & Ecol Engn, Corvallis, OR 97331 USA	Indiana University System; Indiana University Bloomington; Indiana University System; Indiana University Bloomington; Oregon State University	Balson, T (corresponding author), Indiana Univ, Luddy Sch Informat Comp & Engn, Bloomington, IN 47408 USA.	tbalson@iu.edu	Ward, Adam/H-7668-2012	Ward, Adam/0000-0002-6376-0061; Balson, Tyler/0000-0001-5499-2197	University of Birmingham; National Science Foundation [EAR-1360276, EAR-1652293]; U.S. Department of Energy [DE-SC0019377]	University of Birmingham; National Science Foundation(National Science Foundation (NSF)); U.S. Department of Energy(United States Department of Energy (DOE))	University of Birmingham; National Science Foundation, Grant/Award Numbers: EAR-1360276, EAR-1652293; U.S. Department of Energy, Grant/Award Number: DE-SC0019377		79	0	0	3	7	WILEY	HOBOKEN	111 RIVER ST, HOBOKEN 07030-5774, NJ USA	0885-6087	1099-1085		HYDROL PROCESS	Hydrol. Process.	JUN	2022	36	6
J	Kearns, J; Dickenson, E; Aung, MT; Joseph, SM; Summers, SR; Knappe, D				Kearns, Joshua; Dickenson, Eric; Aung, Myat Thandar; Joseph, Sarangi Madhavi; Summers, Scott R.; Knappe, Detlef			Biochar Water Treatment for Control of Organic Micropollutants with Ultraviolet A Surrogate Monitoring	ENVIRONMENTAL ENGINEERING SCIENCE			English	Article						biochar water treatment; contaminants of emerging concern; engineering for developing communities; hygiene for development; low-cost sensors; sanitation; water	GRANULAR ACTIVATED CARBON; MICRO-POLLUTANT REMOVAL; SCALE GAC ADSORPTION; WASTE-WATER; UV ABSORBENCY; CONTAMINANTS; ATRAZINE; MATTER; SULFAMETHOXAZOLE; BREAKTHROUGH	Biochar adsorbent can be produced in low-resource settings using local materials and simple pyrolysis technology, and it has shown promise for uptake of micropollutants (MPs) such as pesticides, pharmaceuticals, industrial compounds, and chemicals released from consumer goods present in water at ng/L to mu g/L levels. Accordingly, the use of biochar in water treatment applications where granular …	[Kearns, Joshua] Aqueous Solut, 1935 Pike Rd, Moravian Falls, NC 28654 USA; [Dickenson, Eric] Southern Nevada Water Author, Appl Res & Dev Ctr, Las Vegas, NV USA; [Aung, Myat Thandar; Knappe, Detlef] North Carolina State Univ, Civil Construct & Environm Engn, Raleigh, NC USA; [Joseph, Sarangi Madhavi] Open Univ Sri Lanka, Nugegoda, Sri Lanka; [Summers, Scott R.] Univ Colorado, SEEC S295A, ECST 20…	North Carolina State University; Open University Sri Lanka; University of Colorado System; University of Colorado Boulder	Kearns, J (corresponding author), Aqueous Solut, 1935 Pike Rd, Moravian Falls, NC 28654 USA.	joshuakearns@protonmail.com	Joseph, Sarangi/HHC-7492-2022	Joseph, Sarangi/0000-0001-7302-0297	US EPA Science to Achieve Results (STAR) graduate research fellowship Southern Nevada Water Authority; North Carolina State University; University of Sri Jayewardenepura (Sri Lanka) Partnership for Excellence in Global WaSH (Water-Sanitation-Hygiene) Research Aqueous Solutions	US EPA Science to Achieve Results (STAR) graduate research fellowship Southern Nevada Water Authority; North Carolina State University; University of Sri Jayewardenepura (Sri Lanka) Partnership for Excellence in Global WaSH (Water-Sanitation-Hygiene) Research Aqueous Solutions	US EPA Science to Achieve Results (STAR) graduate research fellowship Southern Nevada Water Authority, North Carolina State University and University of Sri Jayewardenepura (Sri Lanka) Partnership for Excellence in Global WaSH (Water-Sanitation-Hygiene) Research Aqueous Solutions.		38	13	13	2	30	MARY ANN LIEBERT, INC	NEW ROCHELLE	140 HUGUENOT STREET, 3RD FL, NEW ROCHELLE, NY 10801 USA	1092-8758	1557-9018		ENVIRON ENG SCI	Environ. Eng. Sci.	2023-05-01	2021	38	5
J	Demetillo, AT; Japitana, MV; Taboada, EB				Demetillo, Alexander T.; Japitana, Michelle, V; Taboada, Evelyn B.			A system for monitoring water quality in a large aquatic area using wireless sensor network technology	SUSTAINABLE ENVIRONMENT RESEARCH			English	Article						Dissolved oxygen; Environmental management; pH; Water quality monitoring; Wireless sensor network	RIVER	In this paper, a low cost, real-time water quality monitoring system which can be applied in remote rivers, lakes, coastal areas and other water bodies is presented. The main hardware of the system consists of off-the-shelf electrochemical sensors, a microcontroller, a wireless communication system and the customized buoy. It detects water temperature, dissolved oxygen and pH in a pre-programmed …	[Demetillo, Alexander T.; Japitana, Michelle, V; Taboada, Evelyn B.] Univ San Carlos, Sch Engn, Cebu 6000, Philippines; [Demetillo, Alexander T.; Japitana, Michelle, V] Caraga State Univ, Coll Engn & Informat Technol, Butuan City 8600, Philippines	University of San Carlos	Demetillo, AT (corresponding author), Univ San Carlos, Sch Engn, Cebu 6000, Philippines.;Demetillo, AT (corresponding author), Caraga State Univ, Coll Engn & Informat Technol, Butuan City 8600, Philippines.	atdemetillo@gmail.com	Demetillo, Alexander T./AAQ-2513-2020		Department of Science and Technology through its Engineering Research and Development for Technology (ERDT) Program	Department of Science and Technology through its Engineering Research and Development for Technology (ERDT) Program	Our thanks to the scholarship funding given by the Department of Science and Technology through its Engineering Research and Development for Technology (ERDT) Program. We are also grateful for the provision of laboratory space and equipment by the Center for Robotics, Automation and Fabrication Technologies (CRAFT) of Caraga State University.		34	40	40	1	12	BMC	LONDON	CAMPUS, 4 CRINAN ST, LONDON N1 9XW, ENGLAND	2468-2039			SUSTAIN ENVIRON RES	Sustain. Environ. Res.	2023-04-23	2019	29
J	Kavai, MS; de Lima, LF; de Araujo, WR				Kavai, Mathias Stahl; de Lima, Lucas Felipe; de Araujo, William Reis			A disposable and low-cost laser-scribed graphene electrochemical sensor for simultaneous detection of hydroquinone, paracetamol and methylparaben	MATERIALS LETTERS			English	Article						Laser fabrication; Electrochemical sensor; Simultaneous detection; Disposable device	FABRICATION	A novel and inexpensive laser-scribed graphene (LSG) sensor using polyetherimide (PEI) substrate was fabricated using CO2 laser. The material was characterized by scanning electron microscopy (SEM), Raman spectroscopy, and electrochemical techniques, demonstrating a high porous carbonaceous material, which resulted in an electroactive area with 2.4-fold enhancement compared to geometric area and …	[Kavai, Mathias Stahl; de Lima, Lucas Felipe; de Araujo, William Reis] Univ Estadual Campinas, Portable Chem Sensors Lab, Dept Analyt Chem, Inst Chem, BR-13083970 Campinas, SP, Brazil	Universidade Estadual de Campinas	de Araujo, WR (corresponding author), Univ Estadual Campinas, Portable Chem Sensors Lab, Dept Analyt Chem, Inst Chem, BR-13083970 Campinas, SP, Brazil.	wra@unicamp.br			Sao Paulo Research Foundation (FAPESP) [2018/08782-1]; CNPq [134391/2021-2, 438828/2018-6]; CAPES [88887.479793/2020-00]	Sao Paulo Research Foundation (FAPESP)(Fundacao de Amparo a Pesquisa do Estado de Sao Paulo (FAPESP)); CNPq(Conselho Nacional de Desenvolvimento Cientifico e Tecnologico (CNPQ)); CAPES(Coordenacao de Aperfeicoamento de Pessoal de Nivel Superior (CAPES))	This work was supported by the Sao Paulo Research Foundation (FAPESP) [Grant: 2018/08782-1], CNPq (Grant: 134391/2021-2 and 438828/2018-6), and CAPES (Grant: 88887.479793/2020-00).		11	5	5	24	98	ELSEVIER	AMSTERDAM	RADARWEG 29, 1043 NX AMSTERDAM, NETHERLANDS	0167-577X	1873-4979		MATER LETT	Mater. Lett.	2023-01-01	2023	330
J	Wang, LH; Yue, XJ; Wang, HH; Ling, KJ; Liu, YX; Wang, J; Hong, JB; Pen, W; Song, HB				Wang, Linhui; Yue, Xuejun; Wang, Huihui; Ling, Kangjie; Liu, Yongxin; Wang, Jian; Hong, Jinbao; Pen, Wen; Song, Houbing			Dynamic Inversion of Inland Aquaculture Water Quality Based on UAVs-WSN Spectral Analysis	REMOTE SENSING			English	Article						UAVs; WSN; spectral; remote sensing; water quality; dynamic inversion; deep learning	CHLOROPHYLL-A CONCENTRATIONS; AERIAL VEHICLE UAV; REMOTE; REFLECTANCE; LEAF; MODEL; LAKE; SIMULATION; RETRIEVAL; IMPACTS	The inland aquaculture environment is an artificial ecosystem, where the water quality is a key factor which is closely related to the economic benefits of inland aquaculture and the quality of aquatic products. Compared with marine aquaculture, inland aquaculture is normally smaller and susceptible to pollution, with poor self-purification capacity. Considering its low cost and large-scale monit…	[Wang, Linhui; Yue, Xuejun] Guangdong Lab Lingnan Modern Agr, Guangzhou 510642, Peoples R China; [Wang, Linhui; Yue, Xuejun; Ling, Kangjie; Hong, Jinbao; Pen, Wen] South China Agr Univ, Coll Elect Engn, Guangzhou 510642, Peoples R China; [Wang, Huihui] Jacksonville Univ, Dept Engn, Jacksonville, FL 32211 USA; [Liu, Yongxin; Wang, Jian; Song, Houbing] Embry Riddle Aeronaut Univ, Dept Elect Comp So…	Guangdong Laboratory for Lingnan Modern Agriculture; South China Agricultural University; Jacksonville University; Embry-Riddle Aeronautical University	Yue, XJ (corresponding author), Guangdong Lab Lingnan Modern Agr, Guangzhou 510642, Peoples R China.;Yue, XJ (corresponding author), South China Agr Univ, Coll Elect Engn, Guangzhou 510642, Peoples R China.	Jetwlh@stu.scau.edu.cn; yuexuejun@scau.edu.cn; hwang1@ju.edu; lyht@stu.scau.edu.cn; LIUY11@my.erau.edu; wangj14@my.erau.edu; jimbo@stu.scau.edu.cn; pengwen103@stu.scau.edu.cn; h.song@ieee.org	Liu, Yong/GWQ-6163-2022; Wang, Jian/J-7948-2019; Song, Houbing/E-3628-2010; Wang, Huihui/ABB-6935-2021	Wang, Jian/0000-0001-6043-6971; Song, Houbing/0000-0003-2631-9223; Wang, Huihui/0000-0002-4098-5313; Liu, Yongxin/0000-0003-4527-8623	SCIENCE AND TECHNOLOGY PLANNING PROJECT OF GUANGDONG [201803020022]; WATER CONSERVANCY SCIENCE AND TECHNOLOGY INNOVATION PEOJECT OF GUANGDONG [2016-18]	SCIENCE AND TECHNOLOGY PLANNING PROJECT OF GUANGDONG; WATER CONSERVANCY SCIENCE AND TECHNOLOGY INNOVATION PEOJECT OF GUANGDONG	This research was funded by the SCIENCE AND TECHNOLOGY PLANNING PROJECT OF GUANGDONG, grant number 201803020022. This research was also partly supported by the WATER CONSERVANCY SCIENCE AND TECHNOLOGY INNOVATION PEOJECT OF GUANGDONG, grant number 2016-18.		52	14	16	7	72	MDPI	BASEL	ST ALBAN-ANLAGE 66, CH-4052 BASEL, SWITZERLAND		2072-4292		REMOTE SENS-BASEL	Remote Sens.	FEB	2020	12	3
S	Pant, M; Pancholi, D; Pande, V; Dandapat, A		Pooja, D; Kumar, P; Singh, P; Patil, S		Pant, Megha; Pancholi, Deepika; Pande, Veena; Dandapat, Anirban			Immunochromatographic Strip Based Sensor for the Detection of Water Pollutants	SENSORS IN WATER POLLUTANTS MONITORING: ROLE OF MATERIAL	Advanced Functional Materials and Sensors		English	Article; Book Chapter						Immunochromatography; Portable sensor; Water pollutants	LATERAL-FLOW ASSAY; NUCLEIC-ACID APTAMERS; RAPID DETECTION; SENSITIVE DETECTION; GOLD NANOPARTICLES; AQUEOUS-SOLUTION; VISUAL DETECTION; DIPSTICK ASSAY; IN-VITRO; IMMUNOASSAY	The ever-increasing demand for the clean and fresh water with the rapid population growth has been emerged as one of the major issues now. The widespread problem of water pollution is not just jeopardizing our health but is equally damaging to the aquatic environment. There are several techniques available for detection of various kinds of water pollutants but most of them either utilize sophisti…	[Pant, Megha; Pancholi, Deepika; Pande, Veena; Dandapat, Anirban] Kumaun Univ, Dept Biotechnol, Bhimtal Campus, Bhimtal 263136, Uttarakhand, India; [Dandapat, Anirban] Kumaun Univ, Dept Chem, DSB Campus, Naini Tal 263002, Uttarakhand, India	Kumaun University; Kumaun University	Dandapat, A (corresponding author), Kumaun Univ, Dept Biotechnol, Bhimtal Campus, Bhimtal 263136, Uttarakhand, India.	dranirbandandapat@kunainital.ac.in			DST [DST/INSPIRE/04/2016/000293]	DST(Department of Science & Technology (India))	DST, Govt. of India is acknowledged for financial assistance through INSPIRE Faculty Award (DST/INSPIRE/04/2016/000293).		94	1	1	1	5	SPRINGER-VERLAG SINGAPORE PTE LTD	SINGAPORE	152 BEACH ROAD, #21-01/04 GATEWAY EAST, SINGAPORE, 189721, SINGAPORE	2662-558X	2662-5598	978-981-15-0671-0; 978-981-15-0670-3	ADV FUNCT MAT SENS			2020
J	Baghel, LK; Gautam, S; Malav, VK; Kumar, S				Baghel, Lalit Kumar; Gautam, Sukriti; Malav, Vikas Kumar; Kumar, Suman			TEMPSENSE: LoRa Enabled Integrated Sensing and Localization Solution for Water Quality Monitoring	IEEE TRANSACTIONS ON INSTRUMENTATION AND MEASUREMENT			English	Article						Water quality; Location awareness; Monitoring; Sensors; Logic gates; Hardware; Real-time systems; Hardware design; Internet of Things (IoT); localization; long range (LoRa); water quality monitoring	INDOOR	With the continuous increase in water pollution, water quality monitoring has become quite essential. Though existing solutions facilitate various features [e.g., the potential of hydrogen (pH), dissolved oxygen (DO), temperature, and electrical conductivity (EC)], they possess numerous limitations: 1) most of the existing systems rely on regional wireless systems, e.g., global system for mobile …	[Baghel, Lalit Kumar; Gautam, Sukriti; Malav, Vikas Kumar; Kumar, Suman] IIT Ropar, Dept Elect Engn, Ropar 140001, Punjab, India	Indian Institute of Technology System (IIT System); Indian Institute of Technology (IIT) - Ropar	Baghel, LK (corresponding author), IIT Ropar, Dept Elect Engn, Ropar 140001, Punjab, India.	lalit.19eez0026@iitrpr.ac.in; sukriti.19eez0015@iitrpr.ac.in; vikas.20eez0023@iitrpr.ac.in; suman@iitrpr.ac.in	Baghel, Lalit Kumar/GZK-8569-2022; Malav, Vikas Kumar/HPC-0943-2023	, Vikas Kumar Malav/0000-0003-3696-7232; Baghel, Lalit Kumar/0000-0002-2612-0030	Department of Science and Technology, Government of India	Department of Science and Technology, Government of India(Department of Science & Technology (India))	This work was supported by the Department of Science and Technology, Government of India, for the Technology Innovation Hub at the Indian Institute of Technology Ropar in the framework of National Mission on Interdisciplinary CyberPhysical Systems (NM-ICPS). The Associate Editor coordinating the review process was Dr. Guanfeng Du.		28	5	5	2	13	IEEE-INST ELECTRICAL ELECTRONICS ENGINEERS INC	PISCATAWAY	445 HOES LANE, PISCATAWAY, NJ 08855-4141 USA	0018-9456	1557-9662		IEEE T INSTRUM MEAS	IEEE Trans. Instrum. Meas.		2022	71
J	Lin, J; Yin, JW; Gao, WL; Jin, QH				Lin, Jian; Yin, Jiawen; Gao, Wanlei; Jin, Qinghui			Electrochemical Determination of Chemical Oxygen Demand (COD) in Surface Water Using a Microfabricated Boron-Doped Diamond (BDD) Electrode by Chronoamperometry	ANALYTICAL LETTERS			English	Article						Batch microfabrication; boron-doped diamond (BDD) electrode; chemical oxygen demand (COD); chronoamperometry; electrochemical sensor	SENSOR; BIOSENSORS; EVOLUTION; CARBON; RING; CELL	Chemical oxygen demand (COD) is an important indicator of the degree of organic pollution in water. However, the development of integrated and batch COD electrochemical sensors has always been challenging. In this study, a three-electrode integrated electrochemical sensor for the measurement of COD in surface water was evaluated. Using microfabrication with a microelectromechanical system (MEMS),…	[Lin, Jian; Yin, Jiawen; Gao, Wanlei; Jin, Qinghui] Ningbo Univ, Fac Elect Engn & Comp Sci, Ningbo, Peoples R China; [Gao, Wanlei; Jin, Qinghui] Chinese Acad Sci, Shanghai Inst Microsyst & Informat Technol, State Key Lab Transducer Technol, Shanghai, Peoples R China; [Jin, Qinghui] Ningbo Univ, Fac Elect Engn & Comp Sci, Ningbo 315211, Peoples R China	Ningbo University; Chinese Academy of Sciences; Shanghai Institute of Microsystem & Information Technology, CAS; Ningbo University	Jin, QH (corresponding author), Ningbo Univ, Fac Elect Engn & Comp Sci, Ningbo 315211, Peoples R China.	jinqinghui@nbu.edu.cn	Jin, Qinghui/S-8451-2016		National Science Foundation of China [62271272]; Ningbo Key Research and Development Program [2022Z092]; Special Research Funding from the Marine Biotechnology and Marine Engineering Discipline Group; K. C. Wong Magna Fund in Ningbo University	National Science Foundation of China(National Natural Science Foundation of China (NSFC)); Ningbo Key Research and Development Program; Special Research Funding from the Marine Biotechnology and Marine Engineering Discipline Group; K. C. Wong Magna Fund in Ningbo University	This work was supported in part by the National Science Foundation of China under Grant 62271272, in part by the Ningbo Key Research and Development Program under Grant 2022Z092. Additionally, this study was also sponsored by the Special Research Funding from the Marine Biotechnology and Marine Engineering Discipline Group and by the K. C. Wong Magna Fund in Ningbo University.		27	0	0	11	11	TAYLOR & FRANCIS INC	PHILADELPHIA	530 WALNUT STREET, STE 850, PHILADELPHIA, PA 19106 USA	0003-2719	1532-236X		ANAL LETT	Anal. Lett.	2023-09-22	2023	56	14
J	Wiora, J; Kozyra, A; Wiora, A				Wiora, J.; Kozyra, A.; Wiora, A.			Towards automation of measurement processes of surface water parameters by a remote-controlled catamaran	BULLETIN OF THE POLISH ACADEMY OF SCIENCES-TECHNICAL SCIENCES			English	Article						measurement automation; remote-controlled boat; environmental water analysis; potentiometry	ION-SELECTIVE ELECTRODES; PROGRAMMING-LANGUAGES; SYSTEM; SEDIMENTS; QUALITY; SENSOR; IMPROVEMENT; SPECIATION; RESERVOIR; METALS	This paper describes a way of determining selected water parameters using a prototype of a remote-controlled catamaran. The remote controlling allows to steer the boat and to manage the measurement process from the shore. It is possible to monitor the water parameters online as well as to store them and analyze them afterwards. The measured parameters are determined mainly using potentiometric me…	[Wiora, J.; Kozyra, A.; Wiora, A.] Silesian Tech Univ, Inst Automat Control, 16 Akademicka St, PL-44100 Gliwice, Poland	Silesian University of Technology	Wiora, J (corresponding author), Silesian Tech Univ, Inst Automat Control, 16 Akademicka St, PL-44100 Gliwice, Poland.	jozef@wiora.pl	Wiora, Józef/I-8784-2012	Wiora, Józef/0000-0002-8450-8623; Kozyra, Andrzej/0000-0003-2645-3537	Polish Ministry of Science and Higher Education [Bk/213/RAu1/2016]	Polish Ministry of Science and Higher Education(Ministry of Science and Higher Education, Poland)	r The authors would like to thank Andrian Hamczyk for help in realizing the project and the Polish Ministry of Science and Higher Education (Bk/213/RAu1/2016) for financial support.		45	9	9	0	5	POLSKA AKAD NAUK, POLISH ACAD SCI, DIV IV TECHNICAL SCIENCES PAS	WARSZAWA	PL DEFILAD 1, WARSZAWA, 00-901, POLAND	0239-7528	2300-1917		B POL ACAD SCI-TECH	Bull. Pol. Acad. Sci.-Tech. Sci.	JUN	2017	65	3
J	Saylam, K; Hupp, JR; Andrews, JR; Averett, AR; Knudby, AJ				Saylam, Kutalmis; Hupp, John R.; Andrews, John R.; Averett, Aaron R.; Knudby, Anders J.			Quantifying Airborne Lidar Bathymetry Quality-Control Measures: A Case Study in Frio River, Texas	SENSORS			English	Article						Lidar bathymetry; environmental conditions; uncertainties; quality management	ACCURACY; ATTENUATION; TURBIDITY	Airborne Lidar Bathymetry (ALB) is an advanced and effective technology for mapping water bodies and measuring water depth in relatively shallow inland and coastal zones. The concept of using light beams to detect and traverse water bodies has been around since the 1960s; however, its popularity has increased significantly in recent years with the advent of relatively affordable hardware, supplem…	[Saylam, Kutalmis; Hupp, John R.; Andrews, John R.; Averett, Aaron R.] Univ Texas Austin, John A & Katherine G Jackson Sch Geosci, Near Surface Observ, Bur Econ Geol, Austin, TX 78758 USA; [Saylam, Kutalmis; Knudby, Anders J.] Univ Ottawa, Dept Geog Environm & Geomat, Shallow Water Earth Observat Lab, Ottawa, ON K1N 6N5, Canada	University of Texas System; University of Texas Austin; University of Ottawa	Saylam, K (corresponding author), Univ Texas Austin, John A & Katherine G Jackson Sch Geosci, Near Surface Observ, Bur Econ Geol, Austin, TX 78758 USA.;Saylam, K (corresponding author), Univ Ottawa, Dept Geog Environm & Geomat, Shallow Water Earth Observat Lab, Ottawa, ON K1N 6N5, Canada.	kutalmis.saylam@beg.utexas.edu; John.Hupp@beg.utexas.edu; John.Andrews@beg.utexas.edu; Aaron.Averett@beg.utexas.edu; aknudby@uottawa.ca	Saylam, Kutalmis/GZL-2354-2022; Andrews, John/AAA-2616-2022	Saylam, Kutalmis/0000-0002-2216-5565; Knudby, Anders/0000-0001-8970-8504	Texas Water Development Board (TWDB) [1800012220]	Texas Water Development Board (TWDB)	The Texas Water Development Board (TWDB) funded the project (1800012220).		42	11	11	1	7	MDPI	BASEL	ST ALBAN-ANLAGE 66, CH-4052 BASEL, SWITZERLAND		1424-8220		SENSORS-BASEL	Sensors	DEC	2018	18	12
J	Chen, SS; Kimirei, IA; Yu, C; Shen, QS; Gao, Q				Chen, Sophia Shuang; Kimirei, Ismael Aaron; Yu, Cheng; Shen, Qiushi; Gao, Qun			Assessment of urban river water pollution with urbanization in East Africa	ENVIRONMENTAL SCIENCE AND POLLUTION RESEARCH			English	Article						Urban river; Gradient analysis; Water pollution; Urbanization; African cities	LAKE VICTORIA; QUALITY INDEXES; LAND-USE; STREAM; NUTRIENTS; IMPACT; CITY	Anthropogenic pollution plays an important part in deteriorating the water quality of rivers all over the world, especially in urban areas of Africa where water quality monitoring is still seriously constrained by the limited test facility and capability. In this study, for evaluating the impact of urbanization on the river water quality, we investigated four typical urban rivers of Tanzania thro…	[Chen, Sophia Shuang] Nanjing Univ Informat Sci & Technol, Res Ctr Urban Sustainable Dev, Sch Geog Sci, 219 Ningliu Rd, Nanjing 210044, Peoples R China; [Chen, Sophia Shuang; Shen, Qiushi; Gao, Qun] Chinese Acad Sci, Nanjing Inst Geog & Limnol, State Key Lab Lake Sci & Environm, Nanjing 210008, Peoples R China; [Kimirei, Ismael Aaron] Tanzania Fisheries Res Inst, POB 9750, Dar Es Salaam, Tanzania…	Nanjing University of Information Science & Technology; Chinese Academy of Sciences; Nanjing Institute of Geography & Limnology, CAS	Chen, SS (corresponding author), Nanjing Univ Informat Sci & Technol, Res Ctr Urban Sustainable Dev, Sch Geog Sci, 219 Ningliu Rd, Nanjing 210044, Peoples R China.;Chen, SS (corresponding author), Chinese Acad Sci, Nanjing Inst Geog & Limnol, State Key Lab Lake Sci & Environm, Nanjing 210008, Peoples R China.;Yu, C (corresponding author), Su Zhou Univ Sci & Technol, Sch Geog Sci & Geomat Engn, Su…	schens@nuist.edu.cn; yucheng823@126.com	Kimirei, Ismael Aaron/F-7385-2012	Kimirei, Ismael Aaron/0000-0002-1101-5262; chen, shuang/0000-0001-6308-0958	National Key R&D Program of China [2018YFE0105900]; National Natural Science Foundation of China [41771140]; Sino-Africa Joint Research Center, Chinese Academy of Sciences [SAJC201609]; Startup Foundation for Introducing Talent of NUIST	National Key R&D Program of China; National Natural Science Foundation of China(National Natural Science Foundation of China (NSFC)); Sino-Africa Joint Research Center, Chinese Academy of Sciences; Startup Foundation for Introducing Talent of NUIST	The study was funded by the National Key R&D Program of China (2018YFE0105900), the National Natural Science Foundation of China (41771140), the Sino-Africa Joint Research Center, Chinese Academy of Sciences (NO. SAJC201609), and also partly by the Startup Foundation for Introducing Talent of NUIST.		56	10	10	24	74	SPRINGER HEIDELBERG	HEIDELBERG	TIERGARTENSTRASSE 17, D-69121 HEIDELBERG, GERMANY	0944-1344	1614-7499		ENVIRON SCI POLLUT R	Environ. Sci. Pollut. Res.	JUN	2022	29	27
J	Bresnahan, P; Cyronak, T; Brewin, RJW; Andersson, A; Wirth, T; Martz, T; Courtney, T; Hui, NT; Kastner, R; Stern, A; McGrain, T; Reinicke, D; Richard, J; Hammond, K; Waters, S				Bresnahan, Philip; Cyronak, Tyler; Brewin, Robert J. W.; Andersson, Andreas; Wirth, Taylor; Martz, Todd; Courtney, Travis; Hui, Nathan; Kastner, Ryan; Stern, Andrew; McGrain, Todd; Reinicke, Danica; Richard, Jon; Hammond, Katherine; Waters, Shannon			A high-tech, low-cost, Internet of Things surfboard fin for coastal citizen science, outreach, and education	CONTINENTAL SHELF RESEARCH			English	Article						Coastal oceanography; Citizen science; Surfing; Sea surface temperature; Outreach		Coastal populations and hazards are escalating simultaneously, leading to an increased importance of coastal ocean observations. Many well-established observational techniques are expensive, require complex technical training, and offer little to no public engagement. Smartfin, an oceanographic sensor-equipped surfboard fin and citizen science program, was designed to alleviate these issues. Smar…	[Bresnahan, Philip] Univ N Carolina, Dept Earth & Ocean Sci, Wilmington, NC 28403 USA; [Cyronak, Tyler] Nova Southeastern Univ, Halmos Coll Arts & Sci, Ft Lauderdale, FL USA; [Brewin, Robert J. W.] Univ Exeter, Coll Life & Environm Sci, Ctr Geog & Environm Sci, Penryn Campus, Penryn, Cornwall, England; [Andersson, Andreas; Wirth, Taylor; Martz, Todd; Courtney, Travis] Univ Calif San Diego, Scripp…	University of North Carolina; University of North Carolina Wilmington; Nova Southeastern University; University of Exeter; University of California System; University of California San Diego; Scripps Institution of Oceanography; University of Puerto Rico; University of Puerto Rico Mayaguez; University of California System; University of California San Diego	Bresnahan, P (corresponding author), Univ N Carolina, Dept Earth & Ocean Sci, Wilmington, NC 28403 USA.	bresnahanp@uncw.edu	Martz, Todd R/A-7704-2012; Bresnahan, Phil/HJP-0498-2023	Bresnahan, Phil/0000-0001-9432-752X; Cyronak, Tyler/0000-0003-3556-7616; Brewin, Robert/0000-0001-5134-8291	Lost Bird Project; SDGE; UKRI Future Leader Fellowship [MR/V022792/1]; National Science Foundation [OCE-1637632, IIS-1852403]	Lost Bird Project; SDGE; UKRI Future Leader Fellowship(UK Research & Innovation (UKRI)); National Science Foundation(National Science Foundation (NSF))	This work was funded by the Lost Bird Project and SDG&E. Robert Brewin was supported by a UKRI Future Leader Fellowship (MR/V022792/1) and REU students have been supported by the National Science Foundation (OCE-1637632 and IIS-1852403). E4E is supported in part by the National Science Foundation Grant IIS-1852403, UCSD Qualcomm Institute, UCSD Department of Computer Science and Engineering, UCSD…		38	2	2	3	8	PERGAMON-ELSEVIER SCIENCE LTD	OXFORD	THE BOULEVARD, LANGFORD LANE, KIDLINGTON, OXFORD OX5 1GB, ENGLAND	0278-4343	1873-6955		CONT SHELF RES	Cont. Shelf Res.	2023-06-01	2022	242
J	Dang, TJ; Liu, JF				Dang, Tianjiao; Liu, Jifa			Design of Water Quality Monitoring System in Shaanxi Section of Weihe River Basin Based on the Internet of Things	COMPUTATIONAL INTELLIGENCE AND NEUROSCIENCE			English	Article								Monitoring environmental water quality in an efficient, cheap, and sustainable way can better serve the country's strategic requirements for water resources and water ecological protection. This paper takes the Shaanxi section of the Weihe River Basin as a pilot project and aims to use the Internet of Things technology to develop water quality monitoring sensors, so as to realize the construction…	[Dang, Tianjiao; Liu, Jifa] Changan Univ, Sch Marxism, Xian, Peoples R China	Chang'an University	Dang, TJ (corresponding author), Changan Univ, Sch Marxism, Xian, Peoples R China.	2020016001@chd.edu.cn; liuj@chd.edu.cn							29	0	0	16	30	HINDAWI LTD	LONDON	ADAM HOUSE, 3RD FLR, 1 FITZROY SQ, LONDON, W1T 5HF, ENGLAND	1687-5265	1687-5273		COMPUT INTEL NEUROSC	Comput. Intell. Neurosci.	2023-07-21	2022	2022
J	Casper, AF; Dixon, B; Steimle, ET; Hall, ML; Conmy, RN				Casper, Andrew F.; Dixon, Barnali; Steimle, Eric T.; Hall, Mike L.; Conmy, Robyn N.			Scales of heterogeneity of water quality in rivers: Insights from high resolution maps based on integrated geospatial, sensor and ROV technologies	APPLIED GEOGRAPHY			English	Article						GIS; Water quality; Sampling; Groundwater; Riverine; ROV; Spatial heterogeneity	AUTONOMOUS UNDERWATER VEHICLES; SUBMERGED SINKHOLE; VARIABILITY; ECOSYSTEM; PATTERNS; DAMS	While the spatial heterogeneity of many aquatic ecosystems is acknowledged, rivers are often mistakenly described as homogenous and well-mixed. The collection and visualization of attributes like water quality is key to our perception and management of these ecosystems. The assumption of homogeneity can lead to the conclusion that data collection from discrete, discontinuous points in space or ti…	[Casper, Andrew F.; Conmy, Robyn N.] US EPA, Gulf Ecol Div, Gulf Breeze, FL 32561 USA; [Dixon, Barnali] Univ S Florida, Geospatial Analyt Lab, Environm Sci Geog & Policy Program, St Petersburg, FL 33701 USA; [Steimle, Eric T.; Hall, Mike L.] Aeos Appl Environm & Ocean Sci, St Petersburg, FL USA	United States Environmental Protection Agency; State University System of Florida; University of South Florida	Casper, AF (corresponding author), US EPA, Gulf Ecol Div, 1 Sabine Isl Dr, Gulf Breeze, FL 32561 USA.	andrew.f.casper@uasce.army.mil		Casper, Andrew/0000-0003-3450-0209					54	9	9	1	37	ELSEVIER SCI LTD	OXFORD	THE BOULEVARD, LANGFORD LANE, KIDLINGTON, OXFORD OX5 1GB, OXON, ENGLAND	0143-6228	1873-7730		APPL GEOGR	Appl. Geogr.	MAR	2012	32	2
J	Garcia-Lopez, S; Ruiz-Ortiz, V; Barbero, L; Sanchez-Bellon, A				Garcia-Lopez, Santiago; Ruiz-Ortiz, Veronica; Barbero, Luis; Sanchez-Bellon, Angel			Contribution of the UAS to the determination of the water budget in a coastal wetland: a case study in the natural park of the Bay of Cadiz (SW Spain)	EUROPEAN JOURNAL OF REMOTE SENSING			English	Article						Wetlands; water budget; unmanned aerial systems (UAS); low-cost photogrammetry; structure from motion; digital terrain model (DTM)	PHOTOGRAMMETRY; MANAGEMENT; IMAGERY; QUALITY; MODELS; RIVER	Wetlands are sensitive and complex systems whose conservation is a priority. For the correct understanding of their hydrological dynamics, it is necessary to determine the different elements of the water budget and, in particular, the geometry of the wetland basin in order to estimate the variations in storage capacity. This paper presents a novel, low-cost, user-friendly photogrammetric techniqu…	[Garcia-Lopez, Santiago; Barbero, Luis; Sanchez-Bellon, Angel] Univ Cadiz, Dept Earth Sci, Cadiz, Spain; [Ruiz-Ortiz, Veronica] Univ Cadiz, Dept Ind Engn & Civil Engn, Cadiz, Spain	Universidad de Cadiz; Universidad de Cadiz	Garcia-Lopez, S (corresponding author), Univ Cadiz, Dept Earth Sci, Cadiz, Spain.	santiago.garcia@uca.es	Ruiz-Ortiz, Verónica/AAH-9291-2020; Bellón, Ángel Sánchez/M-1783-2014; Barbero, Luis/E-4078-2013; López, Santiago García/AAT-8677-2020	Ruiz-Ortiz, Verónica/0000-0001-7638-1135; Bellón, Ángel Sánchez/0000-0003-1809-663X; Barbero, Luis/0000-0002-3513-2025; Garcia Lopez, Santiago/0000-0002-1245-7169	Proyecto de Infraestructuras MINECO-FEDER UNCA [2013-1E-1969]	Proyecto de Infraestructuras MINECO-FEDER UNCA	This work is supported by Proyecto de Infraestructuras MINECO-FEDER UNCA [grant number 2013-1E-1969].		38	8	9	0	3	TAYLOR & FRANCIS LTD	ABINGDON	2-4 PARK SQUARE, MILTON PARK, ABINGDON OR14 4RN, OXON, ENGLAND		2279-7254		EUR J REMOTE SENS	Eur. J. Remote Sens.		2018	51	1
J	Veronez, MR; Kupssinsku, LS; Guimaraes, TT; Koste, EC; da Silva, JM; de Souza, LV; Oliverio, WFM; Jardim, RS; Koch, IE; de Souza, JG; Gonzaga, L; Mauad, FF; Inocencio, LC; Bordin, F				Veronez, Mauricio R.; Kupssinsku, Lucas S.; Guimaraes, Taina T.; Koste, Emilie C.; da Silva, Juarez M.; de Souza, Lais V.; Oliverio, William F. M.; Jardim, Rogelio S.; Koch, Ismael E.; de Souza, Jonas G.; Gonzaga, Luiz, Jr.; Mauad, Frederico F.; Inocencio, Leonardo C.; Bordin, Fabiane			Proposal of a Method to Determine the Correlation between Total Suspended Solids and Dissolved Organic Matter in Water Bodies from Spectral Imaging and Artificial Neural Networks	SENSORS			English	Article						spectral imaging; unmanned aerial vehicles; correlation; water quality monitoring; artificial neural networks	UNMANNED AERIAL VEHICLE; AQUATIC VEGETATION; SATELLITE DATA; LAKE DISTRICT; TROPHIC STATE; REFLECTANCE; QUALITY; CHLOROPHYLL; SENSORS; URBAN	Water quality monitoring through remote sensing with UAVs is best conducted using multispectral sensors; however, these sensors are expensive. We aimed to predict multispectral bands from a low-cost sensor (R, G, B bands) using artificial neural networks (ANN). We studied a lake located on the campus of Unisinos University, Brazil, using a low-cost sensor mounted on a UAV. Simultaneously, we coll…	[Veronez, Mauricio R.; Koste, Emilie C.; Gonzaga, Luiz, Jr.; Inocencio, Leonardo C.; Bordin, Fabiane] Unisinos Univ, VizLab, Adv Visualizat & Geoinformat Lab, BR-93022750 Sao Leopoldo, Brazil; [Veronez, Mauricio R.; de Souza, Lais V.] Unisinos Univ, Grad Programme Geol, BR-93022750 Sao Leopoldo, Brazil; [Veronez, Mauricio R.; Kupssinsku, Lucas S.; da Silva, Juarez M.; Oliverio, William F. M.; Jar…	Universidade de Sao Paulo	Veronez, MR (corresponding author), Unisinos Univ, VizLab, Adv Visualizat & Geoinformat Lab, BR-93022750 Sao Leopoldo, Brazil.;Veronez, MR (corresponding author), Unisinos Univ, Grad Programme Geol, BR-93022750 Sao Leopoldo, Brazil.;Veronez, MR (corresponding author), Unisinos Univ, Grad Programme Appl Comp, BR-93022750 Sao Leopoldo, Brazil.	veronez@unisinos.br; lkupssinsku@edu.unisinos.br; tainathomg@usp.br; emiliek@edu.unisinos.br; juarezmachado@edu.unisinos.br; laisvs@edu.unisinos.br; williamoliverio@edu.unisinos.br; rogeliosj@edu.unisinos.br; iekoch@edu.unisinos.br; jonassouza@edu.unisinos.br; lgonzaga@unisinos.br; mauadffm@sc.usp.br; lcinocencio@unisinos.br; fabianebor@unisinos.br	Souza, Laís/U-3889-2019; Mauad, Frederico/AAR-7002-2021; VERONEZ, MAURICIO Roberto/D-9924-2013; Bordin, Fabiane/B-1486-2014; Kupssinskü, Lucas/T-6323-2019; Inocencio, Leonardo Campos/HTM-2460-2023	Mauad, Frederico/0000-0002-2477-2019; VERONEZ, MAURICIO Roberto/0000-0002-5914-3546; Bordin, Fabiane/0000-0003-0037-4099; Kupssinskü, Lucas/0000-0003-2580-3996; Gonzaga Jr, Luiz/0000-0002-7661-2447; Koch, Ismael/0000-0003-3562-8554; Campos Inocencio, Leonardo/0000-0003-1156-7750; Guimaraes, Taina/0000-0002-6362-6591	Brazilian Council for Scientific and Technological Development (CNPq) [309399/2014-9]; PROSUP/CAPES; DS/CAPES; CNPq	Brazilian Council for Scientific and Technological Development (CNPq)(Conselho Nacional de Desenvolvimento Cientifico e Tecnologico (CNPQ)); PROSUP/CAPES(Coordenacao de Aperfeicoamento de Pessoal de Nivel Superior (CAPES)); DS/CAPES; CNPq(Conselho Nacional de Desenvolvimento Cientifico e Tecnologico (CNPQ))	M.R.V. thanks the Brazilian Council for Scientific and Technological Development (CNPq) for the research grant (process 309399/2014-9). L.V.S. thanks PROSUP/CAPES for the financial support of the PhD scholarship. L.S.K., J.M.S., and I.E.K. thank PROSUP/CAPES for the financial support of the MSc scholarship. T.T.G. thanks DS/CAPES for the financial support of the MSc scholarship. J.M.S. thanks CNP…		40	11	11	1	24	MDPI AG	BASEL	ST ALBAN-ANLAGE 66, CH-4052 BASEL, SWITZERLAND	1424-8220			SENSORS-BASEL	Sensors	JAN	2018	18	1
J	Eaton, TT				Eaton, Timothy T.			Tidal reversal and flow velocities using temperature and specific conductance in a small wetland creek	JOURNAL OF HYDROLOGY			English	Article						Wetland creek; Tidal intrusion; Low cost; Advection; Heat and specific conductance tracers	STREAM TEMPERATURE; RIVER DISCHARGE; WATER; VARIABILITY; SALINITY; CHANNELS; ESTUARY; BUDGET	Characterizing flow dynamics in very small tidal creeks is complicated and not well suited to methods developed for upland streams or coastal estuaries, due to low flows, bidirectionality and shallow waters. Simple instrumentation enables thermal and salinity signals to be used to observe flow directions and estimate velocities in these settings. Using multiple inexpensive sensors over 500 m alon…	[Eaton, Timothy T.] CUNY Queens Coll, Sch Earth & Environm Sci, 6530 Kissena Blvd, Flushing, NY 11355 USA	City University of New York (CUNY) System; Queens College NY (CUNY)	Eaton, TT (corresponding author), CUNY Queens Coll, Sch Earth & Environm Sci, 6530 Kissena Blvd, Flushing, NY 11355 USA.	Timothy.Eaton@qc.cuny.edu			PSC-CUNY Research Award [66586-00 44]	PSC-CUNY Research Award	The assistance of Brice Lynch and Fung Liew in installing and retrieving instrumentation at the wetland field sites is greatly appreciated. The comments of Dr. Luca Carniello and another anonymous reviewer, as well as the suggestions of the Associate Editor, greatly improved this paper. This work was funded under PSC-CUNY Research Award 66586-00 44.		49	3	3	1	22	ELSEVIER	AMSTERDAM	RADARWEG 29, 1043 NX AMSTERDAM, NETHERLANDS	0022-1694	1879-2707		J HYDROL	J. Hydrol.	NOV	2016	542
J	Cherif, E; Salmoun, F; Mesas-Carrascosa, FJ				Cherif, El Khalil; Salmoun, Farida; Javier Mesas-Carrascosa, Francisco			Determination of Bathing Water Quality Using Thermal Images Landsat 8 on the West Coast of Tangier: Preliminary Results	REMOTE SENSING			English	Article						bathing waters; water quality; bacteriological contaminants; temperature	GEOGRAPHIC INFORMATION-SYSTEMS; SURFACE TEMPERATURE; WASTE-WATER; EL-JADIDA; DISCHARGE ZONE; INFRARED DATA; RAW SEWAGE; SATELLITE; VARIABILITY; VALIDATION	Bathing water quality has been monitored in the west coast of Tangier, Morocco due to increased urban and industrial discharge through the Boukhalef river, using in-situ bacteriological measurements which demand high economical and temporal costs. In this study, Landsat 8 Thermal Infrared Sensor (TIRS) images were used as an alternative to the classical method, for determining bathing water quali…	[Cherif, El Khalil; Salmoun, Farida] Abdelmalek Essaadi Univ, Fac Sci & Technol, Lab Phys Chem Mat Nat Subst & Environm, Tangier 90090, Morocco; [Javier Mesas-Carrascosa, Francisco] Univ Cordoba, Dept Graph Engn & Geomat, Campus Rabanales, E-14071 Cordoba, Spain	Abdelmalek Essaadi University of Tetouan; Universidad de Cordoba	Cherif, E (corresponding author), Abdelmalek Essaadi Univ, Fac Sci & Technol, Lab Phys Chem Mat Nat Subst & Environm, Tangier 90090, Morocco.	c.elkhalil@uae.ac.ma; salfari2001@yahoo.fr; fjmesas@uco.es	jin, qiwen/HOH-1992-2023; CHERIF, El Khalil/AAC-4941-2021; Mesas-Carrascosa, Francisco Javier/L-3094-2017	jin, qiwen/0000-0001-7432-900X; CHERIF, El Khalil/0000-0002-8583-632X; Mesas-Carrascosa, Francisco Javier/0000-0002-5674-1292					77	16	16	0	6	MDPI	BASEL	ST ALBAN-ANLAGE 66, CH-4052 BASEL, SWITZERLAND		2072-4292		REMOTE SENS-BASEL	Remote Sens.	2023-04-02	2019	11	8
J	Tiberti, R; Caroni, R; Cannata, M; Lami, A; Manca, D; Strigaro, D; Rogora, M				Tiberti, Rocco; Caroni, Rossana; Cannata, Massimiliano; Lami, Andrea; Manca, Dario; Strigaro, Daniele; Rogora, Michela			Automated high frequency monitoring of Lake Maggiore through in situ sensors: system design, field test and data quality control	JOURNAL OF LIMNOLOGY			English	Article						Water quality; chlorophyll; data management; sensors; SIMILE project	SUB-ALPINE LAKE; CHLOROPHYLL; MANAGEMENT; EFFICIENCY; INFLOWS; NETWORK; BLOOMS	A high frequency monitoring (HFM) system for the deep subalpine lakes Maggiore, Lugano and Como is under development within the EU INTERREG project SIMILE. The HFM system is designed to i) describe often neglected but potentially relevant processes occurring on short time scale; ii) become a cost-effective source of environmental data; and iii) strengthen the coordinated management of water resou…	[Tiberti, Rocco; Caroni, Rossana; Lami, Andrea; Manca, Dario; Rogora, Michela] Natl Res Council Italy, Water Res Inst CNR IRSA, Largo Tonolli 50, I-28922 Verbania, Italy; [Cannata, Massimiliano; Strigaro, Daniele] Univ Appl Sci Southern Switzerland SUPS, Inst Earth Sci, Dept Environm Construct & Design, Campus Mendrisio,Via Francesco Catenazzi 23, CH-6850 Mendrisio, Switzerland; [Strigaro, Daniel…	Consiglio Nazionale delle Ricerche (CNR); Istituto di Ricerca sulle Acque (IRSA-CNR); University of Pavia	Rogora, M (corresponding author), Natl Res Council Italy, Water Res Inst CNR IRSA, Largo Tonolli 50, I-28922 Verbania, Italy.	michela.rogora@cnr.it	ROGORA, MICHELA/AAA-6590-2022; Lami, Andrea/F-1415-2013; Tiberti, Rocco/AAM-7103-2021	ROGORA, MICHELA/0000-0003-3515-0220; Lami, Andrea/0000-0003-3627-0363; Tiberti, Rocco/0000-0003-1617-8826; Strigaro, Daniele/0000-0002-7040-4364	SIMILE, an Interreg Italian-Swiss project - European Regional Development Fund (ERDF) [523544]	SIMILE, an Interreg Italian-Swiss project - European Regional Development Fund (ERDF)	This work was supported by SIMILE (ID: 523544), an Interreg Italian-Swiss project funded by the European Regional Development Fund (ERDF). The Chlorella culture for the Chl sensor calibration experiment was kindly provided by Roberta. Piscia (CNR -IRSA, Verbania). We are grateful to Cristiana Callieri for her support during the laboratory work for sensor calibration. We are also indebted with Pao…		71	8	8	2	12	PAGEPRESS PUBL	PAVIA	MEDITGROUP, VIA G BELLI, 4, PAVIA, 27100, ITALY	1129-5767	1723-8633		J LIMNOL	J. Limnol.		2021	80	2
S	Sa'at, NIM; Daud, SM; Mantoro, T		Yusop, Z; Aris, A; Alias, NE; Annammala, KV; Waugh, WL		Sa'at, Nurul Iman Mohd; Daud, Salwani Mohd; Mantoro, Teddy			FLOOD MONITORING SYSTEM USING MOBILE SCADA BASED ON MULTIPLE ENVIRONMENT INDICATIONS	IMPROVING FLOOD MANAGEMENT, PREDICTION AND MONITORING: CASE STUDIES IN ASIA	Community Environment and Disaster Risk Management		English	Article; Book Chapter						Mobile SCADA; flood monitoring; ubiquitous; low cost; real-time; monitoring system		The impact of mitigating flood occurrence in the rural and urban areas has become crucial as it has affected government policies for countries that are prone to flood disaster. Efforts and funds have been put up to a higher level of capabilities to ensure that coping and managing flood disaster could be resolved. Several initiatives made in managing flood are: effectively monitoring the potential…	[Sa'at, Nurul Iman Mohd] Univ Teknol Malaysia, Fac Adv Informat Sch, Kuala Lumpur, Malaysia; [Sa'at, Nurul Iman Mohd] UTM Kuala Lumpur, Adv Informat Sch, IOT Devices Dev Lab, Kuala Lumpur, Malaysia; [Sa'at, Nurul Iman Mohd] Razak Fac Technol & Informat, Kuala Lumpur, Malaysia; [Daud, Salwani Mohd] UTM, Razak Fac Technol & Informat, Kuala Lumpur, Malaysia; [Mantoro, Teddy] Sampoerna Univ, USBI, So…	Universiti Teknologi Malaysia; Universiti Teknologi Malaysia; Universiti Teknologi Malaysia	Sa'at, NIM (corresponding author), Univ Teknol Malaysia, Fac Adv Informat Sch, Kuala Lumpur, Malaysia.;Sa'at, NIM (corresponding author), Razak Fac Technol & Informat, Kuala Lumpur, Malaysia.								12	0	0	0	0	EMERALD GROUP PUBLISHING LTD	BINGLEY	HOWARD HOUSE, WAGON LANE, BINGLEY, W YORKSHIRE BD16 1WA, ENGLAND	2040-7262		978-1-78756-551-7; 978-1-78756-552-4	COMM ENV DISAST RISK			2019	20
J	Cheng, C; Wang, ST; Wu, JN; Yu, YC; Li, RZ; Eda, S; Chen, JG; Feng, GY; Lawrie, B; Hu, AM				Cheng, Cheng; Wang, Shutong; Wu, Jayne; Yu, Yongchao; Li, Ruozhou; Eda, Shigetoshi; Chen, Jiangang; Feng, Guoying; Lawrie, Benjamin; Hu, Anming			Bisphenol A Sensors on Polyimide Fabricated by Laser Direct Writing for Onsite River Water Monitoring at Attomolar Concentration	ACS APPLIED MATERIALS & INTERFACES			English	Article						capacitive sensing; ac electroosmosis; aptasensor; point of care; laser direct writing	COMPETITIVE IMMUNOASSAY; SENSITIVE DETECTION; SURFACE-WATER; IMMUNOSENSOR; GRAPHENE; STEP; SERODIAGNOSIS; APTAMERS; FIELDS; FLUIDS	This work presents an aptamer-based, highly sensitive and specific sensor for atto- to femtomolar level detection of bisphenol A (BPA). Because of its widespread use in numerous products, BPA enters surface water from effluent discharges during its manufacture, use, and from waste landfill sites throughout the world. On-site measurement of BPA concentrations in water is important for evaluating c…	[Cheng, Cheng; Wu, Jayne] Univ Tennessee, Dept Elect Engn & Comp Sci, 1520 Middle Dr, Knoxville, TN 37996 USA; [Wang, Shutong; Yu, Yongchao; Li, Ruozhou; Hu, Anming] Univ Tennessee, Dept Mech Aerosp & Biomed Engn, 1512 Middle Dr, Knoxville, TN 37996 USA; [Eda, Shigetoshi] Univ Tennessee, Inst Agr, Dept Forestry Wildlife & Fisheries, 2431 Joe Johnson Dr, Knoxville, TN 37996 USA; [Chen, Jiangang] U…	University of Tennessee System; University of Tennessee Knoxville; University of Tennessee System; University of Tennessee Knoxville; University of Tennessee System; University of Tennessee Knoxville; UT Institute of Agriculture; University of Tennessee System; University of Tennessee Knoxville; Sichuan University; United States Department of Energy (DOE); Oak Ridge National Laboratory; Beijing U…	Wu, JN (corresponding author), Univ Tennessee, Dept Elect Engn & Comp Sci, 1520 Middle Dr, Knoxville, TN 37996 USA.;Hu, AM (corresponding author), Univ Tennessee, Dept Mech Aerosp & Biomed Engn, 1512 Middle Dr, Knoxville, TN 37996 USA.;Hu, AM (corresponding author), Beijing Univ Technol, Inst Laser Engn, 100 Pingleyuan, Beijing 100124, Peoples R China.	jaynewu@utk.edu; ahu3@utk.edu	Hu, Anming/E-7370-2011; Hu, Anming/AAQ-5592-2020; Lawrie, Ben/B-7182-2016; Cheng, Cheng/L-9403-2016; Wu, Jayne/A-8871-2009; Li, Ruozhou/AAX-6387-2021	Hu, Anming/0000-0001-9794-0549; Lawrie, Ben/0000-0003-1431-066X; Cheng, Cheng/0000-0002-5401-6185; Wu, Jayne/0000-0001-5143-9425; Li, Ruozhou/0000-0002-2615-9349	University of Tennessee Organized Research Unit Initiative for PON/POC Nanobiosensing; University of Tennessee Center for Wildlife Health; University of Tennessee; University of Tennessee Knoxville (UTK); Oak Ridge National Laboratory (ORNL), Nature Science Foundation of China (NSFC) [51575016]; Beijing Natural Science Foundation [KZ20141000500]; U.S. Department of Energy [DE-AC05-00OR22725]	University of Tennessee Organized Research Unit Initiative for PON/POC Nanobiosensing; University of Tennessee Center for Wildlife Health; University of Tennessee; University of Tennessee Knoxville (UTK); Oak Ridge National Laboratory (ORNL), Nature Science Foundation of China (NSFC); Beijing Natural Science Foundation(Beijing Natural Science Foundation); U.S. Department of Energy(United States D…	J. Wu, J. Chen, and A. Hu acknowledge the support of the University of Tennessee Organized Research Unit Initiative for PON/POC Nanobiosensing. BPA detection work was supported by the University of Tennessee Center for Wildlife Health. A. Hu acknowledged the research initiative funding provided by the University of Tennessee as a new hire package. This nanomanufacturing research was supported in …		60	83	85	5	116	AMER CHEMICAL SOC	WASHINGTON	1155 16TH ST, NW, WASHINGTON, DC 20036 USA	1944-8244	1944-8252		ACS APPL MATER INTER	ACS Appl. Mater. Interfaces	2023-07-20	2016	8	28
J	Samarinas, N; Spiliotopoulos, M; Tziolas, N; Loukas, A				Samarinas, Nikiforos; Spiliotopoulos, Marios; Tziolas, Nikolaos; Loukas, Athanasios			Synergistic Use of Earth Observation Driven Techniques to Support the Implementation of Water Framework Directive in Europe: A Review	REMOTE SENSING			English	Review						water resources management; algal blooms; water quality; European policies	CHLOROPHYLL-A; SPECTRAL REFLECTANCE; COASTAL WATERS; SHALLOW WATERS; SENTINEL-2 MSI; SATELLITE DATA; QUALITY; RETRIEVAL; INLAND; LAKES	The development of a sustainable water quality monitoring system at national scale remains a big challenge until today, acting as a hindrance for the efficient implementation of the Water Framework Directive (WFD). This work provides valuable insights into the current state-of-the-art Earth Observation (EO) tools and services, proposing a synergistic use of innovative remote sensing technologies,…	[Samarinas, Nikiforos; Loukas, Athanasios] Aristotle Univ Thessaloniki, Dept Rural & Surveying Engn, Thessaloniki 54124, Greece; [Spiliotopoulos, Marios] Univ Thessaly, Dept Civil Engn, Volos 38221, Greece; [Tziolas, Nikolaos] Aristotle Univ Thessaloniki, Fac Agr Forestry & Nat Environm, Sch Agr, Thessaloniki 54123, Greece; [Tziolas, Nikolaos] Univ Florida, Inst Food & Agr Sci, Southwest Florida …	Aristotle University of Thessaloniki; University of Thessaly; Aristotle University of Thessaloniki; State University System of Florida; University of Florida	Samarinas, N (corresponding author), Aristotle Univ Thessaloniki, Dept Rural & Surveying Engn, Thessaloniki 54124, Greece.	smnikiforos@topo.auth.gr		Tziolas, Nikolaos/0000-0002-1502-3219; LOUKAS, ATHANASIOS/0000-0001-7597-9805; Spiliotopoulos, Marios/0000-0001-6992-8657					137	0	0	4	4	MDPI	BASEL	ST ALBAN-ANLAGE 66, CH-4052 BASEL, SWITZERLAND		2072-4292		REMOTE SENS-BASEL	Remote Sens.	APR	2023	15	8
J	Lim, HS; Jafri, MZM; Abdullah, K; Abu Bakar, MN				Lim, H. S.; Jafri, M. Z. Mat; Abdullah, K.; Abu Bakar, M. N.			Water quality mapping using digital camera images	INTERNATIONAL JOURNAL OF REMOTE SENSING			English	Article							SUSPENDED PARTICULATE MATTER; AIRBORNE THEMATIC MAPPER; CHLOROPHYLL-A; COASTAL WATERS; ATMOSPHERIC CORRECTION; RADIOMETRIC CORRECTION; BIOOPTICAL PROPERTIES; OPTICAL-PROPERTIES; LANDSAT TM; LAKE	The objective of this study was to implement a low-cost airborne remote sensing system to provide an alternative solution for remote sensing given the difficulty in obtaining cloud-free satellite scenes of the equatorial region. An inexpensive sensor, a Kodak DC 290 digital camera, was used, onboard a light aircraft, Cessna 172Q. The feasibility of using camera images for remote sensing applicati…	[Lim, H. S.; Jafri, M. Z. Mat; Abdullah, K.; Abu Bakar, M. N.] Univ Sains Malaysia, Sch Phys, George Town 11800, Malaysia	Universiti Sains Malaysia	Lim, HS (corresponding author), Univ Sains Malaysia, Sch Phys, George Town 11800, Malaysia.	hslim111@yahoo.com.sg	MatJafri, Mohd Zubir/F-6340-2010; ABDULLAH, KHIRUDDIN/B-4752-2011; San Lim, Hwee/F-6580-2010	MatJafri, Mohd Zubir/0000-0001-9313-7548; San Lim, Hwee/0000-0002-4835-8015	Malaysian Government [08-02-05-6011]; USM [FPP2001/130]	Malaysian Government; USM	This project was funded in part by Malaysian Government IRPA grant no. 08-02-05-6011 and USM short-term grant FPP2001/130. We thank the technical staff and research officers who participated in this project.		82	4	4	1	21	TAYLOR & FRANCIS LTD	ABINGDON	2-4 PARK SQUARE, MILTON PARK, ABINGDON OR14 4RN, OXON, ENGLAND	0143-1161	1366-5901		INT J REMOTE SENS	Int. J. Remote Sens.		2010	31	19
J	Prudkin-Silva, C; Lanzarotti, E; Alvarez, L; Vallerga, MB; Factorovich, M; Morzan, UN; Gomez, MP; Gonzalez, NP; Acosta, YM; Carrizo, F; Carrizo, E; Galeano, S; Lagorio, MG; Juarez, AB; Ithuralde, RE; Romero, JM; Urdampilleta, CM				Prudkin-Silva, Cecilia; Lanzarotti, Esteban; Alvarez, Lucia; Belen Vallerga, Maria; Factorovich, Matias; Morzan, Uriel N.; Petrona Gomez, Margarita; Paula Gonzalez, Natalia; Micaela Acosta, Yamila; Carrizo, Felicitas; Carrizo, Emilio; Galeano, Silvio; Gabriela Lagorio, Maria; Beatriz Juarez, Angela; Esteban Ithuralde, Raul; Manuel Romero, Juan; Maria Urdampilleta, Constanza			A cost-effective algae-based biosensor for water quality analysis: Development and testing in collaboration with peasant communities	ENVIRONMENTAL TECHNOLOGY & INNOVATION			English	Article						Pesticide detection; Rural communities; Absorbance; Alginate matrix; Fluorescence; Naked-eye detection	WHOLE-CELL; FLUORESCENCE	New anthropic potentially harmful compounds are released into the environment everyday. In this context, broad range bioassays have emerged providing economically viable and widely applicable alternatives due to their ability to detect the cumulative toxicity of mixtures of both known and unknown chemicals in a sample, thus allowing direct information about water quality. Here we present a low-co…	[Prudkin-Silva, Cecilia; Lanzarotti, Esteban; Alvarez, Lucia; Belen Vallerga, Maria; Factorovich, Matias; Morzan, Uriel N.; Esteban Ithuralde, Raul; Manuel Romero, Juan; Maria Urdampilleta, Constanza] Univ Buenos Aires, Fac Ciencias Exactas & Nat, Grp CoSensores, Buenos Aires, DF, Argentina; [Lanzarotti, Esteban] Univ Buenos Aires, Fac Ciencias Exactas & Nat, Dept Comp, Buenos Aires, DF, Argentin…	University of Buenos Aires; University of Buenos Aires; University of Buenos Aires; Consejo Nacional de Investigaciones Cientificas y Tecnicas (CONICET); University of Buenos Aires; Consejo Nacional de Investigaciones Cientificas y Tecnicas (CONICET); University of Buenos Aires; University of Buenos Aires; European Molecular Biology Laboratory (EMBL); Abdus Salam International Centre for Theoreti…	Romero, JM (corresponding author), Univ Buenos Aires, Fac Ciencias Exactas & Nat, Grp CoSensores, Buenos Aires, DF, Argentina.	juanm.romero18@gmail.com	Morzan, Uriel/GPW-8125-2022; Alvarez, Lucia/IUN-6247-2023	Prudkin Silva, Cecilia/0000-0001-8593-845X; Alvarez, Lucia/0000-0002-1437-5773; Morzan, Uriel Nicolas/0000-0002-3294-1441; Ithuralde, Raul Esteban/0000-0002-9757-0530	Ministry of Science, Technology and Innovation 2014 PROCODAS, Argentina grant; Ministry of Education 2015 Universidad, Diseno y Desarrollo Productivo, Argentina grant; University of Buenos Aires UBANEX, Argentina grant; School of Natural and Exact Sciences of the University of Buenos Aires Exactas con la Sociedad, Argentina grant	Ministry of Science, Technology and Innovation 2014 PROCODAS, Argentina grant; Ministry of Education 2015 Universidad, Diseno y Desarrollo Productivo, Argentina grant; University of Buenos Aires UBANEX, Argentina grant; School of Natural and Exact Sciences of the University of Buenos Aires Exactas con la Sociedad, Argentina grant	Images developed by Iconoclasistas (https://iconoclasistas.net/) were used in the graphical abstract. We want to thank the MoCaSE peasant movement and all its members for their everyday willingness and wisdom and, more importantly, their tireless fight for the right to land, food sovereignty and dignified life. We especially thank the Secretary of Health of MoCaSE, and in particular to Antonia Ro…		48	8	8	9	27	ELSEVIER	AMSTERDAM	RADARWEG 29, 1043 NX AMSTERDAM, NETHERLANDS	2352-1864			ENVIRON TECHNOL INNO	Environ. Technol. Innov.	MAY	2021	22
J	Kuwano, H; Katoh, T; Yasuda, K; Watanabe, T				Kuwano, H; Katoh, T; Yasuda, K; Watanabe, T			New multimedia communication services using sensing systems - Development of water-quality sensing network system	NTT REVIEW			English	Article								A new compact water-quality sensing module and a multimedia sensing network system have been developed to enable real-time, low-cost, wide-area monitoring of water. The sensing module and the system showed the effectiveness of environment monitoring of water. The sensing module is set directly in the water of rivers and lakes to measure several water qualities and is connected to a central workst…			Kuwano, H (corresponding author), NIPPON TELEGRAPH & TEL PUBL CORP, INTEGRATED INFORMAT & ENERGY SYST LABS, TOKYO, JAPAN.								4	1	2	0	1	NTT CORP	TOKYO	1-6 UCHISAIWAI-CHO 1 CHOME, CHIYODA-KU, TOKYO, 100, JAPAN	0915-2334			NTT REVIEW	Ntt Rev.	JAN	1997	9	1
J	Niroka, P; Panprayun, G; Peerakiatkhajohn, P				Niroka, Phatchareepho; Panprayun, Gunn; Peerakiatkhajohn, Piangjai			Performance of a Solar Greenhouse Dryer for Water Hyacinth	INTERNATIONAL ENERGY JOURNAL			English	Article						Relative humidity sensor; Solar greenhouse dryer; Solar dryer performance; Ventilation system; Water hyacinth	ENERGY DRYING SYSTEMS; DESIGN	The development of new methods to utilize solar energy is critical to lower greenhouse gas emissions and provide sustainable livelihoods for small business owners in rural areas. Solar greenhouse dryers are simple and low-cost structures that can be modified for a variety of applications. This study evaluated the performance of a solar greenhouse dryer for drying water hyacinth. The solar dryer w…	[Niroka, Phatchareepho; Panprayun, Gunn; Peerakiatkhajohn, Piangjai] Mahidol Univ, Fac Environm & Resource Studies, 999 Phuttamonthon Sai 4 Rd, Salaya 73170, Nakhon Pathom, Thailand	Mahidol University	Panprayun, G (corresponding author), Mahidol Univ, Fac Environm & Resource Studies, 999 Phuttamonthon Sai 4 Rd, Salaya 73170, Nakhon Pathom, Thailand.	gunn.pan@mahidol.edu			Faculty of Environment and Resource Studies of Mahidol University Alumni Association; Community Enterprise Nara Phirom Group Network	Faculty of Environment and Resource Studies of Mahidol University Alumni Association; Community Enterprise Nara Phirom Group Network	The authors would like to gratefully acknowledge the support of the Faculty of Environment and Resource Studies of Mahidol University Alumni Association and the Community Enterprise Nara Phirom Group Network.		33	0	0	1	1	REGIONAL ENERGY RESOURCES INFO CENTER	PATHUM THANI	ASIAN INST TECHNOLOGY, PO BOX 4, KLONG LUANG, PATHUM THANI 12120, THAILAND	1513-718X			INT ENERGY J	Int. Energy J.	JUN	2022	22	2
J	Jindal, H; Saxena, S; Kasana, SS				Jindal, Himanshu; Saxena, Sharad; Kasana, Singara Singh			A sustainable multi-parametric sensors network topology for river water quality monitoring	WIRELESS NETWORKS			English	Article						MPST; Monitoring; pH; Temperature; EC; River; Noise; Communication; Efficient	ENERGY	The deterioration of water quality due to natural and man-made hazards has affected the life on the Earth. Hence, water quality needs to be monitored regularly. The traditional approaches for monitoring are observed to be more expensive, time consuming with complex infrastructure and are less accurate. Therefore, there is a scope for improvement in monitoring approaches. For the purpose, the pape…	[Jindal, Himanshu; Saxena, Sharad; Kasana, Singara Singh] Thapar Univ, Comp Sci & Engn Dept, Patiala 147004, Punjab, India	Thapar Institute of Engineering & Technology	Saxena, S (corresponding author), Thapar Univ, Comp Sci & Engn Dept, Patiala 147004, Punjab, India.	himanshu.jindal@thapar.edu; sharad.saxena@thapar.edu; singara@thapar.edu	Jindal, Himanshu/AAM-5809-2020; Saxena, Sharad/AAM-4337-2020	Jindal, Himanshu/0000-0002-5595-5539; /0000-0002-4032-163X					31	20	20	0	7	SPRINGER	DORDRECHT	VAN GODEWIJCKSTRAAT 30, 3311 GZ DORDRECHT, NETHERLANDS	1022-0038	1572-8196		WIREL NETW	Wirel. Netw.	NOV	2018	24	8
J	Bramante, JF; Sin, TM				Bramante, James F.; Sin, Tsai Min			Optimization of a Semi-Analytical Algorithm for Multi-Temporal Water Quality Monitoring in Inland Waters with Wide Natural Variability	REMOTE SENSING			English	Article						semi-analytical bio-optical algorithm; hyperspectral; water quality monitoring; inland waters; Singapore	SPECTRAL ABSORPTION-COEFFICIENTS; REMOTE-SENSING REFLECTANCE; CHLOROPHYLL-A; OPTICAL-PROPERTIES; SHALLOW WATERS; PHYTOPLANKTON; COLOR; LAKE; RETRIEVAL; MODEL	Current spectrometer design and the increasingly affordable price of field hyperspectral sensors are making feasible their use for water quality monitoring. In this study, we parameterized a semi-analytical algorithm to derive constituent concentrations from field spectroradiometer measurements in ten freshwater reservoirs over two years. In contrast to algorithms parameterized for single airborn…	[Bramante, James F.; Sin, Tsai Min] Natl Univ Singapore, Trop Marine Sci Inst, Singapore 119227, Singapore	National University of Singapore	Bramante, JF (corresponding author), Natl Univ Singapore, Trop Marine Sci Inst, 18 Kent Ridge Rd, Singapore 119227, Singapore.	JBramante@whoi.edu; tmssintm@nus.edu.sg		Bramante, James/0000-0003-1127-2127	Tropical Marine Science Institute [N-347-000-014-001]	Tropical Marine Science Institute	We would like to thank Esther Clews and the freshwater team at Tropical Marine Science Institute, National University of Singapore for allowing us to accompany them in the field and for providing field logistics. This research was internally funded by the Tropical Marine Science Institute, internal grant number N-347-000-014-001.		55	2	2	0	35	MDPI	BASEL	ST ALBAN-ANLAGE 66, CH-4052 BASEL, SWITZERLAND		2072-4292		REMOTE SENS-BASEL	Remote Sens.	DEC	2015	7	12
J	Abolt, C; Caldwell, T; Wolaver, B; Pai, H				Abolt, Charles; Caldwell, Todd; Wolaver, Brad; Pai, Henry			Unmanned aerial vehicle-based monitoring of groundwater inputs to surface waters using an economical thermal infrared camera	OPTICAL ENGINEERING			English	Article						thermal imaging; uncooled; microbolometer; unmanned aerial vehicles; hydrology	NONUNIFORMITY CORRECTION; GLOBAL OPTIMIZATION; CALIBRATION; DISCHARGE; IMAGES; HETEROGENEITY; COMPENSATION; AQUIFER; RIVERS; STREAM	Groundwater discharge into streams helps maintain flows during droughts and provides refugia for thermally sensitive species, as the relatively constant temperature of spring water buffers against instream diurnal and seasonal fluctuations. Unmanned aerial vehicle (UAV)-based thermal imagery represents an attractive option to monitor sites of groundwater-surface water mixing. However, the use of …	[Abolt, Charles] Univ Texas Austin, Dept Geol Sci, Austin, TX 78712 USA; [Abolt, Charles; Caldwell, Todd; Wolaver, Brad] Univ Texas Austin, Bur Econ Geol, Austin, TX 78712 USA; [Pai, Henry] Univ Nevada, Dept Geol Sci & Engn, Reno, NV 89557 USA; [Pai, Henry] NOAA, Northwest River Forecast Ctr, Portland, OR USA	University of Texas System; University of Texas Austin; University of Texas System; University of Texas Austin; Nevada System of Higher Education (NSHE); University of Nevada Reno; National Oceanic Atmospheric Admin (NOAA) - USA	Abolt, C (corresponding author), Univ Texas Austin, Dept Geol Sci, Austin, TX 78712 USA.;Abolt, C (corresponding author), Univ Texas Austin, Bur Econ Geol, Austin, TX 78712 USA.	chuck.abolt@beg.utexas.edu	Caldwell, Todd Gregory/H-5129-2011; Wolaver, Brad/F-9790-2013	Caldwell, Todd Gregory/0000-0003-4068-0648; Wolaver, Brad/0000-0002-3834-9983; Pai, Henry/0000-0003-0396-7033	U.S. Fish and Wildlife Service and Texas Parks and Wildlife Department [TX E-173-R-1, F15AP00669]; Jackson School of Geosciences; NASA Earth and Space Science Fellowship program; Center for Transformative Environmental Monitoring Programs (CTEMPS) - National Science Foundation; TPWD	U.S. Fish and Wildlife Service and Texas Parks and Wildlife Department; Jackson School of Geosciences; NASA Earth and Space Science Fellowship program(National Aeronautics & Space Administration (NASA)); Center for Transformative Environmental Monitoring Programs (CTEMPS) - National Science Foundation; TPWD	Support for this project was provided in part by the U.S. Fish and Wildlife Service and Texas Parks and Wildlife Department (Grant #TX E-173-R-1, F15AP00669 to BW and TC), the Jackson School of Geosciences through a seed grant awarded to BW and TC, the NASA Earth and Space Science Fellowship program through an award to CA, and the Center for Transformative Environmental Monitoring Programs (CTEMP…		29	19	19	10	61	SPIE-SOC PHOTO-OPTICAL INSTRUMENTATION ENGINEERS	BELLINGHAM	1000 20TH ST, PO BOX 10, BELLINGHAM, WA 98225 USA	0091-3286	1560-2303		OPT ENG	Opt. Eng.	MAY	2018	57	5
J	Zhao, WR; Kang, TF; Xu, YH; Zhang, X; Liu, H; Ming, AJ; Lu, LP; Cheng, SY; Wei, F				Zhao, Wen-Rui; Kang, Tian-Fang; Xu, Yao-Hua; Zhang, Xiao; Liu, Hao; Ming, An-Jie; Lu, Li-Ping; Cheng, Shui-Yuan; Wei, Feng			Electrochemiluminescence solid-state imprinted sensor based on graphene/CdTe@ZnS quantum dots as luminescent probes for low-cost ultrasensing of diethylstilbestrol	SENSORS AND ACTUATORS B-CHEMICAL			English	Article						Diethylstilbestrol; Electrochemiluminescence sensor; Solid-state electrode; Molecularly imprinted film; Solid phase extraction; CdTe@ZnS quantum-dots	CARBON NANOTUBES; CAPPED CDTE; IMMUNOSENSOR; NANOPARTICLES; POLYMER; NANOCOMPOSITES; OXIDE; COMPOSITES; WATER; CDSE	A novel molecularly imprinted electrochemiluminescence (MIP-ECL) sensor was fabricated for diethylstilbestrol (DES), which exploited the strategy of specific identification by molecularly imprinted polymers (MIPs) instead of expensive biomolecules. Core-shell quantum-dots (QDs) of CdTe@ZnS were utilized to enhance ECL emission. The sensor was assembled as a solid-state electrode by immobilizing C…	[Zhao, Wen-Rui; Xu, Yao-Hua; Zhang, Xiao; Liu, Hao; Ming, An-Jie; Wei, Feng] Gen Res Inst Nonferrous Met, State Key Lab Adv Mat Smart Sensing, Beijing 100088, Peoples R China; [Zhao, Wen-Rui] GRIMAT Engn Inst Co Ltd, Beijing 101407, Peoples R China; [Kang, Tian-Fang; Lu, Li-Ping; Cheng, Shui-Yuan] Beijing Univ Technol, Coll Environm & Energy Engn, Key Lab Beijing Reg Air Pollut Control, Beijing 1…	General Research Institute for Nonferrous Metals; Beijing University of Technology	Zhao, WR; Wei, F (corresponding author), Gen Res Inst Nonferrous Met, State Key Lab Adv Mat Smart Sensing, Beijing 100088, Peoples R China.	zwr_0717@163.com; weifeng@grinm.com	Wei, Feng/AAD-4814-2020	Zhao, Wen-Rui/0000-0002-8811-1527	Key Research Project of National Natural Science Foundation of China [51638001]; National Natural Science Foundation of China [61874137]; GRINM Innovation Fund; Key Project of Beijing Natural Science Foundation [KZ201110005006]	Key Research Project of National Natural Science Foundation of China(National Natural Science Foundation of China (NSFC)); National Natural Science Foundation of China(National Natural Science Foundation of China (NSFC)); GRINM Innovation Fund; Key Project of Beijing Natural Science Foundation(Beijing Natural Science Foundation)	The authors thank the financial support from the Key Research Project of National Natural Science Foundation of China (No. 51638001), National Natural Science Foundation of China (No. 61874137), GRINM Innovation Fund, and the Key Project of Beijing Natural Science Foundation (No. KZ201110005006).		42	28	28	17	150	ELSEVIER SCIENCE SA	LAUSANNE	PO BOX 564, 1001 LAUSANNE, SWITZERLAND		0925-4005		SENSOR ACTUAT B-CHEM	Sens. Actuator B-Chem.	2023-03-01	2020	306
J	Karaoulis, M; Ritsema, I; Bremmer, C; De Kleine, M; Essink, GO; Ahlrichs, E				Karaoulis, Marios; Ritsema, Ipo; Bremmer, Chris; De Kleine, Marco; Essink, Gualbert Oude; Ahlrichs, Edvard			Drone-Borne Electromagnetic (DR-EM) Surveying in The Netherlands: Lab and Field Validation Results	REMOTE SENSING			English	Article						UAV; geophysics; electromagnetic; soil characterization; utility detection; water quality	GROUNDWATER	In the past decade, drones have become available and affordable for civil applications, including mapping and monitoring the Earth with geophysical sensors. In 2017 and 2019, the feasibility of executing frequency domain electromagnetic (FDEM) surveys using an off-the-shelf drone was investigated at Deltares Institute. This paper reports firstly the preparatory tests executed to determine the opt…	[Karaoulis, Marios; Ritsema, Ipo; Bremmer, Chris; Essink, Gualbert Oude; Ahlrichs, Edvard] Deltares, POB 85467, NL-3508 AL Utrecht, Netherlands; [De Kleine, Marco] Mdk Geol, Sprengenweg 1, NL-8181 NM Heerde, Netherlands; [Essink, Gualbert Oude] Univ Utrecht, Dept Phys Geog, Princetonlaan 8a, NL-3584 CB Utrecht, Netherlands	Deltares; Utrecht University	Karaoulis, M (corresponding author), Deltares, POB 85467, NL-3508 AL Utrecht, Netherlands.	marios.karaoulis@deltares.nl		Oude Essink, Gualbert/0000-0003-0931-6944					26	1	1	6	6	MDPI	BASEL	ST ALBAN-ANLAGE 66, CH-4052 BASEL, SWITZERLAND		2072-4292		REMOTE SENS-BASEL	Remote Sens.	NOV	2022	14	21
J	Xing, YP; Xue, BY; Lin, YS; Wu, XQ; Fang, F; Qi, PS; Guo, JS; Zhou, XH				Xing, Yunpeng; Xue, Boyuan; Lin, Yongshu; Wu, Xueqi; Fang, Fang; Qi, Peishi; Guo, Jinsong; Zhou, Xiaohong			A cellphone-based colorimetric multi-channel sensor for water environmental monitoring	FRONTIERS OF ENVIRONMENTAL SCIENCE & ENGINEERING			English	Article						Colorimetric analysis; Multi-channel sensor; Cellphone; Water quality indexes; Environmental monitoring	SMARTPHONE; BIOSENSOR	The development of colorimetric analysis technologies for the commercial cellphone platform has attracted great attention in environmental monitoring due to the low cost, high versatility, easy miniaturization, and widespread ownership of cellphones. This work demonstrates a cellphone-based colorimetric multi-channel sensor for quantifying multiple environmental contaminants simultaneously with h…	[Xing, Yunpeng; Qi, Peishi] Harbin Inst Technol, Sch Environm, State Key Lab Urban Water Resource & Environm, Harbin 150090, Peoples R China; [Xing, Yunpeng; Xue, Boyuan; Lin, Yongshu; Wu, Xueqi; Zhou, Xiaohong] Tsinghua Univ, Sch Environm, Ctr Sensor Technol Environm & Hlth, State Key Joint Lab ESPC, Beijing 100084, Peoples R China; [Fang, Fang; Guo, Jinsong] Chongqing Univ, Key Lab Three Gorges…	Harbin Institute of Technology; Tsinghua University; Chongqing University	Qi, PS (corresponding author), Harbin Inst Technol, Sch Environm, State Key Lab Urban Water Resource & Environm, Harbin 150090, Peoples R China.;Zhou, XH (corresponding author), Tsinghua Univ, Sch Environm, Ctr Sensor Technol Environm & Hlth, State Key Joint Lab ESPC, Beijing 100084, Peoples R China.;Guo, JS (corresponding author), Chongqing Univ, Key Lab Three Gorges Reservoir Reg Ecoenvirornm M…	qipeishi@163.com; guo0768@cqu.edu.cn; xhzhou@mail.tsinghua.edu.cn	Zhou, Xiaohong/GYJ-1053-2022		National Key Research and Development Program of China [2019YFD1100501]	National Key Research and Development Program of China	This research was supported by the National Key Research and Development Program of China (No. 2019YFD1100501).		32	0	0	15	37	HIGHER EDUCATION PRESS	BEIJING	CHAOYANG DIST, 4, HUIXINDONGJIE, FUSHENG BLDG, BEIJING 100029, PEOPLES R CHINA	2095-2201	2095-221X		FRONT ENV SCI ENG	Front. Env. Sci. Eng.	DEC	2022	16	12
J	Brewin, RJW; Brewin, TG; Phillips, J; Rose, S; Abdulaziz, A; Wimmer, W; Sathyendranath, S; Platt, T				Brewin, Robert J. W.; Brewin, Thomas G.; Phillips, Joseph; Rose, Sophie; Abdulaziz, Anas; Wimmer, Werenfrid; Sathyendranath, Shubha; Platt, Trevor			A Printable Device for Measuring Clarity and Colour in Lake and Nearshore Waters	SENSORS			English	Article						citizen science; 3D printing; water clarity; water colour; secchi disk	OCEAN COLOR; SECCHI DEPTH; BIODIVERSITY; SYSTEM; SCIENCE; COASTAL; ZONE; SEA	Two expanding areas of science and technology are citizen science and three-dimensional (3D) printing. Citizen science has a proven capability to generate reliable data and contribute to unexpected scientific discovery. It can put science into the hands of the citizens, increasing understanding, promoting environmental stewardship, and leading to the production of large databases for use in envir…	[Brewin, Robert J. W.; Sathyendranath, Shubha; Platt, Trevor] Plymouth Marine Lab, Plymouth PL1 3DH, Devon, England; [Brewin, Robert J. W.; Sathyendranath, Shubha] Plymouth Marine Lab, Natl Ctr Earth Observat, Plymouth PL1 3DH, Devon, England; [Brewin, Thomas G.; Phillips, Joseph; Rose, Sophie] Chatham & Clarendon Grammar Sch, Ramsgate CT11 9BB, Kent, England; [Phillips, Joseph; Rose, Sophie] Bou…	Plymouth Marine Laboratory; Plymouth Marine Laboratory; UK Research & Innovation (UKRI); Natural Environment Research Council (NERC); NERC National Centre for Earth Observation; Bournemouth University; Council of Scientific & Industrial Research (CSIR) - India; CSIR - National Institute of Oceanography (NIO); NERC National Oceanography Centre; University of Southampton	Brewin, RJW (corresponding author), Plymouth Marine Lab, Plymouth PL1 3DH, Devon, England.;Brewin, RJW (corresponding author), Plymouth Marine Lab, Natl Ctr Earth Observat, Plymouth PL1 3DH, Devon, England.	robr@pml.ac.uk; TBrewin@ccgrammarschool.co.uk; i7436610@bournemouth.ac.uk; i7447085@bournemouth.ac.uk; anasabdulaziz@gmail.com; w.wimmer@soton.ac.uk; ssat@pml.ac.uk; tplatt@dal.ca	Abdulaziz, Anas/AAI-5681-2020	Brewin, Robert/0000-0001-5134-8291; Abdulaziz, Anas/0000-0002-1396-3645; Sathyendranath, Shubha/0000-0003-3586-192X	Rehabilitation of Vibrio-infested waters of Lake Vembanad (REVIVAL) project, India-UKWater Quality Initiative of the Natural Environment Research Council (NERC); Engineering and Physical Sciences Research Council (EPSRC); India's Department of Science and Technology (DST) [NE/R003521/1, NERCDMP-686]; UK National Centre for Earth Observation; NERC [pml010007, pml010008, nceo020006, NE/R003521/1, p…	Rehabilitation of Vibrio-infested waters of Lake Vembanad (REVIVAL) project, India-UKWater Quality Initiative of the Natural Environment Research Council (NERC); Engineering and Physical Sciences Research Council (EPSRC)(UK Research & Innovation (UKRI)Engineering & Physical Sciences Research Council (EPSRC)); India's Department of Science and Technology (DST); UK National Centre for Earth Observa…	This research was funded by the Rehabilitation of Vibrio-infested waters of Lake Vembanad (REVIVAL) project, as part of the India-UKWater Quality Initiative of the Natural Environment Research Council (NERC) and the Engineering and Physical Sciences Research Council (EPSRC) in partnership with India's Department of Science and Technology (DST). Grant number NE/R003521/1 and NERCDMP-686. This work…		83	21	21	2	10	MDPI	BASEL	ST ALBAN-ANLAGE 66, CH-4052 BASEL, SWITZERLAND		1424-8220		SENSORS-BASEL	Sensors	2023-02-02	2019	19	4
J	Kurz, EEC; Luong, VT; Hellriegel, U; Leidinger, F; Luu, TL; Bundschuh, J; Hoinkis, J				Canas Kurz, Edgardo E.; Luong, Vu T.; Hellriegel, Ulrich; Leidinger, Felix; Luu, Tran L.; Bundschuh, Jochen; Hoinkis, Jan			Iron-based subsurface arsenic removal (SAR): Results of a long-term pilot-scale test in Vietnam	WATER RESEARCH			English	Article						Subsurface arsenic mitigation; Mekong delta; Oxidation/adsorption; Zero-waste; Low-cost; Groundwater contamination	DRINKING-WATER; WELL FIELD; RED-RIVER; GROUNDWATER; CONTAMINATION; REMEDIATION; TECHNOLOGIES; MOBILIZATION; POLLUTION; AMMONIUM	The principle of subsurface arsenic removal (SAR) from groundwater is based on oxidation and adsorption reactions by infiltrating oxygen into the anoxic aquifer and the immobilization of arsenic (As) onto freshly formed iron (Fe)-(hydr)oxides. In this study, a pilot-scale plant for SAR has been subject to long term testing in the Mekong Delta, Vietnam. Initial concentrations of Fe (8.4 +/- 1.3 mg…	[Canas Kurz, Edgardo E.; Hellriegel, Ulrich; Leidinger, Felix; Hoinkis, Jan] Karlsruhe Univ Appl Sci, Ctr Appl Res, Moltkestr 30, D-76133 Karlsruhe, Germany; [Canas Kurz, Edgardo E.; Hellriegel, Ulrich] Univ Calabria, Dept Chem & Chem Technol, Lab Ind & Synthet Organ Chem LISOC, Via Pietro Bucci 12-C, I-87036 Arcavacata Di Rende, CS, Italy; [Canas Kurz, Edgardo E.; Hellriegel, Ulrich] Natl Res Co…	Karlsruhe University of Applied Sciences; University of Calabria; Consiglio Nazionale delle Ricerche (CNR); Istituto per la Tecnologia delle Membrane (ITM-CNR); Vietnamese-German University; University of Southern Queensland; University of Southern Queensland	Hoinkis, J (corresponding author), Karlsruhe Univ Appl Sci, Ctr Appl Res, Moltkestr 30, D-76133 Karlsruhe, Germany.	jan.hoinkis@hs-karlsruhe.de		Luong, Tan Vu/0000-0003-3607-1401; Hellriegel, Ulrich/0000-0002-4522-023X	German Federal Ministry of Education and Research (BMBF) [02WAV1413]	German Federal Ministry of Education and Research (BMBF)(Federal Ministry of Education & Research (BMBF))	The project was funded by the German Federal Ministry of Education and Research (BMBF) from September 2016 to December 2019 under the grant number 02WAV1413.		73	17	18	5	63	PERGAMON-ELSEVIER SCIENCE LTD	OXFORD	THE BOULEVARD, LANGFORD LANE, KIDLINGTON, OXFORD OX5 1GB, ENGLAND	0043-1354	1879-2448		WATER RES	Water Res.	2023-08-15	2020	181
J	O'Connor, E; Smeaton, AF; O'Connor, NE; Regan, F				O'Connor, Edel; Smeaton, Alan F.; O'Connor, Noel E.; Regan, Fiona			A Neural Network Approach to Smarter Sensor Networks for Water Quality Monitoring	SENSORS			English	Article						multi-modal sensor networks; rainfall radar; chemical sensors; environmental monitoring; visual sensing	PREDICTION; ISSUES	Environmental monitoring is evolving towards large-scale and low-cost sensor networks operating reliability and autonomously over extended periods of time. Sophisticated analytical instrumentation such as chemo-bio sensors present inherent limitations because of the number of samples that they can take. In order to maximize their deployment lifetime, we propose the coordination of multiple hetero…	[O'Connor, Edel; Smeaton, Alan F.; O'Connor, Noel E.] Dublin City Univ, CLAR Ctr Sensor Web Technol, Dublin 9, Ireland; [O'Connor, Edel; Regan, Fiona] Dublin City Univ, MESTECH Marine & Environm Sensing Technol Hub, Dublin 9, Ireland	Dublin City University; Dublin City University	O'Connor, E (corresponding author), Dublin City Univ, CLAR Ctr Sensor Web Technol, Dublin 9, Ireland.	edel.oconnor@computing.dcu.ie; alan.smeaton@dcu.ie; noel.oconnor@dcu.ie; fiona.regan@dcu.ie	Regan, Fiona/O-4809-2018	O'Connor, Noel/0000-0002-4033-9135; Smeaton, Alan F./0000-0003-1028-8389	Dept. of Communications, Marine & Natural Resources under the Strategy for Science, Technology and Innovation; Science Foundation Ireland [07/CE/I1147]	Dept. of Communications, Marine & Natural Resources under the Strategy for Science, Technology and Innovation; Science Foundation Ireland(Science Foundation Ireland)	The presented work is based on research funded by the Dept. of Communications, Marine & Natural Resources under the Strategy for Science, Technology and Innovation (2006-2013) and by Science Foundation Ireland under grant number 07/CE/I1147.		43	17	17	0	29	MDPI	BASEL	ST ALBAN-ANLAGE 66, CH-4052 BASEL, SWITZERLAND		1424-8220		SENSORS-BASEL	Sensors	APR	2012	12	4
J	Bernalte, E; Arevalo, S; Perez-Taborda, J; Wenk, J; Estrela, P; Avila, A; Di Lorenzo, M				Bernalte, Elena; Arevalo, Sebastian; Perez-Taborda, Jaime; Wenk, Jannis; Estrela, Pedro; Avila, Alba; Di Lorenzo, Mirella			Rapid and on-site simultaneous electrochemical detection of copper, lead and mercury in the Amazon river	SENSORS AND ACTUATORS B-CHEMICAL			English	Article						Screen-printed electrodes; Electrochemical sensor; Heavy metals; Water; Amazon	ANODIC-STRIPPING VOLTAMMETRY; SCREEN-PRINTED ELECTRODES; HEAVY-METAL IONS; BRAZILIAN AMAZON; WATER; BASIN; NANOMATERIALS; ENVIRONMENT; CHALLENGES; SENSORS	In poor and remote zones of the world, such as the Amazon region, the lack of analytical infrastructures prevents regular quality assessments of water systems. The access to affordable, portable and robust analytical technologies for real-time and on-site water monitoring is, therefore, key to safeguard vulnerable communities and the environment. In this context, we have developed and successfull…	[Bernalte, Elena; Wenk, Jannis; Di Lorenzo, Mirella] Univ Bath, Dept Chem Engn, Bath BA2 7AY, Avon, England; [Bernalte, Elena; Wenk, Jannis; Estrela, Pedro; Di Lorenzo, Mirella] Univ Bath, Water Innovat & Res Ctr, Bath BA2 7AY, Avon, England; [Bernalte, Elena; Estrela, Pedro; Di Lorenzo, Mirella] Univ Bath, Ctr Biosensors Bioelect & Biodevices, Bath BA2 7AY, Avon, England; [Arevalo, Sebastian; Pe…	University of Bath; University of Bath; University of Bath; Universidad de los Andes (Colombia); Universidad de los Andes (Colombia); University of Bath	Bernalte, E; Di Lorenzo, M (corresponding author), Univ Bath, Dept Chem Engn, Bath BA2 7AY, Avon, England.	E.M.Bernalte.Morgado@bath.ac.uk; M.Di.Lorenzo@bath.ac.uk	Bernal, Alba G Avila/D-2263-2012; TABORDA, JAIME ANDRES PEREZ/O-2632-2013; Estrela, Pedro/B-5411-2008; Bernalte Morgado, Elena/L-4766-2014	Bernal, Alba G Avila/0000-0003-1241-2080; TABORDA, JAIME ANDRES PEREZ/0000-0002-5202-9708; Di Lorenzo, Mirella/0000-0002-1332-6347; Estrela, Pedro/0000-0001-6956-1146; Bernalte Morgado, Elena/0000-0002-0764-789X	British Council; Fondo Nacional de Financiamento para la Ciencia, la Technologia y la Innovacion 'Francisco Jose de Caldas', through a Newton Fund Institutional Links award [275475184]	British Council(The British Council in India); Fondo Nacional de Financiamento para la Ciencia, la Technologia y la Innovacion 'Francisco Jose de Caldas', through a Newton Fund Institutional Links award	This project was funded by the British Council and Fondo Nacional de Financiamento para la Ciencia, la Technologia y la Innovacion 'Francisco Jose de Caldas', through a Newton Fund Institutional Links award (ID275475184). The authors gratefully acknowledge the essential collaboration of the Indigenous Communities of Aguila and Santa Sofia in Amazon (Colombia), who have turned this work into a lif…		37	58	58	6	197	ELSEVIER SCIENCE SA	LAUSANNE	PO BOX 564, 1001 LAUSANNE, SWITZERLAND		0925-4005		SENSOR ACTUAT B-CHEM	Sens. Actuator B-Chem.	2023-03-15	2020	307
J	Dutta, S; Sarma, D; Nath, P				Dutta, Sibasish; Sarma, Dhrubajyoti; Nath, Pabitra			Ground and river water quality monitoring using a smartphone-based pH sensor	AIP ADVANCES			English	Article							PHONE; PHARMACEUTICALS; TEMPERATURE; MICROSCOPY; TOXICITY	We report here the working of a compact and handheld smartphone-based pH sensor for monitoring of ground and river water quality. Using simple laboratory optical components and the camera of the smartphone, we develop a compact spectrophotometer which is operational in the wavelength range of 400-700 nm and having spectral resolution of 0.305 nm/pixel for our equipment. The sensor measures variat…	[Dutta, Sibasish; Nath, Pabitra] Tezpur Univ, Dept Phys, Appl Photon & Nanophoton Lab, Tezpur 784028, Assam, India; [Sarma, Dhrubajyoti] Tezpur Univ, Dept Mol Biol & Biotechnol, Appl Biochem Lab, Tezpur 784028, Assam, India	Tezpur University; Tezpur University	Nath, P (corresponding author), Tezpur Univ, Dept Phys, Appl Photon & Nanophoton Lab, Tezpur 784028, Assam, India.	pnath@tezu.ernet.in		Sarma, Dhrubajyoti/0000-0003-3771-750X; dutta, sibasish/0000-0003-2710-4742; Nath, Pabitra/0000-0003-3768-076X					30	40	42	3	32	AMER INST PHYSICS	MELVILLE	1305 WALT WHITMAN RD, STE 300, MELVILLE, NY 11747-4501 USA	2158-3226			AIP ADV	AIP Adv.	MAY	2015	5	5
J	Maju, NAH; Mansor, H; Gunawan, TS; Ahmad, R				Maju, Nurulhasanah Amir Hamzah; Mansor, Hasmah; Gunawan, Teddy Surya; Ahmad, Robiah			THE DEVELOPMENT OF WATER POLLUTION DETECTOR USING CONDUCTIVITY AND TURBIDITY PRINCIPLES	IIUM ENGINEERING JOURNAL			English	Article						water pollution detector; conductivity; turbidity; ThingSpeak		Water pollution has caused negative impacts on human health as humans depend solely on water for drinking, cooking, and cleaning. Even more worrying is that the number of polluted rivers seems to increase as time progresses. Due to no real-time monitoring device being implemented, the authorities are unaware of any given river's real-time conditions. Therefore, this research aims to control the w…	[Maju, Nurulhasanah Amir Hamzah; Mansor, Hasmah; Gunawan, Teddy Surya] Int Islamic Univ Malaysia, Dept Elect & Comp Engn, POB 10, Kuala Lumpur 50728, Malaysia; [Ahmad, Robiah] Univ Teknol Malaysia, Razak Fac Technol & Informat, Jalan Sultan Yahya Petra, Kuala Lumpur 54100, Malaysia	International Islamic University Malaysia; Universiti Teknologi Malaysia	Mansor, H (corresponding author), Int Islamic Univ Malaysia, Dept Elect & Comp Engn, POB 10, Kuala Lumpur 50728, Malaysia.	hasmahm@iium.edu.my	Gunawan, Teddy S/E-9644-2011	Gunawan, Teddy S/0000-0003-3345-4669; Mansor, Hasmah/0000-0001-5794-2785; Ahmad, Robiah/0000-0001-6461-9564					9	1	1	6	8	KULLIYYAH ENGINEERING	JALAN GOMBAK	INT ISLAMIC UNIV MALAYSIA, JALAN GOMBAK, 53100, MALAYSIA	1511-788X	2289-7860		IIUM ENG J	IIUM Eng. J.	JUL	2022	23	2
J	Hjort, RG; Soares, RRA; Li, JZ; Jing, DP; Hartfiel, L; Chen, BL; Van Belle, B; Soupir, M; Smith, E; McLamore, E; Claussen, JC; Gomes, CL				Hjort, Robert G.; Soares, Raquel R. A.; Li, Jingzhe; Jing, Dapeng; Hartfiel, Lindsey; Chen, Bolin; Van Belle, Bryan; Soupir, Michelle; Smith, Emily; McLamore, Eric; Claussen, Jonathan C.; Gomes, Carmen L.			Hydrophobic laser-induced graphene potentiometric ion-selective electrodes for nitrate sensing	MICROCHIMICA ACTA			English	Article						Ion-selective electrodes (ISE); Solid contact; PVC membrane; Graphene; Potentiometry; Water quality; Agricultural nutrients	SOLID-CONTACT; POTENTIAL STABILITY; WATER-UPTAKE; FTIR-ATR; CARBON; SENSORS; DIFFUSION; MEMBRANE	Current solid-contact ion-selective electrodes (ISEs) suffer from signal-to-noise drift and short lifespans partly due to water uptake and the development of an aqueous layer between the transducer and ion-selective membrane. To address these challenges, we report on a nitrate ISE based on hydrophobic laser-induced graphene (LIG) coated with a poly(vinyl) chloride-based nitrate selective membrane…	[Hjort, Robert G.; Soares, Raquel R. A.; Chen, Bolin; Van Belle, Bryan; Claussen, Jonathan C.; Gomes, Carmen L.] Iowa State Univ, Dept Mech Engn, Ames, IA 50011 USA; [Li, Jingzhe; Smith, Emily] Iowa State Univ, Dept Chem, Ames, IA 50011 USA; [Li, Jingzhe; Smith, Emily] US DOE, Ames Lab, Ames, IA 50011 USA; [Jing, Dapeng] Iowa State Univ, Mat Anal & Res Lab, Ames, IA 50011 USA; [Hartfiel, Lindsey;…	Iowa State University; Iowa State University; United States Department of Energy (DOE); Ames National Laboratory; Iowa State University; Iowa State University; Clemson University	Gomes, CL (corresponding author), Iowa State Univ, Dept Mech Engn, Ames, IA 50011 USA.	ghjort@iastate.edu; raquel20@iastate.edu; jzli@iastate.edu; djing@iastate.edu; lmurry@iastate.edu; bolin@iastate.edu; brynvnbl@iastate.edu; msoupir@iastate.edu; esmithl@iastate.edu; emclamo@clemson.edu; jcclauss@iastate.edu; carmen@iastate.edu	; Jing, Dapeng/M-3455-2014	Li, Jingzhe/0000-0002-1856-1477; Van Belle, Bryan/0000-0002-9081-4336; Smith, Emily/0000-0001-7438-7808; Soupir, Michelle/0000-0003-3449-1146; Hjort, Robert Gage/0000-0003-2400-0710; McLamore, Eric/0000-0002-1662-7372; Jing, Dapeng/0000-0001-7600-7071; Hartfiel, Lindsey/0000-0002-1083-3888	National Institute of Food and Agriculture; U.S. Department of Agriculture [2019-05855, 2020-04109, 2018-672-6701627578]; National Science Foundation [CBET-1706994, CBET-1756999, CBET1805512, ECCS-1841649, CMMI-2037026]	National Institute of Food and Agriculture(United States Department of Agriculture (USDA)National Institute of Food and Agriculture); U.S. Department of Agriculture(United States Department of Agriculture (USDA)); National Science Foundation(National Science Foundation (NSF))	We gratefully acknowledge funding support from the National Institute of Food and Agriculture, U.S. Department of Agriculture, award numbers 2019-05855, 2020-04109, and 2018-672-6701627578 awarded as a Center of Excellence. The National Science Foundation under award numbers CBET-1706994, CBET-1756999, CBET1805512, ECCS-1841649, and CMMI-2037026. We also gratefully acknowledge Leigh Ann Long and …		61	2	2	9	34	SPRINGER WIEN	WIEN	SACHSENPLATZ 4-6, PO BOX 89, A-1201 WIEN, AUSTRIA	0026-3672	1436-5073		MICROCHIM ACTA	Microchim. Acta	MAR	2022	189	3
J	Li, WK; Tian, LQ; Guo, SS; Li, J; Sun, ZH; Zhang, L				Li, Wenkai; Tian, Liqiao; Guo, Shanshan; Li, Jian; Sun, Zhaohua; Zhang, Li			An Automatic Stationary Water Color Parameters Observation System for Shallow Waters: Designment and Applications	SENSORS			English	Article						Water-leaving reflectance; above-water method; automatic sun-tracking platform; water color parameters; wireless transmission	REMOTE-SENSING REFLECTANCE; POYANG LAKE; ABOVE-WATER; SUSPENDED SEDIMENT; MODIS; DYNAMICS; CLARITY; MATTER; IMAGES	Measurements of the above-water spectrum and concerned water color parameters (WCPs) are crucial for research and applications in water environment remote sensing. Due to the lack of system integration and automatization, conventional methods are labor-intensive, time-consuming, and prone to subjective influences. To obtain a highly accurate and long-term consistent spectrum and concurrent WCPs (…	[Li, Wenkai; Tian, Liqiao; Zhang, Li] Wuhan Univ, State Key Lab Informat Engn Surveying Mapping & R, Wuhan 430079, Hubei, Peoples R China; [Guo, Shanshan] Second Design & Res Inst Water Conservancy Hydrop, Shijiazhuang 50021, Hebei, Peoples R China; [Li, Jian] Wuhan Univ, Sch Remote Sensing & Informat Engn, Wuhan 430079, Hubei, Peoples R China; [Sun, Zhaohua] Chinese Acad Sci, South China Sea Ins…	Wuhan University; Wuhan University; Chinese Academy of Sciences; South China Sea Institute of Oceanology, CAS	Li, J (corresponding author), Wuhan Univ, Sch Remote Sensing & Informat Engn, Wuhan 430079, Hubei, Peoples R China.	liwenkai@whu.edu.cn; tianliqiao@whu.edu.cn; whuguoshanshan@163.com; lijian@whu.edu.cn; Joeysun@scsio.ac.cn; zhanglinu@126.com		Li, Wenkai/0000-0003-1286-9427	National Key R&D Program of China [2018YFB0504900, 2018YFB0504904]; National Natural Science Foundation of China [41571344, 41701379, 41331174, 41071261, 40906092, 40971193, 41101415, 41401388, 41206169]; China Postdoctoral Science Foundation; program of Key Laboratory for National Geographic Census and Monitoring, National Administration of Surveying, Mapping and Geoinformation [2014NGCM]; Natur…	National Key R&D Program of China; National Natural Science Foundation of China(National Natural Science Foundation of China (NSFC)); China Postdoctoral Science Foundation(China Postdoctoral Science Foundation); program of Key Laboratory for National Geographic Census and Monitoring, National Administration of Surveying, Mapping and Geoinformation; Natural Science Foundation of Jiangxi, China(Nat…	This research was funded by the National Key R&D Program of China (grants 2018YFB0504900 and 2018YFB0504904), the National Natural Science Foundation of China (Nos. 41571344,41701379, 41331174, 41071261, 40906092, 40971193, 41101415, 41401388, and 41206169), the China Postdoctoral Science Foundation, the program of Key Laboratory for National Geographic Census and Monitoring, National Administrat…		27	1	1	0	9	MDPI	BASEL	ST ALBAN-ANLAGE 66, CH-4052 BASEL, SWITZERLAND		1424-8220		SENSORS-BASEL	Sensors	2023-10-02	2019	19	20
J	Bommireddy, N; Palathedath, SK				Bommireddy, Naveen; Palathedath, Suresh Kumar			Templated bimetallic copper-silver nanostructures on pencil graphite for amperometric detection of nitrate for aquatic monitoring	JOURNAL OF ELECTROANALYTICAL CHEMISTRY			English	Article						Copper-silver bimetallic nanostructures; Water pollution; Nitrate sensor; Chronoamperometry	CORE-SHELL NANOPARTICLES; ION-SELECTIVE ELECTRODE; ELECTROCHEMICAL SENSOR; DRINKING-WATER; NITRITE; REDUCTION; LIQUID; CHROMATOGRAPHY	High concentrations of nitrogen compounds, phosphates and silicates in domestic water leads to confronting affects and are significant contributors to water pollution. As a result, continuous monitoring of these dissolved ions is essential for maintaining fresh water resources and to provide a balanced ecosystem. Among the contaminants, nitrate is one of the most-contributing pollutants in indust…	[Bommireddy, Naveen; Palathedath, Suresh Kumar] SASTRA Deemed Univ, Sch Chem & Biotechnol, Dept Chem, Thanjavur 613401, Tamil Nadu, India	Shanmugha Arts, Science, Technology & Research Academy (SASTRA)	Palathedath, SK (corresponding author), SASTRA Deemed Univ, Sch Chem & Biotechnol, Dept Chem, Thanjavur 613401, Tamil Nadu, India.	suresh@scbt.sastra.edu	Bommireddy, Naveen/AAT-9042-2020; Palathedath, Suresh Kumar/X-2410-2018	Bommireddy, Naveen/0000-0002-4919-709X; Palathedath, Suresh Kumar/0000-0003-1328-8907	Department of Science and Technology, Govt. of India through Young Scientist Initiative programme [S13/FT/CS-148/2013]; Water Technology Initiative program [WTI/2K16/215]	Department of Science and Technology, Govt. of India through Young Scientist Initiative programme(Department of Science & Technology (India)); Water Technology Initiative program	PSK thanks financial support from Department of Science and Technology, Govt. of India through Young Scientist Initiative programme (S13/FT/CS-148/2013) and Water Technology Initiative program (WTI/2K16/215).		45	9	9	0	22	ELSEVIER SCIENCE SA	LAUSANNE	PO BOX 564, 1001 LAUSANNE, SWITZERLAND	1572-6657	1873-2569		J ELECTROANAL CHEM	J. Electroanal. Chem.	2023-01-01	2020	856
J	Guo, XM; Chen, PH; Jiang, HL; Tang, XQ; Huang, YP; Wu, GH; Zhang, J				Guo, Xiaomin; Chen, Pinghua; Jiang, Hualin; Tang, Xiaoqiu; Huang, Yiping; Wu, Guanghui; Zhang, Jian			Sensitive, Selective and Simultaneous Monitor of Multiple Heavy Metals in Environment Using a Low-Cost MIL-53(Fe)/Ag2CrO4 Modified GCE Sensor	JOURNAL OF THE ELECTROCHEMICAL SOCIETY			English	Article							ELECTROCHEMICAL DETECTION; ORGANIC FRAMEWORK; PB2+; NANOCOMPOSITE; PERFORMANCE; OXIDASE; CO2	Due to the strong toxicity of heavy metal ions to public health and the environment, it is a great challenge to develop a method for ultra sensitive capture and determination of heavy metal ions effectively. Herein, a novel heterostructure composite (MIL-53(Fe)/Ag2CrO4, named MA(1:x)) was prepared by a simple method successfully. MA(1:x) modified GCE was applied to detect heavy metals ions simult…	[Guo, Xiaomin; Chen, Pinghua; Jiang, Hualin; Tang, Xiaoqiu; Huang, Yiping] Key Lab Jiangxi Prov Persistent Pollutants Contro, Nanchang 330063, Jiangxi, Peoples R China; [Guo, Xiaomin; Chen, Pinghua; Jiang, Hualin; Tang, Xiaoqiu; Huang, Yiping] Natl Local Joint Engn Res Ctr Heavy Met Pollutant, Nanchang 330063, Jiangxi, Peoples R China; [Guo, Xiaomin; Chen, Pinghua; Jiang, Hualin; Tang, Xiaoqiu; H…	Nanchang Hangkong University	Chen, PH; Jiang, HL (corresponding author), Key Lab Jiangxi Prov Persistent Pollutants Contro, Nanchang 330063, Jiangxi, Peoples R China.;Chen, PH; Jiang, HL (corresponding author), Natl Local Joint Engn Res Ctr Heavy Met Pollutant, Nanchang 330063, Jiangxi, Peoples R China.;Chen, PH; Jiang, HL (corresponding author), Nanchang Hangkong Univ, Dept Environm & Chem Engn, Nanchang 330063, Jiangxi, Pe…	cph1979@126.com; hua20022000@126.com		Chen, Pinghua/0000-0003-2738-1723	National Natural Science Foundation of China [42077162, 51978323]; Natural Science Foundation of Jiangxi Province [20203BBGL73229]; Major Discipline Academic and Technical Leaders Training Program of Jiangxi Province [20213BCJ22018]; Nanchang Hangkong University Educational Reform Project [sz2153, KCPY1806]; High level undergraduate teaching team in Jiangxi Province in 2022 (Chemistry first-class…	National Natural Science Foundation of China(National Natural Science Foundation of China (NSFC)); Natural Science Foundation of Jiangxi Province(Natural Science Foundation of Jiangxi Province); Major Discipline Academic and Technical Leaders Training Program of Jiangxi Province; Nanchang Hangkong University Educational Reform Project; High level undergraduate teaching team in Jiangxi Province in…	The authors would like to acknowledge the National Natural Science Foundation of China (42077162, 51978323), Natural Science Foundation of Jiangxi Province (20203BBGL73229), Major Discipline Academic and Technical Leaders Training Program of Jiangxi Province (20213BCJ22018), Nanchang Hangkong University Educational Reform Project (sz2153, KCPY1806), High level undergraduate teaching team in Jiang…		52	0	0	3	7	ELECTROCHEMICAL SOC INC	PENNINGTON	65 SOUTH MAIN STREET, PENNINGTON, NJ 08534 USA	0013-4651	1945-7111		J ELECTROCHEM SOC	J. Electrochem. Soc.	2023-09-01	2022	169	9
J	Rai, PK; Islam, M; Gupta, A				Rai, Prince Kumar; Islam, Monsur; Gupta, Ankur			Microfluidic devices for the detection of contamination in water samples: A review	SENSORS AND ACTUATORS A-PHYSICAL			English	Review						Water contamination; Heavy metals; Pharmaceutical waste; Microfluidic device; Detection schemes	ON-A-CHIP; SOLID-PHASE EXTRACTION; HEAVY-METAL; ELECTROCHEMICAL SENSOR; LOW-COST; COLORIMETRIC DETERMINATION; ESCHERICHIA-COLI; CARBON NANOTUBES; ARSENIC TOXICITY; DRINKING-WATER	Being a burgeoning environmental problem, water pollution becomes a worldwide apprehension due to the inadequate accessibility of fresh water. Heavy metals, pharmaceuticals waste, organic, and inorganic contami-nants present in wastewater have shown significant threats to the environment and public health globally. Currently available monitoring techniques involve complex equipment, longer proces…	[Rai, Prince Kumar; Gupta, Ankur] Indian Inst Technol Jodhpur, Dept Mech Engn, Jodhpur 342037, India; [Islam, Monsur] Karlsruhe Inst Technol, Inst Microstruct Technol, Karlsruhe, Germany	Indian Institute of Technology System (IIT System); Indian Institute of Technology (IIT) - Jodhpur; Helmholtz Association; Karlsruhe Institute of Technology	Gupta, A (corresponding author), Indian Inst Technol Jodhpur, Dept Mech Engn, Jodhpur 342037, India.	ankurgupta@iitj.ac.in			Science and Engineering Research Board, Department of Science and Technology, India [SRG/2020/001895, SIR/2022/000188]	Science and Engineering Research Board, Department of Science and Technology, India	The corresponding author wishes to acknowledge the Startup Research Grant (SRG/2020/001895) and SERB International Research Experience fellowship (SIR/2022/000188) provided by Science and Engineering Research Board, Department of Science and Technology, India.		177	6	6	25	25	ELSEVIER SCIENCE SA	LAUSANNE	PO BOX 564, 1001 LAUSANNE, SWITZERLAND	0924-4247	1873-3069		SENSOR ACTUAT A-PHYS	Sens. Actuator A-Phys.	2023-11-01	2022	347
J	Kordasht, HK; Hassanpour, S; Baradaran, B; Nosrati, R; Hashemzaei, M; Mokhtarzadeh, A; de la Guardia, M				Kordasht, Houman Kholafazad; Hassanpour, Soodabeh; Baradaran, Behzad; Nosrati, Rahim; Hashemzaei, Mahmoud; Mokhtarzadeh, Ahad; de la Guardia, Miguel			Biosensing of microcystins in water samples; recent advances	BIOSENSORS & BIOELECTRONICS			English	Article						Water contamination; Microcystin; Cyanotoxin; Biosensor; Human health; Food; Marine toxin	CARBON NANOFIBERS; FRESH-WATER; ULTRASENSITIVE DETECTION; CYANOBACTERIAL TOXINS; SIGNAL AMPLIFICATION; CONDUCTING POLYMERS; RAPID DETECTION; LR DETECTION; IMMUNOSENSOR; GRAPHENE	Safety and quality of water are significant matters for agriculture, animals and human health. Microcystins, as secondary metabolite of cyanobacteria (blue-green algae) and cyclic heptapeptide cyanotoxin, are one of the main marine toxins in continental aquatic ecosystems. More than 100 microcystins have been identified, of which MC-LR is the most important type due to its high toxicity and commo…	[Kordasht, Houman Kholafazad] Univ Tabriz, Fac Vet Med, Dept Food Hyg & Aquat, Tabriz, Iran; [Hassanpour, Soodabeh] Palacky Univ Olomouc, Fac Sci, Dept Analyt Chem, 17 Listopadu 12, Olomouc 77146, Czech Republic; [Baradaran, Behzad; Mokhtarzadeh, Ahad] Tabriz Univ Med Sci, Immunol Res Ctr, Tabriz, Iran; [Nosrati, Rahim] Mashhad Univ Med Sci, Sch Pharm, Dept Pharmaceut Biotechnol, Mashhad, Razavi …	University of Tabriz; Palacky University Olomouc; Tabriz University of Medical Science; Mashhad University Medical Science; University of Valencia	Mokhtarzadeh, A (corresponding author), Tabriz Univ Med Sci, Immunol Res Ctr, Tabriz, Iran.;de la Guardia, M (corresponding author), Univ Valencia, Dept Analyt Chem, Dr Moliner 50, Valencia 46100, Spain.	mokhtarzadehah@tbzmed.ac.ir; miguel.delaguardia@uv.es	Nosrati, Rahim/ABA-5825-2020; Baradaran, Behzad/AAQ-5177-2020; khordasht, Houman kholafazad/AAB-4325-2019; Nosrati, Rahim/GXZ-6616-2022; nosrati, rahim/GXH-8721-2022	Nosrati, Rahim/0000-0001-9734-6400; Baradaran, Behzad/0000-0002-8642-6795; Nosrati, Rahim/0000-0001-9734-6400; HASSANPOUR, Soodabeh/0000-0003-4759-0530	Immunology Research Center, Tabriz University of Medical Sciences	Immunology Research Center, Tabriz University of Medical Sciences	The authors are grateful for financial support from the Immunology Research Center, Tabriz University of Medical Sciences.		134	36	36	19	160	ELSEVIER ADVANCED TECHNOLOGY	OXFORD	OXFORD FULFILLMENT CENTRE THE BOULEVARD, LANGFORD LANE, KIDLINGTON, OXFORD OX5 1GB, OXON, ENGLAND	0956-5663	1873-4235		BIOSENS BIOELECTRON	Biosens. Bioelectron.	2023-10-01	2020	165
J	Makarov, M; Aslamov, I; Gnatovsky, R				Makarov, Mikhail; Aslamov, Ilya; Gnatovsky, Ruslan			Environmental Monitoring of the Littoral Zone of Lake Baikal Using a Network of Automatic Hydro-Meteorological Stations: Development and Trial Run	SENSORS			English	Article						Lake Baikal; water quality; sensors; ecological monitoring; data management	WATER-QUALITY; SYSTEM; VARIABILITY	An automatic hydro-meteorological station (AHMS) was designed to monitor the littoral zone of Lake Baikal in areas with high anthropogenic pressure. The developed AHMS was installed near the Bolshiye Koty settlement (southern basin). This AHMS is the first experience focused on obtaining the necessary competencies for the development of a monitoring network of the Baikal natural territory. To inc…	[Makarov, Mikhail; Aslamov, Ilya; Gnatovsky, Ruslan] Russian Acad Sci, Limnol Inst, Siberian Branch, Irkutsk 664033, Russia	Irkutsk Science Centre of the Russian Academy of Sciences; Russian Academy of Sciences; Limnological Institute SB RAS	Makarov, M (corresponding author), Russian Acad Sci, Limnol Inst, Siberian Branch, Irkutsk 664033, Russia.	mmmsoft@hlserver.lin.irk.ru; ilya_aslamov@bk.ru; gnat@lin.irk.ru	Makarov, Mikhail/J-4851-2018	Makarov, Mikhail/0000-0002-1758-4458; Aslamov, Ilya/0000-0001-6678-5312	Ministry of Science and Higher Education of the Russian Federation [075-15-2020-787]; LIN SB RAS	Ministry of Science and Higher Education of the Russian Federation; LIN SB RAS	We are grateful to the team of divers headed by Igor Khanaev for their help in laying the pipe and organizing the water intake. We also thank the staff of the Laboratory of Hydrochemistry and Atmosphere Chemistry of LIN SB RAS for conducting parallel laboratory measurements. We are very much obliged to Julia Vitushenko for valuable help with translating and improving the text. We are thankful to …		47	1	1	1	3	MDPI	BASEL	ST ALBAN-ANLAGE 66, CH-4052 BASEL, SWITZERLAND		1424-8220		SENSORS-BASEL	Sensors	NOV	2021	21	22
J	Coutinho, RM; Sousa, A; Santos, F; Cunha, M				Coutinho, Rui M.; Sousa, Armando; Santos, Filipe; Cunha, Mario			Contactless Soil Moisture Mapping Using Inexpensive Frequency-Modulated Continuous Wave RADAR for Agricultural Purposes	APPLIED SCIENCES-BASEL			English	Article						soil moisture; RADAR; FMCW; non-invasive; capacitive sensing; precision agriculture; surface water content	GROUND-PENETRATING RADAR; ELECTROMAGNETIC INDUCTION	Soil Moisture (SM) is one of the most critical factors for a crop's growth, yield, and quality. Although Ground-Penetrating RADAR (GPR) is commonly used in satelite observation to analyze soil moisture, it is not cost-effective for agricultural applications. Automotive RADAR uses the concept of Frequency-Modulated Continuous Wave (FMCW) and is more competitive in terms of price. This paper evalua…	[Coutinho, Rui M.; Sousa, Armando; Santos, Filipe; Cunha, Mario] INESC TEC Inst Syst & Comp Engn Technol & Sci, P-4200465 Porto, Portugal; [Coutinho, Rui M.; Sousa, Armando] Univ Porto, FEUP Fac Engn, P-4200465 Porto, Portugal; [Cunha, Mario] Univ Porto, FCUP Fac Sci, P-4169007 Porto, Portugal	INESC TEC; Universidade do Porto; Universidade do Porto	Coutinho, RM (corresponding author), INESC TEC Inst Syst & Comp Engn Technol & Sci, P-4200465 Porto, Portugal.;Coutinho, RM (corresponding author), Univ Porto, FEUP Fac Engn, P-4200465 Porto, Portugal.	ruimpcoutinho@gmail.com; asousa@fe.up.pt; filipe.n.santos@inesctec.pt; mccunha@fc.up.pt	Coutinho, Rui/IUO-3478-2023; Sousa, Armando/IUN-2465-2023; Baptista Neves dos Santos, Filipe/J-2662-2015	Coutinho, Rui M./0000-0001-8821-2224; Baptista Neves dos Santos, Filipe/0000-0002-8486-6113; Sousa, Armando/0000-0002-0317-4714; Cunha, Mario/0000-0002-8299-324X	ERDF-European Regional Development Fund, through the Operational Programme for Competitiveness and Internationalisation-COMPETE 2020 Programme under the Portugal 2020 Partnership Agreement within project Replant, [POCI-01-0247-FEDER-046081]	ERDF-European Regional Development Fund, through the Operational Programme for Competitiveness and Internationalisation-COMPETE 2020 Programme under the Portugal 2020 Partnership Agreement within project Replant,	This work is financed by the ERDF-European Regional Development Fund, through the Operational Programme for Competitiveness and Internationalisation-COMPETE 2020 Programme under the Portugal 2020 Partnership Agreement within project Replant, with reference POCI-01-0247-FEDER-046081.		48	1	1	2	4	MDPI	BASEL	ST ALBAN-ANLAGE 66, CH-4052 BASEL, SWITZERLAND		2076-3417		APPL SCI-BASEL	Appl. Sci.-Basel	JUN	2022	12	11
J	Ying, HT; Xia, K; Huang, XX; Feng, HL; Yang, YH; Du, XC; Huang, LJ				Ying, Hanting; Xia, Kai; Huang, Xinxi; Feng, Hailin; Yang, Yinhui; Du, Xiaochen; Huang, Leijun			Evaluation of water quality based on UAV images and the IMP-MPP algorithm	ECOLOGICAL INFORMATICS			English	Article						Unmanned aerial vehicle; Multispectral; Suspended solids concentration; Turbidity; IMP-MPP algorithm	AERIAL VEHICLE UAV; MIHARU DAM-RESERVOIR; INLAND WATERS; PARAMETERS; REFLECTANCE; TURBIDITY; SENSORS; MODELS	In recent years, UAV remote sensing has been used to estimate water quality parameters, such as suspended solids (SS), turbidity (TUB), and chlorophyll-a (chl-a) levels, due to its low cost, convenience, and high resolution. The matching pixel-by-pixel (MPP) algorithm is one of the methods to find the optimal regression equation for retrieving water quality parameters from UAV images. However, MP…	[Ying, Hanting; Xia, Kai; Huang, Xinxi; Feng, Hailin; Yang, Yinhui; Du, Xiaochen; Huang, Leijun] Zhejiang A&F Univ, Sch Informat Engn, Hangzhou 311300, Peoples R China; [Ying, Hanting; Xia, Kai; Huang, Xinxi; Feng, Hailin; Yang, Yinhui; Du, Xiaochen; Huang, Leijun] Zhejiang Prov Key Lab Forestry Intelligent Monito, Hangzhou 311300, Peoples R China; [Ying, Hanting; Xia, Kai; Huang, Xinxi; Feng, Ha…	Zhejiang A&F University	Xia, K (corresponding author), Zhejiang A&F Univ, Sch Informat Engn, Hangzhou 311300, Peoples R China.	xiakai@zafu.edu.cn			Zhejiang Provincial Public Welfare Technology Research Projects [LGF21F020005]; Joint Fund of Zhejiang Provincial Natural Science Foundation of ChinaQingshanhu Science and Technology City [LQY18C160002]; Zhejiang Provincial Science and Technology Key RD Program [2015C03008]	Zhejiang Provincial Public Welfare Technology Research Projects; Joint Fund of Zhejiang Provincial Natural Science Foundation of ChinaQingshanhu Science and Technology City; Zhejiang Provincial Science and Technology Key RD Program	This work was jointly supported by Zhejiang Provincial Public Welfare Technology Research Projects [grant number LGF21F020005] , Joint Fund of Zhejiang Provincial Natural Science Foundation of ChinaQingshanhu Science and Technology City [grant number LQY18C160002] , and Zhejiang Provincial Science and Technology Key R&D Program [grant number 2015C03008] . In addition, we would like to thank the O…		42	10	10	1	26	ELSEVIER	AMSTERDAM	RADARWEG 29, 1043 NX AMSTERDAM, NETHERLANDS	1574-9541	1878-0512		ECOL INFORM	Ecol. Inform.	MAR	2021	61
J	Letsoalo, MR; Sithole, T; Mufamadi, S; Mazhandu, Z; Sillanpaa, M; Kaushik, A; Mashifana, T				Letsoalo, Mokgehle R.; Sithole, Thandiwe; Mufamadi, Steven; Mazhandu, Zvanaka; Sillanpaa, Mika; Kaushik, Ajeet; Mashifana, Tebogo			Efficient detection and treatment of pharmaceutical contaminants to produce clean water for better health and environmental	JOURNAL OF CLEANER PRODUCTION			English	Review						Pharmaceutical contaminants; Water quality; Nanotechnology; Sensors; Catalysis; Health & environmental management	PERSONAL CARE PRODUCTS; WASTE-WATER; ACTIVATED CARBON; AQUEOUS-SOLUTION; EMERGING CONTAMINANTS; LIQUID-CHROMATOGRAPHY; ORGANIC CONTAMINANTS; AQUATIC-ENVIRONMENT; STEROID-HORMONES; TREATMENT PLANTS	The influx of emerging, prescribed, and FDA approved pharmaceutical contaminants (PCs) in the environment is continuously affecting human health and human cycle (even at trace amount) via contaminating water and aquatic life. Among them, non-degradable water-soluble residues which have been integrated with water streams and groundwater is a serious concern and is now a focus of United Nation's Su…	[Letsoalo, Mokgehle R.; Sithole, Thandiwe; Mazhandu, Zvanaka; Sillanpaa, Mika; Kaushik, Ajeet; Mashifana, Tebogo] Univ Johannesburg, Dept Chem Engn Technol, POB 17011, ZA-2088 Doornfontein, South Africa; [Mufamadi, Steven] Nelson Mandela Univ, Med Sch, DSI Mandela Nanomed Platform, ZA-6059 Port Elizabeth, South Africa; [Kaushik, Ajeet] Florida Polytech Univ, Dept Environm Engn, NanoBioTech Lab, L…	University of Johannesburg; Nelson Mandela University; Florida Polytechnical University; University of Petroleum & Energy Studies (UPES)	Mashifana, T (corresponding author), Univ Johannesburg, Dept Chem Engn Technol, POB 17011, ZA-2088 Doornfontein, South Africa.	tmashifana@uj.ac.za	; Mashifana, Tebogo/E-6258-2019; Kaushik, Ajeet/K-1289-2018; Sillanpaa, Mika/G-1366-2011	Mazhandu, ZVANAKA/0000-0001-7296-8174; Mashifana, Tebogo/0000-0001-6129-8013; Mufamadi, Maluta Steven/0000-0002-2112-7137; Kaushik, Ajeet/0000-0003-4206-1541; Sithole, Nastassia Thandiwe/0000-0002-0075-4238; Sillanpaa, Mika/0000-0003-3247-5337					150	2	2	10	10	ELSEVIER SCI LTD	OXFORD	THE BOULEVARD, LANGFORD LANE, KIDLINGTON, OXFORD OX5 1GB, OXON, ENGLAND	0959-6526	1879-1786		J CLEAN PROD	J. Clean Prod.	2023-02-10	2023	387
J	Chen, J; Li, DL; Du, SF; Wei, YG; Tai, HJ				Chen, Ji; Li, Daoliang; Du, Shangfeng; Wei, Yaoguang; Tai, Haijiang			A Wireless Sensor Network Based Water Temperature Stratification Monitoring System for Aquaculture of Sea Cucumber	SENSOR LETTERS			English	Article						Sea Cucumber; WSN; Zigbee; GPRS; Water Temperature Monitoring	QUALITY; DESIGN	The different rise speed of water temperature and air temperature in spring and summer will form water temperature stratification in aquaculture pond which causes sea cucumber suffering or even dead. In view of the large area of aquaculture farm and difficulty of wiring, this paper develops a water temperature stratification monitoring system with low power consumption, low cost and full wireless…	[Chen, Ji; Li, Daoliang; Du, Shangfeng; Wei, Yaoguang; Tai, Haijiang] China Agr Univ, Coll Informat & Elect Engn, Beijing 100083, Peoples R China	China Agricultural University	Li, DL (corresponding author), China Agr Univ, Coll Informat & Elect Engn, Beijing 100083, Peoples R China.	dliangl@cau.edu.cn							14	7	8	1	28	AMER SCIENTIFIC PUBLISHERS	VALENCIA	26650 THE OLD RD, STE 208, VALENCIA, CA 91381-0751 USA	1546-198X	1546-1971		SENSOR LETT	Sens. Lett.	JUN	2011	9	3
J	Hadjimitsis, DG; Clayton, CRI; Toulios, L				Hadjimitsis, D. G.; Clayton, C. R. I.; Toulios, L.			A new method for assessing the trophic state of large dams in Cyprus using satellite remotely sensed data	WATER AND ENVIRONMENT JOURNAL			English	Article						dam; eutrophic; Landsat Thematic Mapper; remote sensing; spectro-radiometer; trophic state; water quality	WATER-QUALITY; LANDSAT TM; THEMATIC MAPPER; CHLOROPHYLL-A; LAKES; QUANTIFICATION	A timely low-cost method providing information on water quality and trophic state to various users of reservoir or dam water is a must. Conventional methods involved tedious and expensive in situ and laboratory studies. Satellite-borne sensors have the capability of providing repetitive, low-cost, multispectra, timely and reliable information over areas. This paper shows the development of a new …	[Hadjimitsis, D. G.] Cyprus Univ Technol, Dept Civil Engn & Geomat, Remote Sensing Lab, CY-3036 Lemesos, Cyprus; [Clayton, C. R. I.] Univ Southampton, Sch Civil Engn & Environm, Southampton, Hants, England; [Toulios, L.] Natl Agr Res Fdn NAGREF, Larisa, Greece	Cyprus University of Technology; RLUK- Research Libraries UK; University of Southampton	Hadjimitsis, DG (corresponding author), Cyprus Univ Technol, Dept Civil Engn & Geomat, Remote Sensing Lab, 31 Archbishop Kyprianos,Limassol Savings Cooperat, CY-3036 Lemesos, Cyprus.	d.hadjimitsis@cut.ac.cy	Hadjimitsis, Diofantos/H-8813-2013	Hadjimitsis, Diofantos/0000-0002-2684-547X; Clayton, Christopher Robert Ian/0000-0003-0071-8437	Remote Sensing Laboratory of the Department of Civil Engineering Geomatics	Remote Sensing Laboratory of the Department of Civil Engineering Geomatics	We are grateful to the personnel of the Water Development Department (Ministry of Agriculture and Natural Resources in Cyprus) in Paphos and Lemesos for their assistance. The authors acknowledge the support of the Remote Sensing Laboratory of the Department of Civil Engineering & Geomatics (Cyprus University of Technology http://www.cut.ac.cy).		45	8	8	0	16	WILEY	HOBOKEN	111 RIVER ST, HOBOKEN 07030-5774, NJ USA	1747-6585	1747-6593		WATER ENVIRON J	Water Environ. J.	SEP	2010	24	3
J	Ma, DK; Ding, QS; Li, ZB; Li, DL; Wei, YG				Ma, Daokun; Ding, Qisheng; Li, Zhenbo; Li, Daoliang; Wei, Yaoguang			PROTOTYPE OF AN AQUACULTURAL INFORMATION SYSTEM BASED ON INTERNET OF THINGS E-NOSE	INTELLIGENT AUTOMATION AND SOFT COMPUTING			English	Article						aquaculture information system; water quality measurement; wireless sensor and actuator network; internet of things	WATER-QUALITY; DESIGN	Aquaculture is the fastest growing food-producing sector in the World, especially, in P. R. China. In the ongoing process of Internet growth, a new development is on its way, namely the evolution from a network of interconnected computers to a network of interconnected objects that is called the Internet of Things (IoT). Constructing an affordable, easy-to-use, aquaculture information system base…	[Ma, Daokun; Ding, Qisheng; Li, Zhenbo; Li, Daoliang; Wei, Yaoguang] China Agr Univ, Coll Informat & Elect Engn, Beijing 100083, Peoples R China; [Ding, Qisheng] Xuzhou Normal Univ, Sch Elect Engn & Automat, Xuzhou 221116, Peoples R China	China Agricultural University; Jiangsu Normal University	Li, DL (corresponding author), China Agr Univ, Coll Informat & Elect Engn, Beijing 100083, Peoples R China.	Li_DaoLiang@yahoo.com		Li, Zhenbo/0000-0003-2914-1192					14	8	9	0	54	TAYLOR & FRANCIS LTD	ABINGDON	2-4 PARK SQUARE, MILTON PARK, ABINGDON OR14 4RN, OXON, ENGLAND	1079-8587	2326-005X		INTELL AUTOM SOFT CO	Intell. Autom. Soft Comput.		2012	18	5
J	Khandelwal, A; Gonzalez-Pinzon, R; Regier, P; Nichols, J; Van Horn, DJ				Khandelwal, Aashish; Gonzalez-Pinzon, Ricardo; Regier, Peter; Nichols, Justin; Van Horn, David J.			Introducing theSelf-Cleaning FiLtrAtionforWater quaLity SenSors(SC-FLAWLeSS) system	LIMNOLOGY AND OCEANOGRAPHY-METHODS			English	Article							WATER-QUALITY; INORGANIC NITROGEN; PHOSPHORUS UPTAKE; SENSORS; FLUORESCENCE; TURBIDITY; NITRATE; RIVERS; TEMPERATURE; DYNAMICS	Sensor-based, semicontinuous observations of water quality parameters have become critical to understanding how changes in land use, management, and rainfall-runoff processes impact water quality at diurnal to multidecadal scales. While some commercially available water quality sensors function adequately under a range of turbidity conditions, other instruments, including those used to measure nu…	[Khandelwal, Aashish; Gonzalez-Pinzon, Ricardo; Regier, Peter; Nichols, Justin] Univ New Mexico, Dept Civil Construct & Environm Engn, Albuquerque, NM 87131 USA; [Van Horn, David J.] Univ New Mexico, Dept Biol, Albuquerque, NM 87131 USA	University of New Mexico; University of New Mexico	Gonzalez-Pinzon, R (corresponding author), Univ New Mexico, Dept Civil Construct & Environm Engn, Albuquerque, NM 87131 USA.	gonzaric@unm.edu	González-Pinzón, Ricardo/A-6877-2011	González-Pinzón, Ricardo/0000-0001-9387-6885; Regier, Peter/0000-0002-8375-1314	National Science Foundation [CBET-1707042, HRD-1345169, HRD-1914490, HRD-1720912]	National Science Foundation(National Science Foundation (NSF))	The National Science Foundation provided funding for this research through grants CBET-1707042, HRD-1345169, HRD-1914490, and HRD-1720912. We thank the Editors and two anonymous reviewers for providing suggestions to improve our manuscript.		30	3	3	0	14	WILEY	HOBOKEN	111 RIVER ST, HOBOKEN 07030-5774, NJ USA	1541-5856			LIMNOL OCEANOGR-METH	Limnol. Oceanogr. Meth.	SEP	2020	18	9
J	Chakraborty, U; Bhanjana, G; Kaur, G; Kaushik, A; Chaudhary, GR				Chakraborty, U.; Bhanjana, G.; Kaur, G.; Kaushik, A.; Chaudhary, G. R.			Electro-active silver oxide nanocubes for label free direct sensing of bisphenol A to assure water quality	MATERIALS TODAY CHEMISTRY			English	Article						Bisphenol A; Silver oxide nanocubes; Chemical precipitation; Electrochemical sensor	GLASSY-CARBON ELECTRODE; MOLECULARLY IMPRINTED POLYMER; HIGHLY SENSITIVE DETECTION; ELECTROCHEMICAL SENSOR; GOLD NANOPARTICLES; LIQUID-CHROMATOGRAPHY; FACILE PREPARATION; RAPID DETECTION; BIOSENSOR; COMPOSITE	This research, for the first time, demonstrates a direct electrochemical detection of bisphenol A (BPA) using silver oxide (Ag2O) nanocubes (NCs) modified platinum electrode. The Ag2O NCs, size ranging from 60 to 100 nm utilized in this research as a smart electro-active sensing platform were pure and synthesized using a cost-effective, affordable, and facile chemical route. The Ag2O NCs modified…	[Chakraborty, U.; Bhanjana, G.; Kaur, G.; Chaudhary, G. R.] Panjab Univ, Dept Chem, Chandigarh 160014, India; [Chakraborty, U.; Bhanjana, G.; Kaur, G.; Chaudhary, G. R.] Panjab Univ, Ctr Adv Studies Chem, Chandigarh 160014, India; [Kaushik, A.] Florida Polytech Univ, Dept Nat Sci, Div Sci Arts & Math, NanoBioTech Lab, Lakeland, FL 33805 USA; [Chaudhary, G. R.] Panjab Univ, SAIF CIL, Chandigarh 16…	Panjab University; Panjab University; Florida Polytechnical University; Panjab University; Panjab University	Chaudhary, GR (corresponding author), Panjab Univ, Dept Chem, Chandigarh 160014, India.;Chaudhary, GR (corresponding author), Panjab Univ, Ctr Adv Studies Chem, Chandigarh 160014, India.;Kaushik, A (corresponding author), Florida Polytech Univ, Dept Nat Sci, Div Sci Arts & Math, NanoBioTech Lab, Lakeland, FL 33805 USA.;Chaudhary, GR (corresponding author), Panjab Univ, SAIF CIL, Chandigarh 160014…	akaushik@floridapoly.edu; grc22@pu.ac.in	Kaushik, Ajeet Kuamr/K-1289-2018	Kaushik, Ajeet Kuamr/0000-0003-4206-1541; Kaur, Gurpreet/0000-0002-8985-3186; Chaudhary, Ganga Ram/0000-0003-0501-6071; Bhanjana, Gaurav/0000-0001-5240-4793	UGC, India under the INDO-US 21st Century Knowledge Initiative Project [194-2/2016(IC)]; DST [IFA-12-CH41(IC)]; UGC [F.4-2/2006 (BSR)/EN/18-19/0005]; Council of Scientific and Industrial Research (CSIR), New Delhi [09/135(0764)/2017-EMR-I]	UGC, India under the INDO-US 21st Century Knowledge Initiative Project; DST(Department of Science & Technology (India)); UGC(University Grants Commission, India); Council of Scientific and Industrial Research (CSIR), New Delhi(Council of Scientific & Industrial Research (CSIR) - India)	GRC would like to acknowledge the support of UGC, India under the INDO-US 21st Century Knowledge Initiative Project (F.No.194-2/2016(IC)). GK thankful to DST for Inspire Faculty Award (IFA-12-CH41). GB thanks UGC, for providing financial support in the form of DS Kothari post doc fellowship (Reference No. F.4-2/2006 (BSR)/EN/18-19/0005). UC thanks Council of Scientific and Industrial Research (CS…		61	15	15	3	21	ELSEVIER SCI LTD	OXFORD	THE BOULEVARD, LANGFORD LANE, KIDLINGTON, OXFORD OX5 1GB, OXON, ENGLAND	2468-5194			MATER TODAY CHEM	Mater. Today Chem.	JUN	2020	16
J	Gul, SE; Cody, D; Kharchenko, A; Martin, S; Mintova, S; Cassidy, J; Naydenova, I				Gul, Sabad-e; Cody, Dervil; Kharchenko, Anastasia; Martin, Suzanne; Mintova, Svetlana; Cassidy, John; Naydenova, Izabela			LTL type nanozeolites utilized in surface photonics structures for environmental sensors	MICROPOROUS AND MESOPOROUS MATERIALS			English	Article						Zeolite nanoparticles; Nanosized zeolite based sensors; Water monitoring; Copper ions; Holography; Modified surface structures; Sensors	HOLOGRAMS; GRATINGS; COPPER; SILVER	Environmental monitoring has been continuously increasing due to an emerging global emphasis on the importance of sustainable development. Improving water quality monitoring and control is a challenge that calls for innovative solutions. Current methods of water monitoring are costly and analytical techniques suitable for field use are limited. There is a need for accurate, long-term monitoring o…	[Gul, Sabad-e; Cody, Dervil; Martin, Suzanne; Naydenova, Izabela] Dublin Inst Technol, Coll Sci & Hlth, Sch Phys Clin & Optometr Sci, Ctr Ind & Engn Opt, Kevin St, Dublin 8, Ireland; [Kharchenko, Anastasia; Mintova, Svetlana] Univ Caen Basse Normandie, ENSICAEN, CNRS, Lab Catalyse & Spectrochim, 6 Blvd Marechal Juin, F-14050 Caen, France; [Cassidy, John] Dublin Inst Technol, Coll Sci & Hlth, Sch …	Centre National de la Recherche Scientifique (CNRS); Universite de Caen Normandie	Naydenova, I (corresponding author), Dublin Inst Technol, Coll Sci & Hlth, Sch Phys Clin & Optometr Sci, Ctr Ind & Engn Opt, Kevin St, Dublin 8, Ireland.	izabela.naydenova@dit.ie	Cody, Dervil/W-3319-2019; Mintova, Svetlana/N-7933-2018	Cody, Dervil/0000-0002-8921-0201; Mintova, Svetlana/0000-0002-0738-5244; Cassidy, John/0000-0002-7081-8268; Gul, sabad-e-/0000-0003-4795-1068; Naydenova, Izabela/0000-0002-0810-2197; Kharchenko, Anastasia/0000-0002-3521-6579	DIT Fiosraigh Scholarship	DIT Fiosraigh Scholarship	This work was supported by DIT Fiosraigh Scholarship. The authors express their cordial gratitude to Focas Research Institute at DIT for providing access to their experimental facilities. The authors would like to acknowledge the contribution of Dr. Luke O'Neill and Dr. Brian Goery who collected the SEM data for TEOS and TEOS/LTL nanocomposite. The authors are also thankful to the IEO team member…		25	9	9	0	31	ELSEVIER SCIENCE BV	AMSTERDAM	PO BOX 211, 1000 AE AMSTERDAM, NETHERLANDS	1387-1811	1873-3093		MICROPOR MESOPOR MAT	Microporous Mesoporous Mat.	2023-05-01	2018	261
J	Cadena-Pereda, RO; Rivera-Munoz, EM; Herrera-Ruiz, G; Gomez-Melendez, DJ; Anaya-Rivera, EK				Cadena-Pereda, Raul O.; Rivera-Munoz, Eric M.; Herrera-Ruiz, Gilberto; Gomez-Melendez, Domingo J.; Anaya-Rivera, Ely K.			Automatic Carbon Dioxide-Methane Gas Sensor Based on the Solubility of Gases in Water	SENSORS			English	Article						reconfigurable logic; gas solubility; binary gas sensor; mathematical model	POLYMERIC MEMBRANES; PID CONTROLLERS; BIOGAS; DIOXIDE/METHANE; PERMSELECTIVITY; MIXTURES; DESIGN	Biogas methane content is a relevant variable in anaerobic digestion processing where knowledge of process kinetics or an early indicator of digester failure is needed. The contribution of this work is the development of a novel, simple and low cost automatic carbon dioxide-methane gas sensor based on the solubility of gases in water as the precursor of a sensor for biogas quality monitoring. The…	[Cadena-Pereda, Raul O.] Univ Autonoma Queretaro, Lab Biotron, Dept Invest & Posgrado, Fac Ingn, Queretaro 76010, Mexico; [Cadena-Pereda, Raul O.; Gomez-Melendez, Domingo J.; Anaya-Rivera, Ely K.] Univ Politecn Queretaro, El Marques 76010, Queretaro, Mexico; [Rivera-Munoz, Eric M.] Univ Nacl Autonoma Mexico, Ctr Fis Aplicada & Tecnol Avanzada, Queretaro 76000, Mexico; [Herrera-Ruiz, Gilberto] Uni…	Universidad Autonoma de Queretaro; Universidad Nacional Autonoma de Mexico; Universidad Autonoma de Queretaro	Cadena-Pereda, RO (corresponding author), Univ Autonoma Queretaro, Lab Biotron, Dept Invest & Posgrado, Fac Ingn, Ctr Univ Cerro Campanas S-N, Queretaro 76010, Mexico.	omar.cadena@upq.edu.mx; emrivera@fata.unam.mx; gherrera@uaq.mx; domingo.gomez@upq.mx; karina.anaya@upq.mx	Muñoz, Eric Mauricio Rivera/G-5542-2013; Rivera, Karina Anaya/AAU-2929-2020	Muñoz, Eric Mauricio Rivera/0000-0003-1413-9065;					22	7	7	0	37	MDPI AG	BASEL	ST ALBAN-ANLAGE 66, CH-4052 BASEL, SWITZERLAND	1424-8220			SENSORS-BASEL	Sensors	AUG	2012	12	8
J	Shi, JY; Li, WT; Zou, XB; Zhang, F; Chen, Y				Shi Ji-yong; Li Wen-ting; Zou Xiao-bo; Zhang Fang; Chen Ying			Multi-Index Rapid Detection of Salmon Quality Based on Near-Infrared Spectroscopy	SPECTROSCOPY AND SPECTRAL ANALYSIS			Chinese	Article						Salmon quality; NIRs; Chemometrics; Multi-index; Rapid detection		Salmon is expensivebut popular among consumers because of its good-taste, sweet flavor and high nutritional values. The import volume of salmon in 2017 reaches 350 million dollars. The problems of selling shoddy salmon for quality salmon by unscrupulous businessmen, who are pursuing high profit only, become more and more serious. The problems can be mainly manifested by the following steps: (1) U…	[Shi Ji-yong; Li Wen-ting; Zou Xiao-bo; Zhang Fang] Jiangsu Univ, Sch Food & Biol Engn, Zhenjiang 212013, Jiangsu, Peoples R China; [Chen Ying] Chinese Acad Inspect & Quarantine, Beijing 100123, Peoples R China	Jiangsu University; Chinese Academy of Inspection & Quarantine	Zou, XB (corresponding author), Jiangsu Univ, Sch Food & Biol Engn, Zhenjiang 212013, Jiangsu, Peoples R China.	shi_jiyong@ujs.edu.en; zou_xiaobo@ujs.edu.cn	Chen, Ying/E-9891-2015						15	1	6	1	29	OFFICE SPECTROSCOPY & SPECTRAL ANALYSIS	BEIJING	NO 76 COLLAGE SOUTH RD BEIJING, BEIJING 100081, PEOPLES R CHINA	1000-0593			SPECTROSC SPECT ANAL	Spectrosc. Spectr. Anal.	JUL	2019	39	7
J	Keenan, LW; Miller, SJ				Keenan, Lawrence W.; Miller, Steven J.			An Inexpensive, Low-Maintenance, Precision Amplifier, Dissolved Oxygen Sensor, and Miniature Data Logger System Designed for Long-Term Deployment in Riverine Systems	TRANSACTIONS OF THE AMERICAN FISHERIES SOCIETY			English	Article								The dissolved oxygen (DO) concentration is a dynamic water quality variable that is critical to fisheries. To obtain simultaneous DO data at 15-min intervals over long periods (i.e., months) at a number of points along a river, a simple, inexpensive (<US$40) differential voltage amplifier circuit was developed to provide an interface between a galvanic DO probe and a miniature data logger. The ci…	[Keenan, Lawrence W.; Miller, Steven J.] St Johns River Water Management Dist, Div Environm Sci, Palatka, FL 32177 USA		Keenan, LW (corresponding author), St Johns River Water Management Dist, Div Environm Sci, 4049 Reid St,POB 1429, Palatka, FL 32177 USA.	lkeenan@sjrwmd.com	Miller, Steven Jeffrey/B-5047-2009						5	1	1	0	10	TAYLOR & FRANCIS INC	PHILADELPHIA	530 WALNUT STREET, STE 850, PHILADELPHIA, PA 19106 USA	0002-8487	1548-8659		T AM FISH SOC	Trans. Am. Fish. Soc.	MAR	2010	139	2
J	Tauro, F; Aureli, M; Porfiri, M; Grimaldi, S				Tauro, Flavia; Aureli, Matteo; Porfiri, Maurizio; Grimaldi, Salvatore			Characterization of Buoyant Fluorescent Particles for Field Observations of Water Flows	SENSORS			English	Article						fluorescent particles; hillslope processes; hydrologic tracers; processing of sensed data; sensors' applications	IMAGE VELOCIMETRY; SCALE; TRACERS; SURFACE; STREAM; RIVER; VELOCITIES; DISPERSAL; PROTEINS	In this paper, the feasibility of off-the-shelf buoyant fluorescent microspheres as particle tracers in turbid water flows is investigated. Microspheres' fluorescence intensity is experimentally measured and detected in placid aqueous suspensions of increasing concentrations of clay to simulate typical conditions occurring in natural drainage networks. Experiments are conducted in a broad range o…	[Tauro, Flavia; Aureli, Matteo; Porfiri, Maurizio; Grimaldi, Salvatore] NYU, Polytech Inst, Dept Mech & Aerosp Engn, Brooklyn, NY 11201 USA; [Tauro, Flavia; Grimaldi, Salvatore] Univ Roma La Sapienza, Honors Ctr Italian Univ H2CU, I-00184 Rome, Italy; [Grimaldi, Salvatore] Univ Tuscia, GEMINI Dept, Sch Agr, I-01100 Viterbo, Italy	New York University; New York University Tandon School of Engineering; Sapienza University Rome; Tuscia University	Porfiri, M (corresponding author), NYU, Polytech Inst, Dept Mech & Aerosp Engn, Brooklyn, NY 11201 USA.	mporfiri@poly.edu	Aureli, Matteo/D-4511-2019; Tauro, Flavia/AAA-6086-2020; Porfiri, Maurizio/A-1712-2009	Aureli, Matteo/0000-0003-4242-0081; TAURO, Flavia/0000-0002-5176-3492; Porfiri, Maurizio/0000-0002-1480-3539	National Science Foundation [CMMI-0745753, CMMI-0926791]; Honors Center of Italian Universities; Div Of Civil, Mechanical, & Manufact Inn; Directorate For Engineering [0745753] Funding Source: National Science Foundation	National Science Foundation(National Science Foundation (NSF)); Honors Center of Italian Universities; Div Of Civil, Mechanical, & Manufact Inn; Directorate For Engineering(National Science Foundation (NSF)NSF - Directorate for Engineering (ENG))	This work has been supported in part by the National Science Foundation under Grant Nos. CMMI-0745753 and CMMI-0926791 and in part by the Honors Center of Italian Universities. The authors would like to gratefully acknowledge Sean D. Peterson from the University of Waterloo for thoughtful discussion and careful review of the manuscript. The authors also acknowledge Christopher Pagano for his help…		55	26	27	1	18	MDPI	BASEL	ST ALBAN-ANLAGE 66, CH-4052 BASEL, SWITZERLAND		1424-8220		SENSORS-BASEL	Sensors	DEC	2010	10	12
J	Kumar, S; Nehra, M; Mehta, J; Dilbaghi, N; Marrazza, G; Kaushik, A				Kumar, Sandeep; Nehra, Monika; Mehta, Jyotsana; Dilbaghi, Neeraj; Marrazza, Giovanna; Kaushik, Ajeet			Point-of-Care Strategies for Detection of Waterborne Pathogens	SENSORS			English	Review						POC sensor; smart sensing; health quality; water health diagnostics; nanotechnology	LATERAL FLOW ASSAY; ESCHERICHIA-COLI; RAPID DETECTION; IMMUNOMAGNETIC SEPARATION; DRINKING-WATER; SIMULTANEOUS QUANTIFICATION; LISTERIA-MONOCYTOGENES; COLORIMETRIC DETECTION; BACTERIAL PATHOGENS; MICROFLUIDIC DEVICE	Waterborne diseases that originated due to pathogen microorganisms are emerging as a serious global health concern. Therefore, rapid, accurate, and specific detection of these microorganisms (i.e., bacteria, viruses, protozoa, and parasitic pathogens) in water resources has become a requirement of water quality assessment. Significant research has been conducted to develop rapid, efficient, scala…	[Kumar, Sandeep; Nehra, Monika; Mehta, Jyotsana; Dilbaghi, Neeraj] Guru Jambheshwar Univ Sci & Technol, Dept Bio & Nano Technol, Hisar 125001, Haryana, India; [Marrazza, Giovanna] Univ Florence, Dept Chem Ugo Schiff, Via Lastruccia 3, I-50019 Florence, Italy; [Kaushik, Ajeet] Florida Polytech Univ, Dept Nat Sci, Lakeland, FL 33805 USA	Guru Jambheshwar University of Science & Technology; University of Florence; Florida Polytechnical University	Kumar, S (corresponding author), Guru Jambheshwar Univ Sci & Technol, Dept Bio & Nano Technol, Hisar 125001, Haryana, India.;Kaushik, A (corresponding author), Florida Polytech Univ, Dept Nat Sci, Lakeland, FL 33805 USA.	sandeep2417@gjust.org; ssmonikanehra@gmail.com; jyotsanamehta1@gmail.com; ndnano@gjust.org; giovanna.marrazza@unifi.it; akaushik@floridapoly.edu	Kaushik, Ajeet Kuamr/K-1289-2018; Kumar, Sandeep/IUQ-2320-2023	Kaushik, Ajeet Kuamr/0000-0003-4206-1541; Kumar, Sandeep/0000-0002-0848-632X; Dilbaghi, Neeraj/0000-0002-3503-4206; MEHTA, JYOTSANA/0000-0002-3681-4749; Marrazza, Giovanna/0000-0003-2465-7552	HSCST, Govt. of Haryana, India [HSCST/RD/2018/2103]; DST-PURSE [SR/PURSE Phase 2/40(G)]; CSIR [B-12587]	HSCST, Govt. of Haryana, India; DST-PURSE; CSIR(Council of Scientific & Industrial Research (CSIR) - India)	This research was funded by HSCST, Govt. of Haryana, India (research grant vide letter No. HSCST/R&D/2018/2103 dated 01-08-2018) and DST-PURSE sanctioned to GJUS&T, Hisar under PURSE program No. SR/PURSE Phase 2/40(G). JM is grateful to CSIR for SRA fellowship (No. B-12587 Dates 01-08-2019).		110	38	39	6	38	MDPI	BASEL	ST ALBAN-ANLAGE 66, CH-4052 BASEL, SWITZERLAND		1424-8220		SENSORS-BASEL	Sensors	2023-10-02	2019	19	20
J	Adriaens, P; Goovaerts, P; Skerlos, S; Edwards, E; Egli, T				Adriaens, P; Goovaerts, P; Skerlos, S; Edwards, E; Egli, T			Intelligent infrastructure for sustainable potable water: a roundtable for emerging transnational research and technology development needs	BIOTECHNOLOGY ADVANCES			English	Review						sustainability; potable water; sensors; information technology; point-of-use treatment		Problem statement: Recent commercial and residential development have substantially impacted the fluxes and quality of water that recharge the aquifers and discharges to streams, lakes and wetlands and, ultimately, is recycled for potable use. Whereas the contaminant sources may be varied in scope and composition, these issues of urban water sustainability are of public health concern at all leve…	Univ Michigan, Dept Civil & Environm Engn, Ann Arbor, MI 48109 USA; Univ Michigan, Dept Mech Engn, Ann Arbor, MI 48109 USA; Univ Toronto, Dept Chem Engn & Appl Chem, Toronto, ON, Canada; Swiss Fed Inst Environm Sci & Technol, Dept Microbiol, Dubendorf, Switzerland	University of Michigan System; University of Michigan; University of Michigan System; University of Michigan; University of Toronto; Swiss Federal Institutes of Technology Domain; Swiss Federal Institute of Aquatic Science & Technology (EAWAG)	Adriaens, P (corresponding author), Univ Michigan, Dept Civil & Environm Engn, Ann Arbor, MI 48109 USA.	adriaens@engin.umich.edu	Edwards, Elizabeth Anne/GXV-2307-2022	Edwards, Elizabeth/0000-0002-8071-338X					24	11	12	0	43	PERGAMON-ELSEVIER SCIENCE LTD	OXFORD	THE BOULEVARD, LANGFORD LANE, KIDLINGTON, OXFORD OX5 1GB, ENGLAND	0734-9750	1873-1899		BIOTECHNOL ADV	Biotechnol. Adv.	DEC	2003	22	2023-01-02
J	Rousso, BZ; Bertone, E; Stewart, RA; Hobson, P; Hamilton, DP				Rousso, Benny Zuse; Bertone, Edoardo; Stewart, Rodney A.; Hobson, Peter; Hamilton, David P.			Automation of species-specific cyanobacteria phycocyanin fluorescence compensation using machine learning classification	ECOLOGICAL INFORMATICS			English	Article						Harmful algal blooms; Fluorescence sensors; Water quality monitoring; Species prediction; Water resources management	FRESH-WATER LAKES; POPULATION-DYNAMICS; CLIMATE-CHANGE; IN-VIVO; GLOBAL EXPANSION; BLOOMS; DOMINANCE; EUTROPHICATION; ASSOCIATIONS; MANAGEMENT	High-frequency cyanobacteria monitoring often uses in-situ fluorescence of phycocyanin (f-PC). However, f-PC must be calibrated for the dominant cyanobacteria species, and it cannot distinguish cyanobacteria taxa, which relies on conventional time-consuming cyanobacteria identification methods. This study proposes a framework to automate f-PC species-specific compensation through three components…	[Rousso, Benny Zuse; Bertone, Edoardo; Stewart, Rodney A.] Griffith Univ, Griffith Sch Engn & Built Environm, Parklands Dr, Southport, Qld 4222, Australia; [Rousso, Benny Zuse; Bertone, Edoardo; Stewart, Rodney A.] Griffith Univ, Cities Res Inst, Parklands Dr, Southport, Qld 4222, Australia; [Bertone, Edoardo; Hamilton, David P.] Griffith Univ, Australian Rivers Inst, 170 Kessels Rd, Nathan, Qld …	Griffith University; Griffith University; Griffith University	Bertone, E (corresponding author), Griffith Univ, Griffith Sch Engn & Built Environm, Parklands Dr, Southport, Qld 4222, Australia.	e.bertone@griffith.edu.au	Zuse Rousso, Benny/HPG-7028-2023	Zuse Rousso, Benny/0000-0003-4274-0958					89	1	1	0	7	ELSEVIER	AMSTERDAM	RADARWEG 29, 1043 NX AMSTERDAM, NETHERLANDS	1574-9541	1878-0512		ECOL INFORM	Ecol. Inform.	JUL	2022	69
J	Carafa, R; Lorenzo, NE; Llopart, JS; Kumar, V; Schuhmacher, M				Carafa, Roberta; Exposito Lorenzo, Nora; Sierra Llopart, Jordi; Kumar, Vikas; Schuhmacher, Marta			Characterization of river biofilm responses to the exposure with heavy metals using a novel micro fluorometer biosensor	AQUATIC TOXICOLOGY			English	Article						Toxicity; Heavy metal; Chemical speciation; River biofilm; EC50; Surface water monitoring	FRESH-WATER; FUNCTIONAL RECOVERY; FLUVIAL BIOFILMS; PAM-FLUOROMETRY; TOXICITY; COMMUNITIES; COPPER; FLUORESCENCE; IMPACTS; PHOTOSYNTHESIS	River biofilms are a suitable indicator of toxic stress in aquatic ecosystems commonly exposed to various anthropogenic pollutants from industrial, domestic, and agricultural sources. Among these pollutants, heavy metals are of particular concern as they are known to interfere with various physiological processes of river biofilm, directly or indirectly related to photosynthetic performance. Neve…	[Carafa, Roberta; Exposito Lorenzo, Nora; Kumar, Vikas; Schuhmacher, Marta] Univ Rovira & Virgili, Dept Engn Quim, Environm Engn Lab, Av Paisos Catalans 26, Tarragona 43007, Spain; [Sierra Llopart, Jordi] Univ Barcelona, Fac Pharm, Soil Sci Unit, Campus Diagonal,Av Joan XXIII 27-31, Barcelona 08028, Spain; [Kumar, Vikas] Univ Rovira & Virgili, Hosp Univ St Joan Reus, IISPV, Avinguda Doctor Josep …	Universitat Rovira i Virgili; University of Barcelona; Universitat Rovira i Virgili; Institut d'Investigacio Sanitaria Pere Virgili (IISPV)	Carafa, R (corresponding author), Univ Rovira & Virgili, Dept Engn Quim, Environm Engn Lab, Av Paisos Catalans 26, Tarragona 43007, Spain.	roberta.carafa@fundacio.urv.cat	Kumar, Vikas/E-3272-2018; Kumar, Vikas/M-2306-2014	Kumar, Vikas/0000-0002-8062-7123; carafa, roberta/0000-0002-5156-0011; Exposito, Nora/0000-0002-0648-6342; Kumar, Vikas/0000-0002-9795-5967	Tecniospring Plus programme; ACCIO; European Union [712949, TECSPR17-1-0012]; Health Department of Catalonia Government troughPla Estrategic de Recerca i Innovacio en salut (PERIS 2016-2020)	Tecniospring Plus programme; ACCIO; European Union(European CommissionSpanish Government); Health Department of Catalonia Government troughPla Estrategic de Recerca i Innovacio en salut (PERIS 2016-2020)	The authors thank the Tecniospring Plus programme and ACCIO for funding this project. This project has received funding from the European Union's Horizon 2020 research and innovation programme under the Marie Sklodowska-Curie grant agreement No 712949 (grant number: TECSPR17-1-0012). Xavier Gomara Barbera from URV, supported part of the laboratory analysis. V. Kumar received funds from Health Dep…		49	4	4	1	24	ELSEVIER	AMSTERDAM	RADARWEG 29, 1043 NX AMSTERDAM, NETHERLANDS	0166-445X	1879-1514		AQUAT TOXICOL	Aquat. Toxicol.	FEB	2021	231
J	de Oliveira, HFE; Campos, HD; Mesquita, M; Machado, RL; Vale, LSR; Siqueira, APS; Ferrarezi, RS				de Oliveira, Henrique Fonseca E.; de Moura Campos, Hugo; Mesquita, Marcio; Machado, Roriz Luciano; Vale, Luis Sergio Rodrigues; Siqueira, Ana Paula Silva; Ferrarezi, Rhuanito Soranz			Horticultural Performance of Greenhouse Cherry Tomatoes Irrigated Automatically Based on Soil Moisture Sensor Readings	WATER			English	Article						Solanum lycopersicum var. cerasiforme; deficit irrigation; soluble solids content; water use efficiency	REGULATED DEFICIT IRRIGATION; WATER-USE EFFICIENCY; FRUIT-QUALITY; YIELD RESPONSE; NITROGEN; CAROTENOIDS; PHENOLICS; PRODUCTIVITY; VARIETIES; SYSTEM	Precision irrigation is essential to improve water use efficiency (WUE), defined as the amount of biomass produced per unit of water used by plants. Our objective is to evaluate the effect of different soil volumetric water content (VWC) in plant growth, fruit yield, quality, and WUE of cherry tomatoes grown in a greenhouse. We tested four VWC thresholds (0.23, 0.30, 0.37, and 0.44 m(3) m(-3)) to…	[de Oliveira, Henrique Fonseca E.; de Moura Campos, Hugo; Machado, Roriz Luciano; Vale, Luis Sergio Rodrigues] Goiano Fed Inst, Cerrado Irrigat Grad Program, BR-76300000 Ceres, Go, Brazil; [Mesquita, Marcio] Univ Fed Goias, Sch Agron, BR-74690900 Goiania, Go, Brazil; [Siqueira, Ana Paula Silva] Goiano Fed Inst, Dept Food Sci & Technol, BR-75790000 Urutai, Go, Brazil; [Ferrarezi, Rhuanito Soranz] …	Instituto Federal de Goias (IFG); Universidade Federal de Goias; Instituto Federal de Goias (IFG); State University System of Florida; University of Florida; University System of Georgia; University of Georgia	Ferrarezi, RS (corresponding author), Univ Florida, Dept Hort Sci, Indian River Res & Educ Ctr, Ft Pierce, FL 34945 USA.;Ferrarezi, RS (corresponding author), Univ Georgia, Dept Hort, Athens, GA 30602 USA.	henrique.fonseca@ifgoiano.edu.br; hugo.campos@ifgoiano.edu.br; marciomes@gmail.com; roriz.machado@ifgoiano.edu.br; luis.sergio@ifgoiano.edu.br; ana.siqueira@ifgoiano.edu.br; ferrarezi@uga.edu	Ferrarezi, Rhuanito Soranz/AAI-2598-2019; Mesquita, Marcio/C-8358-2019; Oliveira, Henrique/M-7142-2018	Ferrarezi, Rhuanito Soranz/0000-0002-6873-7995; Mesquita, Marcio/0000-0001-9399-4478; Oliveira, Henrique/0000-0001-8698-292X	Goiano Federal Institute [21/2015]; U.S. Department of Agriculture (USDA) National Institute of Food and Agriculture (NIFA) [1015783]; USDA-NIFA [1021596]	Goiano Federal Institute; U.S. Department of Agriculture (USDA) National Institute of Food and Agriculture (NIFA); USDA-NIFA(United States Department of Agriculture (USDA))	Funding was provided by Goiano Federal Institute (Call for Proposals and Cooperative Projects of Applied Research No. 21/2015), U.S. Department of Agriculture (USDA) National Institute of Food and Agriculture (NIFA) Hatch/Multi-State W3128 Scaling Microirrigation Technologies to Address the Global Water Challenge (Accession no. 1015783), and USDA-NIFA Hatch/Multi-State W4128 Microirrigation: A Su…		61	6	6	3	22	MDPI	BASEL	ST ALBAN-ANLAGE 66, CH-4052 BASEL, SWITZERLAND		2073-4441		WATER-SUI	Water	OCT	2021	13	19
J	Ma, Z; Liu, J; Sallach, JB; Hu, XJ; Gao, YZ				Ma, Zhao; Liu, Juan; Sallach, J. Brett; Hu, Xiaojie; Gao, Yanzheng			Whole-cell paper strip biosensors to semi-quantify tetracycline antibiotics in environmental matrices	BIOSENSORS & BIOELECTRONICS			English	Article						Paper strip; Tetracyclines; Detection; Semi-quantity; Water; Soil	RESISTANCE GENES; LIQUID-CHROMATOGRAPHY; SOIL; CHLORTETRACYCLINE; OXYTETRACYCLINE; AQUACULTURE; MANURE; SENSOR; WATER; QUANTIFICATION	A novel, low-cost, and portable paper strip biosensor was developed for the detection of tetracycline antibiotics. Escherichia coli/pMTLacZ containing the tetracycline-mediated regulatory gene used as recognition elements with beta-galactosidase as the reporter protein was designed and applied to cheap and portable Whatman filter paper as the carrier to prepare this paper strip biosensor. The det…	[Ma, Zhao; Liu, Juan; Hu, Xiaojie; Gao, Yanzheng] Nanjing Agr Univ, Coll Resources & Environm Sci, Inst Organ Contaminant Control & Soil Remediat, Nanjing 210095, Peoples R China; [Sallach, J. Brett] Univ York, Dept Environm & Geog, York YO10 4DU, N Yorkshire, England	Nanjing Agricultural University; N8 Research Partnership; White Rose University Consortium; University of York - UK	Gao, YZ (corresponding author), Weigang Rd 1, Nanjing 210095, Peoples R China.	gaoyanzheng@njau.edu.cn	Gao, Yanzheng/G-6391-2010; Hu, Xiaojie/GXN-2878-2022	Gao, Yanzheng/0000-0002-3814-3555; Ma, Zhao/0000-0001-5215-2813	National Science Fund for Distinguished Young Scholars [41925029]; National Natural Science Foundation of China [41877125]	National Science Fund for Distinguished Young Scholars(National Natural Science Foundation of China (NSFC)National Science Fund for Distinguished Young Scholars); National Natural Science Foundation of China(National Natural Science Foundation of China (NSFC))	We received financial support from the National Science Fund for Distinguished Young Scholars (41925029), and the National Natural Science Foundation of China (41877125).		52	24	25	15	120	ELSEVIER ADVANCED TECHNOLOGY	OXFORD	OXFORD FULFILLMENT CENTRE THE BOULEVARD, LANGFORD LANE, KIDLINGTON, OXFORD OX5 1GB, OXON, ENGLAND	0956-5663	1873-4235		BIOSENS BIOELECTRON	Biosens. Bioelectron.	2023-11-15	2020	168
J	Kaur, M; Nagao, T				Kaur, Manpreet; Nagao, Tadaaki			Minireview on Solar Desalination and Hydropower Generation by Water Evaporation: Recent Challenges and Perspectives in Materials Science	ENERGY & FUELS			English	Review							POWER-GENERATION; ELECTRICITY-GENERATION; STEAM-GENERATION; GRAPHENE AEROGEL; VAPOR GENERATION; ENERGY; EFFICIENT; DRIVEN; HEAT; LIQUID	Environmental energy harvesting holds great promise for sustainable development of society. Today, there are many kinds of available energy sources, such as hydropower, nuclear energy, thermal power, etc., but all of these suffer from requiring massive infrastructure investment, producing environmental pollution, and/or having the potential to experience catastrophic failure. In this review, we i…	[Kaur, Manpreet; Nagao, Tadaaki] Natl Inst Mat Sci NIMS, Int Ctr Mat Nanoarchitecton WPI MANA, Tsukuba, Ibaraki 3050044, Japan; [Nagao, Tadaaki] Hokkaido Univ, Dept Condensed Matter Phys, Sapporo, Hokkaido 0600810, Japan	National Institute for Materials Science; Hokkaido University	Kaur, M; Nagao, T (corresponding author), Natl Inst Mat Sci NIMS, Int Ctr Mat Nanoarchitecton WPI MANA, Tsukuba, Ibaraki 3050044, Japan.;Nagao, T (corresponding author), Hokkaido Univ, Dept Condensed Matter Phys, Sapporo, Hokkaido 0600810, Japan.	manpreet.kaur@nims.go.jp; nagao.tadaaki@nims.go.jp	NAGAO, Tadaaki/H-2582-2011; Kaur, Manpreet/HJZ-4398-2023	NAGAO, Tadaaki/0000-0002-6746-2686;	Japan Society for the Promotion of Science (JSPS) [16H06364]; CREST Phase Interface Science for Highly Efficient Energy Utilization from the Japan Science and Technology Agency [JPMJCR13C3]	Japan Society for the Promotion of Science (JSPS)(Ministry of Education, Culture, Sports, Science and Technology, Japan (MEXT)Japan Society for the Promotion of Science); CREST Phase Interface Science for Highly Efficient Energy Utilization from the Japan Science and Technology Agency	This work was supported by the Japan Society for the Promotion of Science (JSPS) Grants-in-Aid for Scientific Research (KAKENHI) (16H06364) and CREST Phase Interface Science for Highly Efficient Energy Utilization (JPMJCR13C3) from the Japan Science and Technology Agency.		96	3	3	22	56	AMER CHEMICAL SOC	WASHINGTON	1155 16TH ST, NW, WASHINGTON, DC 20036 USA	0887-0624	1520-5029		ENERG FUEL	Energy Fuels	2023-10-06	2022	36	19
J	Lee, JY; Ko, K; Chung, H				Lee, Ji-yeon; Ko, Kwanyoung; Chung, Haegeun			Application of colorimetric sensor in monitoring dissolved CO2 in natural waters	JOURNAL OF ENVIRONMENTAL MANAGEMENT			English	Article						Dissolved CO2; Colorimetric sensor; Groundwater; Surface water; pH; Cresol red	CARBON-DIOXIDE SENSOR; OPTICAL SENSOR; GROUNDWATER QUALITY; PLASTIC FILM; LEAKAGE	Dissolved CO(2 )originating from underground structures at high concentrations may pose a threat to public and environmental health. Therefore, a convenient monitoring technique that allows fast detection of dissolved CO(2 )needs to be developed. In this study, a low-cost colorimetric CO(2 )sensor was applied for monitoring dissolved CO2. The sensor is composed of an acrylic reactor, cresol red p…	[Lee, Ji-yeon; Ko, Kwanyoung; Chung, Haegeun] Konkuk Univ, Dept Environm Engn, Seoul 143701, South Korea	Konkuk University	Chung, H (corresponding author), Konkuk Univ, Dept Environm Engn, Seoul 143701, South Korea.	jyjtv1226@gmail.com; kwanyko@konkuk.ac.kr; hchung@konkuk.ac.kr			Korea Ministry of Environment (MOE) [2018001810003]; National Research Foundation of Korea (NRF) - Korea government (MSIT) [2021R1A4A102555311, 2020R1A2C101228212]	Korea Ministry of Environment (MOE)(Ministry of Environment (ME), Republic of Korea); National Research Foundation of Korea (NRF) - Korea government (MSIT)(National Research Foundation of KoreaMinistry of Science, ICT & Future Planning, Republic of KoreaMinistry of Science & ICT (MSIT), Republic of Korea)	This work was supported by the Korea Ministry of Environment (MOE) under the Korea CO<INF>2</INF> Storage Environmental Management (K-COSEM) Research Program [project number 2018001810003], the National Research Foundation of Korea (NRF) grant funded by the Korea government (MSIT) (No. 2021R1A4A102555311), and the National Research Foundation of Korea (NRF) grant funded by the Korea government (M…		35	4	4	9	43	ACADEMIC PRESS LTD- ELSEVIER SCIENCE LTD	LONDON	24-28 OVAL RD, LONDON NW1 7DX, ENGLAND	0301-4797	1095-8630		J ENVIRON MANAGE	J. Environ. Manage.	2023-06-15	2022	312
J	da Silva, AG; Sa, STD; dos Santos, DH; de Negreiros, APF; Silva, JMVBD; Jacobo, JEA; Goncalves, LMG				da Silva Junior, Andouglas Goncalves; de Lima Sa, Sarah Thomaz; dos Santos, Davi Henrique; Ferrnandes de Negreiros, Alvaro Pinto; Boas de Souza Silva, Joao Moreno Vilas; Alvarez Jacobo, Justo Emilio; Garcia Goncalves, Luiz Marcos			Towards a Real-Time Embedded System for Water Monitoring Installed in a Robotic Sailboat	SENSORS			English	Article						sensors architecture; monitoring system; autonomous robotic sailboat		Problems related to quality (and quantity) of water in natural resources or in artificial reservoirs are frequently arising and are at the center of attention of authorities and governments around the world. Many times the monitoring is not performed in an efficient time frame and a precise manner, whereas the adoption of fast and punctual solutions would undoubtedly improve the water quality and…	[da Silva Junior, Andouglas Goncalves; de Lima Sa, Sarah Thomaz; dos Santos, Davi Henrique; Ferrnandes de Negreiros, Alvaro Pinto; Alvarez Jacobo, Justo Emilio; Garcia Goncalves, Luiz Marcos] Univ Fed Rio Grande do Norte, Dept Engn Comp & Automacao, DCA CT UFRN, Campus Univ, BR-59078970 Natal, RN, Brazil; [da Silva Junior, Andouglas Goncalves] Inst Fed Educ Ciencia & Tecnol Rio Grande Norte, Camp…	Universidade Federal do Rio Grande do Norte; Instituto Federal do Rio Grande do Norte; Instituto Federal do Rio Grande do Norte	Goncalves, LMG (corresponding author), Univ Fed Rio Grande do Norte, Dept Engn Comp & Automacao, DCA CT UFRN, Campus Univ, BR-59078970 Natal, RN, Brazil.	andouglasjr@gmail.com; sarah@dca.ufrn.br; davihenriqueds@dca.ufrn.br; alvaro.negreiros@gmail.com; joao.vilasboas@ifrn.edu.br; justo.alvarez@gmail.com; lmarcos@dca.ufrn.br	Gonçalves, Luiz Marcos Garcia/C-3786-2009; da Silva Júnior, Andouglas Gonçalves/AAO-9307-2020	Gonçalves, Luiz Marcos Garcia/0000-0002-7735-5630; da Silva Júnior, Andouglas Gonçalves/0000-0003-0579-8464; Negreiros, Alvaro/0000-0001-8162-7144; Vilas Boas, Joao Moreno/0000-0002-3200-6605	CAPES; CNPq	CAPES(Coordenacao de Aperfeicoamento de Pessoal de Nivel Superior (CAPES)); CNPq(Conselho Nacional de Desenvolvimento Cientifico e Tecnologico (CNPQ))	To CAPES and CNPq, Brazilian sponsoring agencies, for the grants of Andouglas G. Silva Junior, Sarah T. L. Sa, Davi H. dos Santos, Alvaro de Negreiros, Joao M. V. B. S. Silva, and Justo E. A. Jacobo.		20	7	7	0	25	MDPI	BASEL	ST ALBAN-ANLAGE 66, CH-4052 BASEL, SWITZERLAND		1424-8220		SENSORS-BASEL	Sensors	AUG	2016	16	8
J	Samanta, S; Srivastava, R				Samanta, Subhajyoti; Srivastava, Rajendra			CuCo2O4 based economical electrochemical sensor for the nanomolar detection of hydrazine and metol	JOURNAL OF ELECTROANALYTICAL CHEMISTRY			English	Article						Metal oxide; Spinels; Electrocatalytic oxidation; Hydrazine; Metol	HIGH-PERFORMANCE SUPERCAPACITOR; GLASSY-CARBON ELECTRODE; REDUCED GRAPHENE OXIDE; ELECTROCATALYTIC OXIDATION; ENERGY-STORAGE; HYDROTHERMAL SYNTHESIS; FACILE PREPARATION; ASCORBIC-ACID; ION; NICO2O4	Nanocrystalline CuCo2O4 was synthesized in the presence of ammonium fluoride and urea. Material was characterized by the complementary combination of X-ray diffraction, N-2-adsorption, ultraviolet-visible diffuse reflectance spectroscopy, field enhanced scanning electron microscopic and transmission electron microscopic techniques. Electrochemical sensor based on CuCo2O4 was developed for the det…	[Samanta, Subhajyoti; Srivastava, Rajendra] Indian Inst Technol, Dept Chem, Ropar 140001, Rupnagar, India	Indian Institute of Technology System (IIT System); Indian Institute of Technology (IIT) - Ropar	Srivastava, R (corresponding author), Indian Inst Technol, Dept Chem, Ropar 140001, Rupnagar, India.	rajendra@iitrpr.ac.in	Samanta, Subhajyoti/AAQ-4328-2020	Samanta, Subhajyoti/0000-0002-4461-1319	Department of Science and Technology, New Delhi [SB/S1/PC-91/2012]	Department of Science and Technology, New Delhi(Department of Science & Technology (India))	Authors thank Department of Science and Technology, New Delhi for financial assistance (DST grant SB/S1/PC-91/2012). Authors are also thankful to Director IIT Ropar for his constant encouragement.		50	42	42	4	142	ELSEVIER SCIENCE SA	LAUSANNE	PO BOX 564, 1001 LAUSANNE, SWITZERLAND	1572-6657	1873-2569		J ELECTROANAL CHEM	J. Electroanal. Chem.	2023-09-15	2016	777
J	Veseli, A; Mullallari, F; Balidemaj, F; Berisha, L; Svorc, L; Arbneshi, T				Veseli, Albana; Mullallari, Ferdane; Balidemaj, Festina; Berisha, Liridon; Svorc, L'ubomir; Arbneshi, Tahir			Electrochemical determination of erythromycin in drinking water resources by surface modified screen-printed carbon electrodes	MICROCHEMICAL JOURNAL			English	Article						Erythromycin; Sodium dodecyl sulfate; Flow injection analysis; Amperometric detection	LIQUID-CHROMATOGRAPHY; SENSOR; ANTIBIOTICS	Erythromycin (ERY) belongs to a class of antibiotics that is one of the prior drinking water contaminants according to the latest European Union Water Framework Directive (EU - WDF). Therefore, the main goal of this study was to develop a new and sensitive analytical method for quantitative determination of ERY based on the use of screen-printed carbon electrodes (SPCEs) modified with sodium dode…	[Veseli, Albana; Mullallari, Ferdane; Berisha, Liridon; Arbneshi, Tahir] Univ Prishtina Hasan Prishtina George Bush, Fac Nat & Math Sci, Prishtina 10000, Kosovo; [Balidemaj, Festina] Northwestern Hlth Sci Univ, Bloomington, MN USA; [Svorc, L'ubomir] Slovak Univ Technol Bratislava, Fac Chem & Food Technol, Inst Analyt Chem, Radlinskeho 9, SK-81237 Bratislava, Slovakia	Slovak University of Technology Bratislava	Arbneshi, T (corresponding author), Univ Prishtina Hasan Prishtina George Bush, Fac Nat & Math Sci, Prishtina 10000, Kosovo.	tahir.arbneshi@uni-pr.edu	Berisha, Liridon/HHC-9199-2022; Švorc, Ľubomír/AAD-3658-2019; Balidemaj, Festina/AAY-8121-2021; Berisha, Liridon/AAR-9030-2021	Švorc, Ľubomír/0000-0002-9588-8609; Balidemaj, Festina/0000-0002-6198-9823; Berisha, Liridon/0000-0003-3516-0314	Ministry of Education, Science and Technology [2-5521-3]; Grant Agency of the Slovak Republic [1/0489/16]	Ministry of Education, Science and Technology(Ministry of Education, Science & Technology (MEST), Republic of Korea); Grant Agency of the Slovak Republic	We thank the Ministry of Education, Science and Technology for financial support (Project No. 2-5521-3). LS wishes to acknowledge the Grant Agency of the Slovak Republic (Grant No. 1/0489/16).		21	15	15	5	48	ELSEVIER	AMSTERDAM	RADARWEG 29, 1043 NX AMSTERDAM, NETHERLANDS	0026-265X	1095-9149		MICROCHEM J	Microchem J.	JUL	2019	148
J	Hsu, L; Deen, MJ; Selvaganapathy, PR				Hsu, Leo; Deen, M. Jamal; Selvaganapathy, P. Ravi			Complete Solid State Dissolved Oxygen Sensor Using Hemin Electrocatalyst and Palladium-Reusable Reference Electrode	IEEE SENSORS JOURNAL			English	Article						Dissolved oxygen; electrochemical sensor; palladium reference electrode; Hemin electrocatalyst; solid state	GLASSY-CARBON ELECTRODE; REDUCED GRAPHENE OXIDE; LIQUID-JUNCTION; TETRASULFONATED PHTHALOCYANINE; AMPEROMETRIC SENSOR; FILM; REMOVAL; POLYMER	Dissolved oxygen (DO) is essential for aquatic life, but is consumed during the decomposition process of the organic matter in water. It is used as a primary indicator of water quality, and is also crucial for the efficiency of the waste water treatment process. Hence, a sensitive, long term reliable, in-line DO sensor is essential for sustainability of water ecosystems and management of water re…	[Hsu, Leo] McMaster Univ, Sch Biomed Engn, Hamilton, ON L8S 4L8, Canada; [Hsu, Leo] Tufts Univ, Dept Biomed Engn, Medford, MA 02155 USA; [Deen, M. Jamal] McMaster Univ, Sch Biomed Engn, Dept Elect Engn, Hamilton, ON L8S 4L8, Canada; [Selvaganapathy, P. Ravi] McMaster Univ, Sch Biomed Engn, Dept Mech Engn, Hamilton, ON L8S 4L8, Canada	McMaster University; Tufts University; McMaster University; McMaster University	Selvaganapathy, PR (corresponding author), McMaster Univ, Sch Biomed Engn, Dept Mech Engn, Hamilton, ON L8S 4L8, Canada.	selvaga@mcmaster.ca	Hsu, Huan-Hsuan/AAA-3585-2021; Deen, M. Jamal/A-7567-2008	Hsu, Huan-Hsuan/0000-0001-9455-6816; Deen, M. Jamal/0000-0002-6390-0933	Ontario Ministry of Research and Innovation; Canada Research Chairs Program; Natural Science and Research Council of Canada; RESEAU network; IC-IMPACTS network	Ontario Ministry of Research and Innovation(Ministry of Research and Innovation, Ontario); Canada Research Chairs Program(Canada Research Chairs); Natural Science and Research Council of Canada; RESEAU network; IC-IMPACTS network	This work was supported in part by the Ontario Ministry of Research and Innovation through the Ontario Research Fund, in part by the Canada Research Chairs Program, in part by the Natural Science and Research Council of Canada through the Discovery Program, and in part by RESEAU and IC-IMPACTS networks.		36	1	1	2	49	IEEE-INST ELECTRICAL ELECTRONICS ENGINEERS INC	PISCATAWAY	445 HOES LANE, PISCATAWAY, NJ 08855-4141 USA	1530-437X	1558-1748		IEEE SENS J	IEEE Sens. J.	2023-02-01	2018	18	3
J	Beck, E; Kirkwood, W; Caress, D; Berk, T; Mahacek, P; Brashem, K; Acain, J; Reddy, V; Kitts, C; Skutnik, J; Wheat, G				Beck, Erin; Kirkwood, William; Caress, David; Berk, Todd; Mahacek, Paul; Brashem, Kevin; Acain, Jose; Reddy, Vivek; Kitts, Christopher; Skutnik, John; Wheat, Geoff			SeaWASP: A Small Waterplane Area Twin Hull Autonomous Platform for Shallow Water Mapping	MARINE TECHNOLOGY SOCIETY JOURNAL			English	Article								Students with Santa Clara University (SCU) and the Monterey Bay Aquarium Research Institute (MBARI) are developing an innovative platform for shallow water bathymetry. Bathymetry data is used to analyze the geography, ecosystem, and health of marine habitats. Current methods for shallow water measurements typically involve large manned vessels that are costly to operate and that may pose a danger…	[Berk, Todd; Mahacek, Paul; Brashem, Kevin; Acain, Jose; Reddy, Vivek; Kitts, Christopher] Santa Clara Univ, Santa Clara, CA 95053 USA; [Beck, Erin; Kirkwood, William; Caress, David] Monterey Bay Aquarium Res Inst, Monterey, CA USA; [Skutnik, John; Wheat, Geoff] Univ Alaska Fairbanks, Fairbanks, AK USA	Santa Clara University; Monterey Bay Aquarium Research Institute; University of Alaska System; University of Alaska Fairbanks	Beck, E (corresponding author), Santa Clara Univ, Santa Clara, CA 95053 USA.		Caress, David W./Q-7173-2019	Caress, David W./0000-0002-6596-9133					12	10	10	1	16	MARINE TECHNOLOGY SOC INC	COLUMBIA	5565 STERRETT PLACE, STE 108, COLUMBIA, MD 21044 USA	0025-3324			MAR TECHNOL SOC J	Mar. Technol. Soc. J.		2009	43	1
J	Cohen, A; Pillarisetti, A; Luo, Q; Zhang, Q; Li, HX; Zhong, GM; Zhu, G; Colford, JM; Smith, KR; Ray, I; Tao, Y				Cohen, Alasdair; Pillarisetti, Ajay; Luo, Qing; Zhang, Qi; Li, Hongxing; Zhong, Gemei; Zhu, Gang; Colford, John M., Jr.; Smith, Kirk R.; Ray, Isha; Tao, Yong			Boiled or Bottled: Regional and Seasonal Exposures to Drinking Water Contamination and Household Air Pollution in Rural China	ENVIRONMENTAL HEALTH PERSPECTIVES			English	Article							MICROBIOLOGICAL EFFECTIVENESS; DEVELOPING-COUNTRIES; MULTIDIMENSIONAL POVERTY; DISINFECTING WATER; SOLID FUELS; COOKING; COST; PERFORMANCE; DISEASE; BURDEN	BACKGROUND: Inadequate access to safe drinking water remains a global health problem, particularly in rural areas. Boiling is the most commonly used form of point-of-use household water treatment (HWT) globally, although the use of bottled water in low- and middle-income countries (LMICs) is increasing rapidly. OBJECTIVES: We assessed the regional and seasonal prevalence of HWT practices (includi…	[Cohen, Alasdair] Virginia Polytech Inst & State Univ Virginia Tech, Dept Populat Hlth Sci, Publ Hlth Program, Blacksburg, VA USA; [Pillarisetti, Ajay] Emory Univ, Rollins Sch Publ Hlth, Gangarosa Dept Environm Hlth, Atlanta, GA USA; [Luo, Qing; Zhang, Qi; Li, Hongxing; Tao, Yong] Chinese Ctr Dis Control & Prevent CDC, Nat Ctr Rural Water Supply Tech Guidance, Beijing, Peoples R China; [Zhong, Ge…	Virginia Polytechnic Institute & State University; Emory University; Rollins School Public Health; Chinese Center for Disease Control & Prevention; University of California System; University of California Berkeley; University of California System; University of California Berkeley; University of California System; University of California Berkeley	Cohen, A (corresponding author), Virginia Polytech Inst & State Univ, Dept Populat Hlth Sci, Publ Hlth Program, 205 Duck Pond Dr, Blacksburg, VA 24061 USA.	alasdair.cohen@linacre.oxon.org			U.S. Environmental Protection Agency [91744201-0]; International Fund for Agricultural Development, a specialized United Nations agency; China CDC	U.S. Environmental Protection Agency(United States Environmental Protection Agency); International Fund for Agricultural Development, a specialized United Nations agency; China CDC	We thank the Chinese Center for Disease Control and Prevention (China CDC) staff in Guangxi and Henan as well as Z. Yang at UNICEF-China, the ERG Water Group, B. Arnold, P. Gochyyev, A. Hubbard, V. Resh, and J. Romm at UC Berkeley, and T. Rath at IFAD. Funding and support for this research was provided by the U.S. Environmental Protection Agency (https://www.epa.gov; STAR Fellowship 91744201-0) a…		69	11	11	2	28	US DEPT HEALTH HUMAN SCIENCES PUBLIC HEALTH SCIENCE	RES TRIANGLE PK	NATL INST HEALTH, NATL INST ENVIRONMENTAL HEALTH SCIENCES, PO BOX 12233, RES TRIANGLE PK, NC 27709-2233 USA	0091-6765	1552-9924		ENVIRON HEALTH PERSP	Environ. Health Perspect.	DEC	2020	128	12
J	Hu, JF; Sedki, M; Shen, Y; Mulchandani, A; Gao, GW				Hu, Jingfang; Sedki, Mohammed; Shen, Yu; Mulchandani, Ashok; Gao, Guowei			Chemiresistor sensor based on ion-imprinted polymer (IIP)-functionalized rGO for Cd(II) ions in water	SENSORS AND ACTUATORS B-CHEMICAL			English	Article						Ion imprinted polymer (IIP); rGO; Chemiresistor; Heavy metals; Field-effect transistor (FET)	SENSITIVE DETECTION; CADMIUM; BLOOD; LEAD; ELECTRODE; IMPACT; URINE	This study reports the design and development of a novel chemiresistor (CR) sensor using ion imprinted polymer (IIP)-functionalized reduced graphene oxide (rGO) [IIP/rGO-CR] for cadmium ions (Cd(II)) determination in water. The sensor consisted of a CR transducer made of rGO channel bridging source and drain electrodes prepared by self-assembly and thermal reduction of graphene oxide (GO) on Au i…	[Hu, Jingfang; Gao, Guowei] Beijing Informat Sci & Technol Univ, Beijing Key Lab Sensor, Beijing 100101, Peoples R China; [Hu, Jingfang; Shen, Yu; Mulchandani, Ashok] Univ Calif Riverside, Dept Chem & Environm Engn, Riverside, CA 92521 USA; [Hu, Jingfang; Gao, Guowei] Beijing Informat Sci & Technol Univ, Key Lab Modern Measurement & Control Technol, Minist Educ, Beijing 100192, Peoples R China; […	Beijing Information Science & Technology University; University of California System; University of California Riverside; Beijing Information Science & Technology University; Chinese Academy of Sciences; Shanghai Institute of Microsystem & Information Technology, CAS; University of California System; University of California Riverside; University of California System; University of California Riv…	Hu, JF (corresponding author), Beijing Informat Sci & Technol Univ, Beijing Key Lab Sensor, Beijing 100101, Peoples R China.;Hu, JF; Mulchandani, A (corresponding author), Univ Calif Riverside, Dept Chem & Environm Engn, Riverside, CA 92521 USA.	jfhu@bistu.edu.cn; adani@engr.ucr.edu			US Department of Energy [FE0030456]; W. Ruel Johnson Chair in Environmental Engineering; National Natural Science Foundation of China [61601037, 61701475]; Development and Improvement of Scientific Research Level Program of Beijing Information and Science University [2019KYNH222]	US Department of Energy(United States Department of Energy (DOE)); W. Ruel Johnson Chair in Environmental Engineering; National Natural Science Foundation of China(National Natural Science Foundation of China (NSFC)); Development and Improvement of Scientific Research Level Program of Beijing Information and Science University	We acknowledge financial supports from the US Department of Energy (award number FE0030456) and W. Ruel Johnson Chair in Environmental Engineering to AM and National Natural Science Foundation of China (No. 61601037, No. 61701475) and Development and Improvement of Scientific Research Level Program of Beijing Information and Science University (No. 2019KYNH222) to JH.		40	9	9	10	58	ELSEVIER SCIENCE SA	LAUSANNE	PO BOX 564, 1001 LAUSANNE, SWITZERLAND		0925-4005		SENSOR ACTUAT B-CHEM	Sens. Actuator B-Chem.	2023-11-01	2021	346
J	Rijal, S; Zhang, XD; Jia, XH				Rijal, Santosh; Zhang, Xiaodong; Jia, Xinhua			Estimating Surface Soil Water Content in the Red River Valley of the North using Landsat 5 TM Data	SOIL SCIENCE SOCIETY OF AMERICA JOURNAL			English	Article							MOISTURE CONTENT; ROOT-ZONE; SUBSURFACE DRAINAGE; NEAR-SURFACE; SAR DATA; REMOTE; REFLECTANCE; RETRIEVAL; RADAR; FIELD	Due to poor drainage and flat terrain, a prolonged wet cycle since the early 1990s in the Red River Valley (RRV) of the North has caused frequent flooding in most farmland, delaying or even preventing spring planting. To combat high soil water content, farmers have adopted tile drainage practices. To schedule crop planting or to evaluate the efficiency of tile drainage and its potential impacts o…	[Rijal, Santosh] So Illinois Univ, Environ Resources & Policy Program, Carbondale, IL 62901 USA; [Rijal, Santosh; Zhang, Xiaodong] Univ N Dakota, Dep Earth Syst Sci & Policy, Grand Forks, ND 58202 USA; [Jia, Xinhua] N Dakota State Univ, Dept Agr & Biosyst Engn, Fargo, ND 58108 USA	Southern Illinois University System; Southern Illinois University; University of North Dakota Grand Forks; North Dakota State University Fargo	Zhang, XD (corresponding author), Univ N Dakota, Dep Earth Syst Sci & Policy, Grand Forks, ND 58202 USA.	zhang@aero.und.edu			USDA [2008-35102-19253]; NASA [NNX09AQ81G, NNX07AK91A]; NSF [EPS-081442]; EPSCoR; Office Of The Director [0814442] Funding Source: National Science Foundation; NASA [NNX09AQ81G, 104040] Funding Source: Federal RePORTER	USDA(United States Department of Agriculture (USDA)); NASA(National Aeronautics & Space Administration (NASA)); NSF(National Science Foundation (NSF)); EPSCoR; Office Of The Director(National Science Foundation (NSF)NSF - Office of the Director (OD)); NASA(National Aeronautics & Space Administration (NASA))	We thank the funding support for this project by USDA 2008-35102-19253, NASA NNX09AQ81G and NNX07AK91A, and NSF EPS-081442. The comments by two anonymous reviewers and by the associate editor, Dr. Ole Wendroth have greatly improved the manuscript.		69	10	12	1	48	WILEY	HOBOKEN	111 RIVER ST, HOBOKEN 07030-5774, NJ USA	0361-5995	1435-0661		SOIL SCI SOC AM J	Soil Sci. Soc. Am. J.	JUL-AUG	2013	77	4
J	Zheng, GH; Li, SY; Zhang, T; Zhu, FY; Sun, J; Li, SJ; You, LF				Zheng, Guihua; Li, Shiyao; Zhang, Ting; Zhu, Feiyun; Sun, Jing; Li, Shuangjiang; You, Linfeng			Water Pollution Control and Treatment Based on Quantum Dot Chemical and Biological High-Sensitivity Sensing	JOURNAL OF SENSORS			English	Article							AQUEOUS SYNTHESIS; GRAPHENE	Inorganic pollutants in water can have an important impact on ecosystems and human health, so the development of rapid and sensitive detection methods for typical inorganic pollutants in water samples is important for understanding the pollution status of the water environment, as well as water pollution prevention and protection of drinking water safety. Fluorescence sensing technology has the a…	[Zheng, Guihua; Li, Shiyao; Zhang, Ting; Zhu, Feiyun; Sun, Jing; Li, Shuangjiang; You, Linfeng] Chengdu Technol Univ, Sch Mat & Environm Engn, Chengdu 611730, Sichuang, Peoples R China	Chengdu Technological University	Zheng, GH (corresponding author), Chengdu Technol Univ, Sch Mat & Environm Engn, Chengdu 611730, Sichuang, Peoples R China.	20143157@stu.nun.edu.cn; 1064748643@qq.com; 2621008460@qq.com; 2106641709@qq.com; 359539626@qq.com; 1476067949@qq.com; 381725615@qq.com	Linfeng, You/P-7240-2018		Fundamental Research for Talent Introduction of Chengdu Technological University [2020RC007]	Fundamental Research for Talent Introduction of Chengdu Technological University	This work is supported by the Fundamental Research for Talent Introduction of Chengdu Technological University (2020RC007).		20	4	4	2	16	HINDAWI LTD	LONDON	ADAM HOUSE, 3RD FLR, 1 FITZROY SQ, LONDON, W1T 5HF, ENGLAND	1687-725X	1687-7268		J SENSORS	J. Sens.	2023-10-28	2021	2021
J	Yin, HL; Wang, Y; Yang, Y; Huang, JS; Xu, ZX				Yin, Hailong; Wang, Yue; Yang, Yang; Huang, Jingshui; Xu, Zuxin			Tryptophan-like fluorescence as a fingerprint of dry-weather misconnections into storm drainage system	ENVIRONMENTAL SCIENCES EUROPE			English	Article						Storm drainage system; Dry-weather misconnection; River water intrusion; Fluorescence spectroscopy; Bayesian mass balance model	DISSOLVED ORGANIC-MATTER; TEXTILE WASTE-WATER; PARALLEL FACTOR-ANALYSIS; PERSONAL CARE PRODUCTS; LOW-COST OPTIONS; SURFACE-WATER; ARTIFICIAL SWEETENERS; EXCITATION; IDENTIFICATION; POLLUTION	Background Inappropriate dry-weather misconnections into storm drainage system are a demanding environmental problem worldwide, which leads to unexpected dry-weather discharge into surface waters. It often costs a large amount of manpower and resources to identify the source of misconnections and estimate its contributions. In this study, we evaluated the possibility of quantifying proportional s…	[Yin, Hailong; Wang, Yue; Xu, Zuxin] Tongji Univ, Minist Educ, Key Lab Yangtze River Water Environm, Shanghai 200092, Peoples R China; [Yin, Hailong; Wang, Yue; Xu, Zuxin] Tongji Univ, State Key Lab Pollut Control & Resource Reuse, Shanghai 200092, Peoples R China; [Yin, Hailong; Xu, Zuxin] Shanghai Inst Pollut Control & Ecol Secur, Shanghai 200092, Peoples R China; [Yang, Yang] Danish Hydraul In…	Tongji University; Tongji University; Helmholtz Association; Helmholtz Center for Environmental Research (UFZ)	Xu, ZX (corresponding author), Tongji Univ, Minist Educ, Key Lab Yangtze River Water Environm, Shanghai 200092, Peoples R China.;Xu, ZX (corresponding author), Tongji Univ, State Key Lab Pollut Control & Resource Reuse, Shanghai 200092, Peoples R China.;Xu, ZX (corresponding author), Shanghai Inst Pollut Control & Ecol Secur, Shanghai 200092, Peoples R China.;Huang, JS (corresponding author), Hel…	huangjingshui@126.com; xzx@stcsm.gov.cn		yin, hailong/0000-0002-4112-3731; Huang, Jingshui/0000-0001-6313-0230	National Natural Science Foundation of China [51979195]	National Natural Science Foundation of China(National Natural Science Foundation of China (NSFC))	This study was financially supported by National Natural Science Foundation of China (Grant no. 51979195).		54	15	15	4	51	SPRINGER	NEW YORK	ONE NEW YORK PLAZA, SUITE 4600, NEW YORK, NY, UNITED STATES	2190-4707	2190-4715		ENVIRON SCI EUR	Environ. Sci Eur.	2023-04-09	2020	32	1
J	Wan, CL; Qu, AX; Deng, LY; Liu, X; Wu, CY				Wan, Chunli; Qu, Aoxuan; Deng, Liyan; Liu, Xiang; Wu, Changyong			Preparation of electrochemical sensor based on glassy carbon electrode and its specificity and sensitivity for directional detection of antibiotic resistance genes spreading in the water environment	ENVIRONMENTAL SCIENCE AND POLLUTION RESEARCH			English	Article; Early Access						Antibiotic resistance genes; Electrochemical sensor; Glassy carbon electrode; Specificity; Sensitivity	DNA BIOSENSOR; DISCRIMINATION; IMMOBILIZATION; NANOPARTICLES; MECHANISMS; APTAMER; SURFACE; ACID	Antibiotic-resistant bacteria/resistance genes (ARB/ARGs) have been paid much attention due to the environmental risks they might bring. They were demonstrated to be widespread in surface water and wastewater. Determining the concentrations of ARGs is the first step to evaluate the degree of pollution. In this study, electrochemical detection technology was studied due to its advantages of low co…	[Wan, Chunli; Qu, Aoxuan; Liu, Xiang] Fudan Univ, Dept Environm Sci & Engn, Shanghai 200433, Peoples R China; [Qu, Aoxuan] Shanghai Chengtou Environm Ecol Restorat Technol, Shanghai 200232, Peoples R China; [Deng, Liyan; Wu, Changyong] Chinese Res Inst Environm Sci, Res Ctr Environm Pollut Control Technol, Beijing 100012, Peoples R China	Fudan University	Wu, CY (corresponding author), Chinese Res Inst Environm Sci, Res Ctr Environm Pollut Control Technol, Beijing 100012, Peoples R China.	changyongwu@126.com	Liu, Xiang/N-6195-2019; Wan, Chunli/C-8351-2016	Liu, Xiang/0000-0003-1250-2211; Wan, Chunli/0000-0002-6027-4869	National Natural Science Foundation of China [42077213]; Natural Science Foundation of Shanghai [20ZR1406100]; National Key R&D Program of China [2020YFC1806302]	National Natural Science Foundation of China(National Natural Science Foundation of China (NSFC)); Natural Science Foundation of Shanghai(Natural Science Foundation of Shanghai); National Key R&D Program of China	This work was supported by the National Natural Science Foundation of China (No. 42077213), the Natural Science Foundation of Shanghai (No. 20ZR1406100), and the National Key R&D Program of China (No. 2020YFC1806302).		40	0	0	15	34	SPRINGER HEIDELBERG	HEIDELBERG	TIERGARTENSTRASSE 17, D-69121 HEIDELBERG, GERMANY	0944-1344	1614-7499		ENVIRON SCI POLLUT R	Environ. Sci. Pollut. Res.	2022-09-01	2022
J	Carstea, EM; Popa, CL; Baker, A; Bridgeman, J				Carstea, Elfrida M.; Popa, Cristina L.; Baker, Andy; Bridgeman, John			In situ fluorescence measurements of dissolved organic matter: A review	SCIENCE OF THE TOTAL ENVIRONMENT			English	Review						Field fluorimeters; Surface water; Groundwater; Engineered water systems; Dissolved organic matter	WASTE-WATER TREATMENT; TRYPTOPHAN-LIKE FLUORESCENCE; DRINKING-WATER; TREATMENT SYSTEMS; OPTICAL SENSORS; MICROBIAL QUALITY; METAL-IONS; SPECTROSCOPY; CARBON; TEMPERATURE	There is a need for an inexpensive, reliable and fast monitoring tool to detect contaminants in a short time, for quick mitigation of pollution sources and site remediation, and for characterization of natural dissolved organic matter (DOM). Fluorescence spectroscopy has proven to be an excellent technique in quantifying aquatic DOM, from autochthonous, allochthonous or anthropogenic sources. Thi…	[Carstea, Elfrida M.; Popa, Cristina L.] Natl Inst R&D Optoelect, Atomistilor 409, Magurele 077125, Romania; [Baker, Andy] UNSW Sydney, Connected Waters Initiat Res Ctr, Sydney, NSW 2052, Australia; [Bridgeman, John] Univ Bradford, Fac Engn & Informat, Richmond Rd, Bradford BD7 1DP, W Yorkshire, England	National Research & Development Institute Optoelectronics INOE 2000; University of New South Wales Sydney; University of Bradford	Carstea, EM (corresponding author), Natl Inst R&D Optoelect INOE 2000, Atomistilor 409, Magurele 077125, Romania.	elfrida.carstea@inoe.ro; cristina.popa@inoe.ro; a.baker@unsw.edu.au; j.bridgeman@bradford.ac.uk	Carstea, Elfrida M/B-5822-2011; , Elfrida Carstea/D-8552-2014; Baker, Andy/O-5362-2019; Bridgeman, John/HZK-7496-2023; Popa, Cristina Liana/Z-4612-2019; Bridgeman, John/L-9180-2015	, Elfrida Carstea/0000-0002-9065-1602; Baker, Andy/0000-0002-1552-6166; Popa, Cristina Liana/0000-0002-3203-3945; Bridgeman, John/0000-0001-8348-5004	Ministry of Research and Innovation, CNCS-UEFISCDI within PNCDI III under the Core Program OPTRONICA VI [PN-III-P1-1.1-TE-2016-0646, 18N/2019, 19PFE/17.10.2018, 152/2016, SMIS 108109]; EPSRC [EP/I001379/1] Funding Source: UKRI	Ministry of Research and Innovation, CNCS-UEFISCDI within PNCDI III under the Core Program OPTRONICA VI(Consiliul National al Cercetarii Stiintifice (CNCS)Unitatea Executiva pentru Finantarea Invatamantului Superior, a Cercetarii, Dezvoltarii si Inovarii (UEFISCDI)); EPSRC(UK Research & Innovation (UKRI)Engineering & Physical Sciences Research Council (EPSRC))	Authors, E.M. Carstea and C.L. Popa, acknowledge the support of the Ministry of Research and Innovation, CNCS-UEFISCDI, project number PN-III-P1-1.1-TE-2016-0646, within PNCDI III, project number 18N/2019, under the Core Program OPTRONICA VI, project number 19PFE/17.10.2018 and project number 152/2016, SMIS 108109. The graphical abstract was prepared using Mind the Graph.		125	74	77	30	345	ELSEVIER	AMSTERDAM	RADARWEG 29, 1043 NX AMSTERDAM, NETHERLANDS	0048-9697	1879-1026		SCI TOTAL ENVIRON	Sci. Total Environ.	2023-01-10	2020	699
J	Yeoh, S; Matjafri, MZ; Mutter, KN; Oglat, AA				Yeoh, S.; Matjafri, M. Z.; Mutter, K. N.; Oglat, Ammar A.			Plastic fiber evanescent sensor in measurement of turbidity	SENSORS AND ACTUATORS A-PHYSICAL			English	Article						Turbidity; Optical fiber sensor; Tracepro software; Water quality monitoring	WATER-QUALITY DATA; PROBES	The construction and working principles of a plastic fiber sensor for examining the level of turbidity is studied in this paper. This work focuses on designing an inexpensive turbidity sensor that incorporates a pair of multimode fibers (MMF) that are attached side by side and their beveled tips are mounted vertically. The efficiency of different beveled angles is evaluated by simulation with Tra…	[Yeoh, S.; Matjafri, M. Z.; Mutter, K. N.; Oglat, Ammar A.] Univ Sains Malaysia, Sch Phys, George Town 11800, Malaysia	Universiti Sains Malaysia	Oglat, AA (corresponding author), Univ Sains Malaysia, Sch Phys, George Town 11800, Malaysia.	ammar.oglat@yahoo.com	Oglat, Ammar A./O-3112-2018; MatJafri, Mohd Zubir/F-6340-2010; Oglat, Ammar A./O-3344-2019	Oglat, Ammar A./0000-0002-7907-6889; MatJafri, Mohd Zubir/0000-0001-9313-7548; Oglat, Ammar A./0000-0002-7907-6889	[304/PFIZIK/6315023]		This research study was supported by Prof. Dr. Mohammad Zubir Mat Jafri, under the grant number 304/PFIZIK/6315023. We thank our colleagues from Universiti Sains Malaysia, School of physics who provided insight and expertise that greatly assisted the research, although they may not agree with all of the interpretations of this paper.		22	11	14	1	26	ELSEVIER SCIENCE SA	LAUSANNE	PO BOX 564, 1001 LAUSANNE, SWITZERLAND	0924-4247			SENSOR ACTUAT A-PHYS	Sens. Actuator A-Phys.	2023-01-01	2019	285
J	Chakraborty, U; Garg, P; Bhanjana, G; Kaur, G; Kaushik, A; Chaudhary, GR				Chakraborty, Urmila; Garg, Preeti; Bhanjana, Gaurav; Kaur, Gurpreet; Kaushik, Ajeet; Chaudhary, Ganga Ram			Spherical silver oxide nanoparticles for fabrication of electrochemical sensor for efficient 4-Nitrotoluene detection and assessment of their antimicrobial activity	SCIENCE OF THE TOTAL ENVIRONMENT			English	Article						Spherical Ag2O nanoparticles; 4-nitrotoluene (4-NT); Electrochemical sensor; Microwave synthesis	CARBON NANOTUBES; 4-NITROPHENOL; NITROTOLUENE; NITROBENZENE; FLUORESCENCE; WATER	This research article reports an economic and affordable microwave-assisted synthesis of spherical silver oxide nanoparticles (Ag2O NPs) (80-90 nm) for an efficient electrochemical sensing of a hazardous organic pollutant 4-nitrotoluene (4-NT). Such well-characterized Ag2O NPs were utilized to modify gold (Au) electrode in order to fabricate Ag2O-NPs/Au sensor to detect 4-NT using cyclic voltamme…	[Chakraborty, Urmila; Bhanjana, Gaurav; Kaur, Gurpreet; Chaudhary, Ganga Ram] Panjab Univ Chandigarh, Dept Chem, Chandigarh 160014, India; [Chakraborty, Urmila; Bhanjana, Gaurav; Kaur, Gurpreet; Chaudhary, Ganga Ram] Panjab Univ Chandigarh, Ctr Adv Studies Chem, Chandigarh 160014, India; [Garg, Preeti; Chaudhary, Ganga Ram] Panjab Univ Chandigarh, Sophisticated Analyt Instrumentat Facil SAIF CIL,…	Panjab University; Panjab University; Panjab University; Florida Polytechnical University	Kaur, G (corresponding author), Panjab Univ Chandigarh, Dept Chem, Chandigarh 160014, India.;Kaur, G (corresponding author), Panjab Univ Chandigarh, Ctr Adv Studies Chem, Chandigarh 160014, India.	gurpreet14@pu.ac.in	Kaushik, Ajeet Kuamr/K-1289-2018	Kaushik, Ajeet Kuamr/0000-0003-4206-1541; Chaudhary, Ganga Ram/0000-0003-0501-6071; Kaur, Gurpreet/0000-0002-8985-3186	University Grants Commission (UGC), India [194-2/2016(IC)]; Department of Science and Technology, India [IFA-12-CH41]; Council of Scientific and Industrial Research, India [09/135(0764)/2017-EMR-I]; UGC [F.4-2/2006 (BSR)/EN/18-19/0005]	University Grants Commission (UGC), India(University Grants Commission, India); Department of Science and Technology, India(Department of Science & Technology (India)); Council of Scientific and Industrial Research, India(Council of Scientific & Industrial Research (CSIR) - India); UGC(University Grants Commission, India)	GRC and AK acknowledge the support of University Grants Commission (UGC), India under 21st Century Knowledge Initiative Project (F.No.194-2/2016(IC)). GK is thankful to Department of Science and Technology, India for Inspire Faculty Award (IFA-12-CH41). UC would like to thank the financial support from Council of Scientific and Industrial Research, India in the form of senior research fellowship …		51	6	6	6	22	ELSEVIER	AMSTERDAM	RADARWEG 29, 1043 NX AMSTERDAM, NETHERLANDS	0048-9697	1879-1026		SCI TOTAL ENVIRON	Sci. Total Environ.	2023-02-20	2022	808
S	Alahi, MEE; Li, X; Mukhopadhyay, S; Burkitt, L		Mukhopadhyay, SC; Postolache, OA; Jayasundera, KP; Swain, AK		Alahi, Md Eshrat E.; Li, Xie; Mukhopadhyay, Subhas; Burkitt, L.			Application of Practical Nitrate Sensor Based on Electrochemical Impedance Spectroscopy	SENSORS FOR EVERYDAY LIFE: ENVIRONMENTAL AND FOOD ENGINEERING	Smart Sensors Measurement and Instrumentation		English	Article; Book Chapter							SPECTROPHOTOMETRIC DETERMINATION; INTERDIGITAL SENSORS; CORROSION BEHAVIOR; AQUEOUS-SOLUTION; NITRITE; DERIVATIZATION; NITROGEN; SYSTEM; QUANTIFICATION; SPECIATION	Nitrate is a naturally occurring ionic compound that is part of nature's nitrogen cycle. Nitrates are readily lost to ground and surface water as a result of intensive agriculture, disposal of human and animal sewage and industrial wastes and the impact of elevated nitrate concentrations on water quality, has been identified as a critical issue facing New Zealand's future. It is therefore, highly…	[Alahi, Md Eshrat E.; Li, Xie; Mukhopadhyay, Subhas; Burkitt, L.] Massey Univ, Palmerston North, New Zealand	Massey University	Mukhopadhyay, S (corresponding author), Massey Univ, Palmerston North, New Zealand.	S.C.Mukhopadhyay@massey.ac.nz	Mukhopadhyay, Subhas/AAJ-5336-2020; Alahi, Md Eshrat E/S-6829-2017	Mukhopadhyay, Subhas/0000-0002-8600-5907; Alahi, Md Eshrat E/0000-0002-2721-5146; Burkitt, Lucy/0000-0002-2702-5764					58	7	7	0	2	SPRINGER INTERNATIONAL PUBLISHING AG	CHAM	GEWERBESTRASSE 11, CHAM, CH-6330, SWITZERLAND	2194-8402		978-3-319-47322-2; 978-3-319-47321-5	SMART SENSOR MEAS IN			2017	23
J	Capella, JV; Bonastre, A; Ors, R; Peris, M				Capella, J. V.; Bonastre, Alberto; Ors, Rafael; Peris, Miguel			A New Application of Internet of Things and Cloud Services in Analytical Chemistry: Determination of Bicarbonate in Water	SENSORS			English	Article						smart sensors; cloud services; Internet of Things; bicarbonate; water analysis	SENSOR; QUALITY; NITRATE	In a constantly evolving world, new technologies such as Internet of Things (IoT) and cloud-based services offer great opportunities in many fields. In this paper we propose a new approach to the development of smart sensors using IoT and cloud computing, which open new interesting possibilities in analytical chemistry. According to IoT philosophy, these new sensors are able to integrate the gene…	[Capella, J. V.; Bonastre, Alberto; Ors, Rafael] Univ Politecn Valencia, Inst ITACA, Ciutat Politecn Innovacio, Camino Vera S-N, E-46022 Valencia, Spain; [Peris, Miguel] Univ Politecn Valencia, Dept Chem, Camino Vera S-N, E-46022 Valencia, Spain	Universitat Politecnica de Valencia; Universitat Politecnica de Valencia	Bonastre, A (corresponding author), Univ Politecn Valencia, Inst ITACA, Ciutat Politecn Innovacio, Camino Vera S-N, E-46022 Valencia, Spain.;Peris, M (corresponding author), Univ Politecn Valencia, Dept Chem, Camino Vera S-N, E-46022 Valencia, Spain.	jcapella@itaca.upv.es; bonastre@itaca.upv.es; rors@itaca.upv.es; mperist@qim.upv.es	Bonastre Pina, Alberto Miguel/N-3653-2015; Capella, Juan V./P-7656-2014	Bonastre Pina, Alberto Miguel/0000-0003-3639-8420; Capella, Juan V./0000-0003-3879-9826	Spanish Ministerio de Economia y Competitividad [DPI2016-80303-C2-1-P]	Spanish Ministerio de Economia y Competitividad(Spanish Government)	This research was funded by the Spanish Ministerio de Economia y Competitividad, grant number DPI2016-80303-C2-1-P.		27	7	7	0	15	MDPI	BASEL	ST ALBAN-ANLAGE 66, CH-4052 BASEL, SWITZERLAND		1424-8220		SENSORS-BASEL	Sensors	2023-12-02	2019	19	24
J	Islam, MS; Sun, XY; Wang, Z; Cheng, IE				Islam, M. D. Samiul; Sun, Xinyao; Wang, Zheng; Cheng, Irene			FAPNET: Feature Fusion with Adaptive Patch for Flood-Water Detection and Monitoring	SENSORS			English	Article						flood-water mapping; waterbody detection; satellite image analysis; image segmentation; SAR imagery	FULLY CONVOLUTIONAL NETWORKS; SAR IMAGE CLASSIFICATION; SEMANTIC SEGMENTATION; NEURAL-NETWORK; RESOLUTION; NET	In satellite remote sensing applications, waterbody segmentation plays an essential role in mapping and monitoring the dynamics of surface water. Satellite image segmentation-examining a relevant sensor data spectrum and identifying the regions of interests to obtain improved performance-is a fundamental step in satellite data analytics. Satellite image segmentation is challenging for a number of…	[Islam, M. D. Samiul; Sun, Xinyao; Cheng, Irene] Univ Alberta, Multimedia Res Ctr, Edmonton, AB T6G 2E8, Canada; [Wang, Zheng] 3vGeomat Inc, Vancouver, BC V5Y 0M6, Canada	University of Alberta	Islam, MS (corresponding author), Univ Alberta, Multimedia Res Ctr, Edmonton, AB T6G 2E8, Canada.	mdsamiul@ualberta.ca		Cheng, Irene/0000-0001-9699-4895; ISLAM, MD SAMIUL/0000-0003-2511-3557; Sun, Xinyao/0000-0003-3073-4462	NSERC [CRDPJ 543428-19]	NSERC(Natural Sciences and Engineering Research Council of Canada (NSERC))	This research was funded by NSERC grant number CRDPJ 543428-19.		59	0	0	6	7	MDPI	BASEL	ST ALBAN-ANLAGE 66, CH-4052 BASEL, SWITZERLAND		1424-8220		SENSORS-BASEL	Sensors	NOV	2022	22	21
J	Wang, ML; Meng, GW; Huang, Q				Wang, Meiling; Meng, Guowen; Huang, Qing			Spinach-extracted chlorophyll-a modified peanut shell as fluorescence sensors for selective detection of Hg2+ in water	SENSORS AND ACTUATORS B-CHEMICAL			English	Article						Peanut shell; Chlorophyll-a; Hg2+; Fluorescence detection	LIQUID-CHROMATOGRAPHY; MERCURY; REMOVAL; ADSORPTION; IONS	A prototype of environmentally friendly and low-cost fluorescence sensor, consisting of spinach extracted chlorophyll-a modified alkali-treated peanut shell (denoted as chlorophyll-a@ peanut shell), is achieved and used for trace detection of Hg2+ in aqueous solutions through fluorescence quenching method. The chlorophyll-a@ peanut shell exhibits a linear dynamic detection range from 0 to 19 x 10…	[Wang, Meiling; Meng, Guowen] Chinese Acad Sci, Inst Solid State Phys, Key Lab Mat Phys, Hefei 230031, Peoples R China; [Wang, Meiling; Meng, Guowen] Chinese Acad Sci, Inst Solid State Phys, Anhui Key Lab Nanomat & Nanotechnol, Hefei 230031, Peoples R China; [Huang, Qing] Chinese Acad Sci, Key Lab Ion Beam Bioengn, Hefei 230031, Peoples R China; [Meng, Guowen] Univ Sci & Technol China, Hefei 2300…	Chinese Academy of Sciences; Hefei Institutes of Physical Science, CAS; Chinese Academy of Sciences; Hefei Institutes of Physical Science, CAS; Chinese Academy of Sciences; Chinese Academy of Sciences; University of Science & Technology of China, CAS	Meng, GW (corresponding author), Chinese Acad Sci, Inst Solid State Phys, Key Lab Mat Phys, Hefei 230031, Peoples R China.	gwmeng@issp.ac.cn			National Key Basic Research Program of China [2013CB934304]; NSFC [21307138, 11274312, 11175204]; President Foundation of Hefei Institutes of Physical Science, Chinese Academy of Sciences [YZJJ201312]; CAS/SAFEA International Partnership Program for Creative Research Teams	National Key Basic Research Program of China(National Basic Research Program of China); NSFC(National Natural Science Foundation of China (NSFC)); President Foundation of Hefei Institutes of Physical Science, Chinese Academy of Sciences(Chinese Academy of Sciences); CAS/SAFEA International Partnership Program for Creative Research Teams(Chinese Academy of Sciences)	This work was financially supported by the National Key Basic Research Program of China (Grant 2013CB934304), the NSFC (21307138, 11274312 and 11175204), and the President Foundation of Hefei Institutes of Physical Science, Chinese Academy of Sciences (YZJJ201312). Research Supported by the CAS/SAFEA International Partnership Program for Creative Research Teams.		23	15	17	0	86	ELSEVIER SCIENCE SA	LAUSANNE	PO BOX 564, 1001 LAUSANNE, SWITZERLAND	0925-4005			SENSOR ACTUAT B-CHEM	Sens. Actuator B-Chem.	2023-03-31	2015	209
J	Zhou, GH; Jin, B; Wang, Y; Dong, QQ; Maity, A; Chang, JB; Ren, R; Pu, HH; Sui, XY; Mao, S; Chen, JH				Zhou, Guihua; Jin, Bing; Wang, Yale; Dong, Qianqian; Maity, Arnab; Chang, Jingbo; Ren, Ren; Pu, Haihui; Sui, Xiaoyu; Mao, Shun; Chen, Junhong			Ultrasensitive sensors based on aluminum oxide-protected reduced graphene oxide for phosphate ion detection in real water	MOLECULAR SYSTEMS DESIGN & ENGINEERING			English	Article							ADSORPTION; PHOSPHORUS	Real-time detection of phosphate ions is critical for monitoring the eutrophication status of surface water. We report an ultrasensitive phosphate sensor based on a reduced graphene oxide field-effect transistor (rGO-FET). In this work, rGO nanosheets were employed as sensing channels and an aluminum oxide (Al2O3) film was applied as a passivation layer to separate the sensing channels from the s…	[Zhou, Guihua; Jin, Bing; Wang, Yale; Dong, Qianqian; Maity, Arnab; Chang, Jingbo; Ren, Ren; Pu, Haihui; Sui, Xiaoyu; Chen, Junhong] Univ Wisconsin, Coll Engn & Appl Sci, Dept Mech Engn, 3200 N Cramer St, Milwaukee, WI 53211 USA; [Mao, Shun] Tongji Univ, Coll Environm Sci & Engn, State Key Lab Pollut Control & Resource Reuse, 1239 Siping Rd, Shanghai 200092, Peoples R China; [Mao, Shun] Shanghai …	University of Wisconsin System; University of Wisconsin Milwaukee; Tongji University; University of Chicago; United States Department of Energy (DOE); Argonne National Laboratory	Chen, JH (corresponding author), Univ Wisconsin, Coll Engn & Appl Sci, Dept Mech Engn, 3200 N Cramer St, Milwaukee, WI 53211 USA.;Chen, JH (corresponding author), Univ Chicago, Pritzker Sch Mol Engn, Chicago, IL 60637 USA.;Chen, JH (corresponding author), Argonne Natl Lab, 9700 S Cass Ave, Argonne, IL 60439 USA.	junhongchen@uchicago.edu	MAO, SHUN/G-9966-2015; Wang, Yale/AHE-0201-2022	MAO, SHUN/0000-0003-3319-4203; Wang, Yale/0000-0001-8759-3408	U.S. National Science Foundation through the NSF GOALI grant [CBET-1606057]	U.S. National Science Foundation through the NSF GOALI grant	This work is financially supported by the U.S. National Science Foundation through the NSF GOALI grant (CBET-1606057). The authors thank Dr. Heather Owen, Mr. Donald Robertson, Dr. Steven Hardcastle, and Mr. Patrick Anderson for technical support with SEM, TEM, AFM, and IC analyses, respectively. We also want to thank Dr. Guanglong Tian and Dr. Heng Zhang from the Metropolitan Water Reclamation D…		29	11	11	6	32	ROYAL SOC CHEMISTRY	CAMBRIDGE	THOMAS GRAHAM HOUSE, SCIENCE PARK, MILTON RD, CAMBRIDGE CB4 0WF, CAMBS, ENGLAND	2058-9689			MOL SYST DES ENG	Mol. Syst. Des. Eng.	2023-06-01	2020	5	5
J	Chouhan, RS; Zitko, G; Fajon, V; Zivkovic, I; Pavlin, M; Berisha, S; Jerman, I; Vesel, A; Horvat, M				Chouhan, Raghuraj S.; Zitko, Gregor; Fajon, Vesna; Zivkovic, Igor; Pavlin, Majda; Berisha, Sabina; Jerman, Ivan; Vesel, Alenka; Horvat, Milena			A Unique Interactive Nanostructure Knitting based Passive Sampler Adsorbent for Monitoring of Hg2+ in Water	SENSORS			English	Article						nanosheets; adsorption; passive sampler; mercury; analysis	GRAPHITIC CARBON NITRIDE; WASTE-WATER; ULTRASENSITIVE DETECTION; CONJUGATE MATERIAL; G-C3N4 NANOSHEETS; CESIUM REMOVAL; EFFICIENT; MERCURY; IONS; ADSORPTION	This work reports the development of ultralight interwoven ultrathin graphitic carbon nitride (g-CN) nanosheets for use as a potential adsorbent in a passive sampler (PAS) designed to bind Hg2+ ions. The g-CN nanosheets were prepared from bulk g-CN synthesised via a modified high-temperature short-time (HTST) polycondensation process. The crystal structure, surface functional groups, and morpholo…	[Chouhan, Raghuraj S.; Fajon, Vesna; Zivkovic, Igor; Pavlin, Majda; Horvat, Milena] Inst Jozef Stefan, Dept Environm Sci, Jamova 39, Ljubljana 1000, Slovenia; [Zitko, Gregor; Jerman, Ivan] Natl Inst Chem, Hajdrihova 19, Ljubljana 1000, Slovenia; [Berisha, Sabina] Jozef Stefan Int Postgrad Sch IPS, Jamova 39, Ljubljana 1000, Slovenia; [Vesel, Alenka] Inst Jozef Stefan, Dept Surface Engn, Jamova 39…	Slovenian Academy of Sciences & Arts (SASA); Jozef Stefan Institute; National Institute of Chemistry - Slovenia; Slovenian Academy of Sciences & Arts (SASA); Jozef Stefan Institute	Chouhan, RS (corresponding author), Inst Jozef Stefan, Dept Environm Sci, Jamova 39, Ljubljana 1000, Slovenia.	raghuraj.singh@ijs.si	Pavlin, Majda/ABF-1585-2021; Chouhan, Raghuraj Singh/AAB-7333-2019; Pavlin, Majda/AAA-1892-2022; Jerman, Ivan/AAE-2628-2019; Živković, Igor/L-3763-2016	Chouhan, Raghuraj Singh/0000-0003-1805-7358; Pavlin, Majda/0000-0002-1701-8130; Jerman, Ivan/0000-0003-4476-3571; Živković, Igor/0000-0003-1774-1203; Zitko, Gregor/0000-0003-0155-047X	EU [621329]; MercOx (Metrology for oxidised mercury) [16ENV01]; ERA-NET [GA 689443]; Slovenian Research Agency [ARRS N1-1100 (G030119N-FWO)]; ARRS programme [P1-0143]	EU(European Commission); MercOx (Metrology for oxidised mercury); ERA-NET; Slovenian Research Agency(Slovenian Research Agency - Slovenia); ARRS programme(Slovenian Research Agency - Slovenia)	We gratefully acknowledge the EU funded project ISO-FOOD ERA Chair for isotope techniques in food quality, safety, and traceability (Grant agreement ID: 621329) and MercOx (Metrology for oxidised mercury; 16ENV01) funded under EMPIR (The European Metrology Programme for Innovation and Research) that has been developed as an integrated part of Horizon 2020, the EU Framework Programme for Research …		68	3	3	0	15	MDPI	BASEL	ST ALBAN-ANLAGE 66, CH-4052 BASEL, SWITZERLAND		1424-8220		SENSORS-BASEL	Sensors	2023-08-01	2019	19	15
J	Horel, J; Crosman, E; Jacques, A; Blaylock, B; Arens, S; Long, A; Sohl, J; Martin, R				Horel, John; Crosman, Erik; Jacques, Alexander; Blaylock, Brian; Arens, Seth; Long, Ansley; Sohl, John; Martin, Randal			Summer ozone concentrations in the vicinity of the Great Salt Lake	ATMOSPHERIC SCIENCE LETTERS			English	Article						Great Salt Lake; ozone; air quality; lake breeze; wildfires; thermally driven circulations; mobile observations	BOUNDARY-LAYER; AIR-POLLUTION	Residents near the Great Salt Lake in northern Utah, USA have been exposed to ozone levels during recent summers exceeding the current United States National Ambient Air Quality Standard. Accurately forecasting those exceedances has been difficult as a result of the complex meteorological and photochemical processes fostering them. To help improve such forecasts, a low-cost field study was conduc…	[Horel, John; Crosman, Erik; Jacques, Alexander; Blaylock, Brian; Long, Ansley] Univ Utah, Dept Atmospher Sci, 135S 1460 E,Room 819, Salt Lake City, UT 84112 USA; [Arens, Seth] Utah Dept Environm Qual, Div Air Qual, Salt Lake City, UT USA; [Arens, Seth] Western Water Assessment, Salt Lake City, UT USA; [Sohl, John] Weber State Univ, Dept Phys, Ogden, UT 84408 USA; [Martin, Randal] Utah State Univ…	Utah System of Higher Education; University of Utah; Utah System of Higher Education; Weber State University; Utah System of Higher Education; Utah State University	Horel, J (corresponding author), Univ Utah, Dept Atmospher Sci, 135S 1460 E,Room 819, Salt Lake City, UT 84112 USA.	john.horel@utah.edu	Blaylock, Brian Kenneth/HPD-4455-2023	Blaylock, Brian Kenneth/0000-0003-2133-9313; Horel, John/0000-0002-2328-5008	Utah Division of Air Quality	Utah Division of Air Quality	We appreciate the assistance of everyone involved in the GSLSO<INF>3</INF>S, including those at the Utah Division of Air Quality (Munkh Baassandorj, Katherine Chapman, Mark Squire), the University of Utah (Luke Leclair-Marzolf, Will Howard, Jeff Jenkins, Allyson Dugan, Sebastian Hoch, Susan Bush, Xia Dong, Nola Lucke, Taylor McCorkle, Dillon Ulrich, Tom Gowan, Chris Galli, Fahad Alotaibi), and We…		22	20	21	6	35	WILEY	HOBOKEN	111 RIVER ST, HOBOKEN 07030-5774, NJ USA	1530-261X			ATMOS SCI LETT	Atmos. Sci. Lett.	SEP	2016	17	9
J	Klevinskas, A; Kantminiene, K; Zmuidzinaviciene, N; Jonuskiene, I; Griskonis, E				Klevinskas, Arnas; Kantminiene, Kristina; Zmuidzinaviciene, Nerita; Jonuskiene, Ilona; Griskonis, Egidijus			Microbial Fuel Cell as a Bioelectrochemical Sensor of Nitrite Ions	PROCESSES			English	Article						microbial fuel cell; biosensor; nitrite; Shewanella putrefaciens; graphite felt	ELECTROCHEMICAL SENSOR; WASTE-WATER; GRAPHENE; TECHNOLOGY; BIOSENSOR	The deteriorating environmental quality requires a rapid in situ real-time monitoring of toxic compounds in environment including water and wastewater. One of the most toxic nitrogen-containing ions is nitrite ion, therefore, it is particularly important to ensure that nitrite ions are completely absent in surface and ground waters as well as in wastewater or, at least, their concentration does n…	[Klevinskas, Arnas; Kantminiene, Kristina; Zmuidzinaviciene, Nerita; Griskonis, Egidijus] Kaunas Univ Technol, Dept Phys & Inorgan Chem, Fac Chem Technol, Radvilenu Pl 19, LT-50254 Kaunas, Lithuania; [Jonuskiene, Ilona] Kaunas Univ Technol, Dept Organ Chem, Fac Chem Technol, Radvilenu Pl 19, LT-50254 Kaunas, Lithuania	Kaunas University of Technology; Kaunas University of Technology	Kantminiene, K; Griskonis, E (corresponding author), Kaunas Univ Technol, Dept Phys & Inorgan Chem, Fac Chem Technol, Radvilenu Pl 19, LT-50254 Kaunas, Lithuania.	arnas.klevinskas@outlook.com; kristina.kantminiene@ktu.lt; nerita.zmuidzinaviciene@ktu.lt; ilona.jonuskiene@ktu.lt; egidijus.griskonis@ktu.lt	Griškonis, Egidijus/L-2235-2018; Kantminiene, Kristina/J-6602-2018	Griškonis, Egidijus/0000-0002-3426-6857; Kantminiene, Kristina/0000-0002-0266-8608; Jonuskiene, Ilona/0000-0002-6865-6888; Griskonis, Egidijus/0000-0003-1945-4806	European Social Fund [09.3.3.-LMT-K-712-22-0044]; Research Council of Lithuania (LMTLT)	European Social Fund(European Social Fund (ESF)); Research Council of Lithuania (LMTLT)(Research Council of Lithuania (LMTLT))	Part of the research leading to these results has received a funding from European Social Fund (project No 09.3.3.-LMT-K-712-22-0044) under grant agreement with the Research Council of Lithuania (LMTLT).		47	1	1	2	20	MDPI	BASEL	ST ALBAN-ANLAGE 66, CH-4052 BASEL, SWITZERLAND		2227-9717		PROCESSES	Processes	AUG	2021	9	8
J	Xiong, SF; Cui, YH; Wei, WC; Zhu, FM; Liang, GD				Xiong, Shengfa; Cui, Yuhan; Wei, Wanchu; Zhu, Fangming; Liang, Guodong			Fluorescent nanoparticles of amphiphilic block copolymers for sensitive and rapid detection of N-ethylaniline in water	DYES AND PIGMENTS			English	Article						Aggregation-induced emission; Fluorescence; Detection; Block copolymer; Pollutants	AGGREGATION-INDUCED EMISSION; VOLATILE ORGANIC-COMPOUNDS; LIGHT-UP DETECTION; CONJUGATED POLYMER; NAPHTHALENE DIIMIDE; SELECTIVE DETECTION; GAS-CHROMATOGRAPHY; AROMATIC-AMINES; QUANTUM YIELD; PROBE	The detection of organic pollutants in water is very important for counteracting environmental contaminant. Conventional detection methods show some disadvantages including complicated and time-consuming processes as well as expensive equipments. Here, a fluorescent amphiphilic diblock copolymer with aggregation-induced emission (AIE) feature and long fluorescence lifetime is used for rapid detec…	[Xiong, Shengfa; Cui, Yuhan; Liang, Guodong] Sun Yat Sen Univ, PCFM Lab, Sch Mat Sci & Engn, Guangzhou 510275, Guangdong, Peoples R China; [Xiong, Shengfa; Cui, Yuhan; Liang, Guodong] Sun Yat Sen Univ, GDHPPC Lab, Sch Mat Sci & Engn, Guangzhou 510275, Guangdong, Peoples R China; [Wei, Wanchu; Zhu, Fangming] Sun Yat Sen Univ, Sch Chem, Guangzhou 510275, Guangdong, Peoples R China	Sun Yat Sen University; Sun Yat Sen University; Sun Yat Sen University	Liang, GD (corresponding author), Sun Yat Sen Univ, PCFM Lab, Sch Mat Sci & Engn, Guangzhou 510275, Guangdong, Peoples R China.;Liang, GD (corresponding author), Sun Yat Sen Univ, GDHPPC Lab, Sch Mat Sci & Engn, Guangzhou 510275, Guangdong, Peoples R China.	lgdong@mail.sysu.edu.cn	Zhu, Fang/IRY-9603-2023; Liang, Guodong/A-1103-2013	Liang, Guodong/0000-0001-9103-4545	NSFC [21374136]; Fundamental Research Funds for the Central Universities [17lgjc03and 18lgpy04]	NSFC(National Natural Science Foundation of China (NSFC)); Fundamental Research Funds for the Central Universities(Fundamental Research Funds for the Central Universities)	The financial support is partially from NSFC (21374136) , the Fundamental Research Funds for the Central Universities (17lgjc03and 18lgpy04) .		82	2	2	5	55	ELSEVIER SCI LTD	OXFORD	THE BOULEVARD, LANGFORD LANE, KIDLINGTON, OXFORD OX5 1GB, OXON, ENGLAND	0143-7208	1873-3743		DYES PIGMENTS	Dyes Pigment.	JUN	2021	190
J	Kerkez, B; Gruden, C; Lewis, M; Montestruque, L; Quigley, M; Wong, B; Bedig, A; Kertesz, R; Braun, T; Cadwalader, O; Poresky, A; Pak, C				Kerkez, Branko; Gruden, Cyndee; Lewis, Matthew; Montestruque, Luis; Quigley, Marcus; Wong, Brandon; Bedig, Alex; Kertesz, Ruben; Braun, Tim; Cadwalader, Owen; Poresky, Aaron; Pak, Carrie			Smarter Stormwater Systems	ENVIRONMENTAL SCIENCE & TECHNOLOGY			English	Article							REAL-TIME CONTROL; CLIMATE-CHANGE; WATER; URBANIZATION; IMPACTS; INFRASTRUCTURE; PERFORMANCE; REMOVAL	Existing stormwater systems require significant investments to meet challenges imposed by climate change; rapid urbanization, and evolving regulations. There is an unprecedented opportunity to improve urban water quality by equipping stormwater systems with low-cost sensors and controllers. This will transform their operation from static to adaptive, permitting them to be instantly redesigned to …	[Kerkez, Branko; Wong, Brandon] Univ Michigan, Dept Civil & Environm Engn, Ann Arbor, MI 48109 USA; [Gruden, Cyndee] Univ Toledo, Dept Civil Engn, Toledo, OH 43606 USA; [Lewis, Matthew] Michigan Aerosp Corp, Ann Arbor, MI 48108 USA; [Montestruque, Luis; Kertesz, Ruben; Braun, Tim] Emnet LLC, South Bend, IN 46617 USA; [Quigley, Marcus; Bedig, Alex; Cadwalader, Owen] OptiRTC Inc, Boston, MA 02116 U…	University of Michigan System; University of Michigan; University System of Ohio; University of Toledo	Kerkez, B (corresponding author), Univ Michigan, Dept Civil & Environm Engn, Ann Arbor, MI 48109 USA.	bkerkez@umich.edu	Liu, Yifan/S-6217-2017	Wong, Brandon/0000-0002-0109-6150	Great Lakes Protection Fund	Great Lakes Protection Fund	Branko Kerkez, Cyndee Gruden, Matthew Lewis and Brandon Wong are supported by the Great Lakes Protection Fund. We acknowledge the CWS staff, including Richard Boyle, Jadene Stensland and Andy Braun, Doug Schuh, and Jeff Van Note, as well as the city of South Bend, including Gary Gilot, Eric Horvath, Patrick Henthorn, Al Greek and Jack Dillon. All data used to generate the figures in this paper ar…		45	134	137	6	95	AMER CHEMICAL SOC	WASHINGTON	1155 16TH ST, NW, WASHINGTON, DC 20036 USA	0013-936X	1520-5851		ENVIRON SCI TECHNOL	Environ. Sci. Technol.	2023-07-19	2016	50	14
J	Rele, B; Hogan, C; Kandanaarachchi, S; Leigh, C				Rele, Bhargav; Hogan, Caleb; Kandanaarachchi, Sevvandi; Leigh, Catherine			Short-term prediction of stream turbidity using surrogate data and a meta-model approach: A case study	HYDROLOGICAL PROCESSES			English	Article						ARIMA; GAM; LSTM; meta-model; river; time series forecasting; turbidity; water quality	RIVER	Many water-quality monitoring programs aim to measure turbidity to help guide effective management of waterways and catchments, yet distributing turbidity sensors throughout networks is typically cost prohibitive. To this end, we built and compared the ability of dynamic regression (auto-regressive integrated moving average [ARIMA]), long short-term memory neural nets (LSTM), and generalized addi…	[Rele, Bhargav; Leigh, Catherine] RMIT Univ, Sch Sci, Biosci & Food Technol Discipline, Bundoora, Vic 3083, Australia; [Hogan, Caleb; Kandanaarachchi, Sevvandi] RMIT Univ, Sch Sci & Math Sci, Melbourne, Vic 3000, Australia; [Kandanaarachchi, Sevvandi] CSIROs Data61, Res Way, Clayton, Vic 3168, Australia	Royal Melbourne Institute of Technology (RMIT); Royal Melbourne Institute of Technology (RMIT); Commonwealth Scientific & Industrial Research Organisation (CSIRO)	Kandanaarachchi, S (corresponding author), CSIROs Data61, Res Way, Clayton, Vic 3168, Australia.	sevvandi.kandanaarachchi@data61.csiro.au			Australian Research Council Centre of Excellence for Mathematical and Statistical Frontiers [CE140100049]; RMIT University	Australian Research Council Centre of Excellence for Mathematical and Statistical Frontiers(Australian Research Council); RMIT University	Australian Research Council Centre of Excellence for Mathematical and Statistical Frontiers, Grant/Award Number: CE140100049; RMIT University		37	0	0	7	7	WILEY	HOBOKEN	111 RIVER ST, HOBOKEN 07030-5774, NJ USA	0885-6087	1099-1085		HYDROL PROCESS	Hydrol. Process.	APR	2023	37	4
J	Ali, MA; Dong, L; Dhau, J; Khosla, A; Kaushik, A				Ali, Md Azahar; Dong, Liang; Dhau, Jaspreet; Khosla, Ajit; Kaushik, Ajeet			Perspective-Electrochemical Sensors for Soil Quality Assessment	JOURNAL OF THE ELECTROCHEMICAL SOCIETY			English	Article							ION-SELECTIVE ELECTRODES; NITRATE; WATER; BIOSENSORS; POTASSIUM; CARBON; OXIDE	Soil monitoring is emerging as a key factor to manage smart farming which has been recommended to have economical food safety and security. Among various development for example internet of things assisted farming, electrochemical sensing system are getting popularity via detecting one or multiple soil component effectively, efficiently, and selectively for soil quality assessment remotely via da…	[Ali, Md Azahar] Univ Notre Dame, Aerosp & Mech Engn, Notre Dame, IN 46556 USA; [Ali, Md Azahar; Dong, Liang] Iowa State Univ, Dept Elect & Comp Engn, Ames, IA 50011 USA; [Dhau, Jaspreet] Molecule Inc, Tampa, FL USA; [Khosla, Ajit] Yamagata Univ, Dept Mech Syst Engn, Yonezawa, Yamagata, Japan; [Kaushik, Ajeet] Florida Polytech Univ, Div Sci Art & Math, Dept Nat Sci, Lakeland, FL 33805 USA	University of Notre Dame; Iowa State University; Yamagata University; Florida Polytechnical University	Ali, MA (corresponding author), Univ Notre Dame, Aerosp & Mech Engn, Notre Dame, IN 46556 USA.;Ali, MA (corresponding author), Iowa State Univ, Dept Elect & Comp Engn, Ames, IA 50011 USA.;Kaushik, A (corresponding author), Florida Polytech Univ, Div Sci Art & Math, Dept Nat Sci, Lakeland, FL 33805 USA.	aali3@nd.edu; ajeet.npl@gmail.com	Khosla, Ajit/AAE-9817-2019; Kaushik, Ajeet Kuamr/K-1289-2018; Khosla, Ajit/D-7177-2019; Dong, Liang/IAR-4638-2023; Ali, Md Azahar/B-5573-2017	Khosla, Ajit/0000-0002-2803-8532; Kaushik, Ajeet Kuamr/0000-0003-4206-1541; Khosla, Ajit/0000-0002-2803-8532; Khosla, Ajit/0000-0002-9868-0926; Ali, Md Azahar/0000-0001-5752-8808					53	47	47	1	6	ELECTROCHEMICAL SOC INC	PENNINGTON	65 SOUTH MAIN STREET, PENNINGTON, NJ 08534 USA	0013-4651	1945-7111		J ELECTROCHEM SOC	J. Electrochem. Soc.	2023-01-27	2020	167	3
J	Nehru, R; Kumar, BS; Chen, CW; Cheng-Di Dong				Nehru, Raja; Kumar, Balamurugan Senthil; Chen, Chiu-Wen; Cheng-Di Dong			Yolk-shell structured molybdenum disulfide nanospheres as highly enhanced electrocatalyst for electrochemical sensing of hazardous 4-nitro-phenol in water	JOURNAL OF ENVIRONMENTAL CHEMICAL ENGINEERING			English	Article						Molybdenum disulfide; Structural materials; Environmental monitoring; Toxic chemical; Electrocatalytic sensor	NITROPHENOL ISOMERS; SELECTIVE DETECTION; FACILE SYNTHESIS; URIC-ACID; MOS2; CARBON; NANOPARTICLES; PERFORMANCE; 4-NITROPHENOL; EXTRACTION	Nanoscale materials are of great interest with functional improvement to develop prominent sensors with high sensitivity and analytical beneficial output signals, which could help emerging environmental pollutants detection in daily life. Transition metal dichalcogenide (TMD)-based electrode materials are of significant interest for environmentally hazardous 4-nitrophenol (4-NP) detection that ho…	[Nehru, Raja; Kumar, Balamurugan Senthil; Chen, Chiu-Wen; Cheng-Di Dong] Natl Kaohsiung Univ Sci & Technol, Sustainable Environm Res Ctr, Kaohsiung 81157, Taiwan; [Nehru, Raja; Kumar, Balamurugan Senthil; Chen, Chiu-Wen; Cheng-Di Dong] Natl Kaohsiung Univ Sci & Technol, Dept Marine Environm Engn, Kaohsiung 81157, Taiwan	National Kaohsiung University of Science & Technology; National Kaohsiung University of Science & Technology	Cheng-Di Dong (corresponding author), Natl Kaohsiung Univ Sci & Technol, Sustainable Environm Res Ctr, Kaohsiung 81157, Taiwan.	cddong@nkust.edu.tw	Nehru, Raja/AAF-6222-2019; Nehru, Raja/ADB-3693-2022	Nehru, Raja/0000-0002-9305-8513; Nehru, Raja/0000-0002-9305-8513	National Kaohsiung University of Science and Technology, Kaohsiung, Taiwan [109-2222-E-992-002]; Taiwan MOST	National Kaohsiung University of Science and Technology, Kaohsiung, Taiwan; Taiwan MOST	Acknowledgments The authors thankfully appreciate the financial support from the National Kaohsiung University of Science and Technology, Kaohsiung, Taiwan. The authors would like to acknowledge the Taiwan MOST for funding support (Ref. No. 109-2222-E-992-002) .		56	4	4	4	19	ELSEVIER SCI LTD	OXFORD	THE BOULEVARD, LANGFORD LANE, KIDLINGTON, OXFORD OX5 1GB, OXON, ENGLAND	2213-2929	2213-3437		J ENVIRON CHEM ENG	J. Environ. Chem. Eng.	JUN	2022	10	3
J	Yeung, H; Ehlers, JD; Waniska, RD; Alviola, JN; Rooney, LW				Yeung, H.; Ehlers, J. D.; Waniska, R. D.; Alviola, J. N.; Rooney, L. W.			Rapid screening methods to evaluate cowpea cooking characteristics	FIELD CROPS RESEARCH			English	Review						Cowpea; Cowpea breeding; Cowpea grain quality; Grain legume cooking quality	UNGUICULATA-L WALP; VIGNA-UNGUICULATA; SENSORY CHARACTERISTICS; HUMAN FOOD; SOAKING; TIME; VARIETIES; MICROSTRUCTURE; QUALITY	Current methods of evaluating cooking quality of grain legumes are inefficient and costly. As a result. breeders tend to delay cooking quality evaluations until late in the breeding process after the number of breeding lines has been markedly reduced. Cooking quality evaluations conducted earlier in the process, when genetic variation for these traits is high and can be exploited by selection, wo…	[Ehlers, J. D.] Univ Calif Riverside, Dept Bot & Plant Sci, Riverside, CA 92521 USA; [Yeung, H.] Kellogg Co, Battle Creek, MI 49017 USA; [Waniska, R. D.; Alviola, J. N.; Rooney, L. W.] Texas A&M Univ, Cereal Qual Lab, Dept Soil & Crop Sci, College Stn, TX 77843 USA	University of California System; University of California Riverside; Texas A&M University System; Texas A&M University College Station	Ehlers, JD (corresponding author), Univ Calif Riverside, Dept Bot & Plant Sci, Riverside, CA 92521 USA.	jeff.ehlers@ucr.edu		Alviola, Juma Novie/0000-0002-4890-9008					26	11	12	0	22	ELSEVIER SCIENCE BV	AMSTERDAM	PO BOX 211, 1000 AE AMSTERDAM, NETHERLANDS	0378-4290	1872-6852		FIELD CROP RES	Field Crop. Res.	2023-06-26	2009	112	2023-02-03
J	Li, J; Zhao, YX; Wu, Q; Yang, H; Lu, J; Ma, HY; Wang, SN; Li, YW				Li, Jing; Zhao, Yun-Xiu; Wu, Qian; Yang, Hua; Lu, Jing; Ma, Hui-Yan; Wang, Su-Na; Li, Yun-Wu			A Cd-MOF fluorescence sensor with dual functional sites for efficient detection of metal ions in multifarious water environments	CRYSTENGCOMM			English	Article							BASIC PYRIDYL SITES; STRUCTURED EU-MOF; ORGANIC FRAMEWORK; SELECTIVE DETECTION; SENSITIVE DETECTION; LUMINESCENT; FE3+; PROBE; FE(III); CU2+	High-performance fluorescence sensors combining convenience, low cost and high sensitivity are prospective for water pollution and human health. Luminescent metal-organic frameworks (LMOFs) as sensors can meet these criteria for high efficient detection of toxic metal ions. Herein, a new LMOF LCU-109 has been fabricated by Sharpless in situ tetrazole synthesis system assisted by polycarboxylic O-…	[Ma, Hui-Yan; Wang, Su-Na; Li, Yun-Wu] Liaocheng Univ, Shandong Prov Key Lab Chem Energy Storage & Novel, Liaocheng 252000, Shandong, Peoples R China; Liaocheng Univ, Sch Chem & Chem Engn, Liaocheng 252000, Shandong, Peoples R China	Liaocheng University; Liaocheng University	Ma, HY; Wang, SN; Li, YW (corresponding author), Liaocheng Univ, Shandong Prov Key Lab Chem Energy Storage & Novel, Liaocheng 252000, Shandong, Peoples R China.	mahuiyanyan@163.com; wangsuna@lcu.edu.cn; liyunwu@lcu.edu.cn	Li, Yun-Wu/K-7029-2014	Li, Yun-Wu/0000-0001-7673-7787	National Natural Science Foundation of China [21771095, 21571092]; Natural Science Foundation of Shandong Province [ZR2017JL013]; Youth Innovation Team of Shandong Colleges and Universities [2019KJC027]	National Natural Science Foundation of China(National Natural Science Foundation of China (NSFC)); Natural Science Foundation of Shandong Province(Natural Science Foundation of Shandong Province); Youth Innovation Team of Shandong Colleges and Universities	This work was financially supported by the National Natural Science Foundation of China (21771095 and 21571092), the Natural Science Foundation of Shandong Province (ZR2017JL013), and the Youth Innovation Team of Shandong Colleges and Universities (2019KJC027).		74	11	11	7	44	ROYAL SOC CHEMISTRY	CAMBRIDGE	THOMAS GRAHAM HOUSE, SCIENCE PARK, MILTON RD, CAMBRIDGE CB4 0WF, CAMBS, ENGLAND		1466-8033		CRYSTENGCOMM	Crystengcomm	2023-12-06	2021	23	47
J	CORWIN, DL; LEMERT, RD				CORWIN, DL; LEMERT, RD			CONSTRUCTION AND EVALUATION OF AN INEXPENSIVE WEIGHING LYSIMETER FOR STUDYING CONTAMINANT TRANSPORT	JOURNAL OF CONTAMINANT HYDROLOGY			English	Article							SOIL COLUMNS; FUNCTIONAL-MODEL; SOLUTE TRANSPORT; MOVEMENT; FLOW	A description is provided of an above-ground, weighing lysimeter that minimizes the edge flow of water which can occur between the soil and the wall of the casing. The lysimeter was designed to study water flux and the movement of inorganic and/or organic pollutants as they pass through and beyond the root zone. The lysimeter is instrumented at selected depths with thermistors, soil solution extr…			CORWIN, DL (corresponding author), US ARS,US SALIN LAB,4500 GLENWOOD DR,RIVERSIDE,CA 92501, USA.								18	14	15	0	7	ELSEVIER SCIENCE BV	AMSTERDAM	PO BOX 211, 1000 AE AMSTERDAM, NETHERLANDS	0169-7722			J CONTAM HYDROL	J. Contam. Hydrol.	JAN	1994	15	2023-01-02
J	Agostino, V; Massaglia, G; Gerosa, M; Sacco, A; Saracco, G; Margaria, V; Quaglio, M				Agostino, V.; Massaglia, G.; Gerosa, M.; Sacco, A.; Saracco, G.; Margaria, V.; Quaglio, M.			Environmental electroactive consortia as reusable biosensing element for freshwater toxicity monitoring	NEW BIOTECHNOLOGY			English	Article; Proceedings Paper	10th International Conference on Environmental Engineering and Management (ICEEM)	SEP 18-21, 2019	Iasi, ROMANIA			Electroactive river sediment consortium; Reusable biosensor; Microbial Fuel Cell (MFC); Water toxicity; Glutaraldehyde; Heavy metals	MICROBIAL FUEL-CELL; SENSOR; TEMPERATURE; PERFORMANCE; GLUTARALDEHYDE; SENSITIVITY	The development of tools to monitor water quality is mandatory in a scenario where clean water resources are decreasing. Here, the biosensing capability of an electroactive river sediment consortium was tested towards three model contaminants (glutaraldehyde, nickel(II) and chromium(III)). The proposed biosensor is a small membraneless single chamber Microbial Fuel Cell (MFC), fabricated by 3D pr…	[Agostino, V.; Massaglia, G.; Gerosa, M.; Sacco, A.; Saracco, G.; Margaria, V.; Quaglio, M.] Ist Italiano Tecnol, Ctr Sustainable Future Technol Polito, Via Livorno 60, I-10144 Turin, Italy; [Agostino, V.; Massaglia, G.; Gerosa, M.] Politecn Torino, Dept Appl Sci & Technol, Corso Duca Abruzzi 24, I-10129 Turin, Italy	Istituto Italiano di Tecnologia - IIT; Polytechnic University of Turin	Margaria, V (corresponding author), Ist Italiano Tecnol, Ctr Sustainable Future Technol Polito, Via Livorno 60, I-10144 Turin, Italy.	valentina.margaria@iit.it	Sacco, Adriano/A-3953-2012; Quaglio, Marzia/U-9197-2017	Sacco, Adriano/0000-0002-9229-2113; Quaglio, Marzia/0000-0003-3707-8760; margaria, valentina/0000-0001-6125-4926	Fondazione Istituto Italiano di Tecnologia	Fondazione Istituto Italiano di Tecnologia	The authors thank Simona Pentassuglia and Daniyal Ahmed for their valuable support and the constructive discussions. The research was financially supported by Fondazione Istituto Italiano di Tecnologia.		46	15	14	6	87	ELSEVIER	AMSTERDAM	RADARWEG 29, 1043 NX AMSTERDAM, NETHERLANDS	1871-6784	1876-4347		NEW BIOTECHNOL	New Biotech.	2023-03-25	2020	55
J	Valadao, LV; Cicerelli, RE; de Almeida, T; Ma, JBC; Garnier, J				Valadao, Larissa Vieira; Cicerelli, Rejane Ennes; de Almeida, Tati; Ma, Julia Barbosa Curto; Garnier, Jeremie			Reservoir metrics estimated by remote sensors based on the Google Earth Engine platform	REMOTE SENSING APPLICATIONS-SOCIETY AND ENVIRONMENT			English	Article						Corumba IV; Temporal analysis; Water level; Surface area; Useful storage	SRTM DEM; LAKE	Artificial reservoirs produce most of the electric power generated in Brazil, and they are essential for water supply. Hence, sustainable management of water reservoirs, along with constant monitoring of water quality and quantity through effective and low-cost technologies, such as remote sensing, is vital to avoid hydrological stress and prevent water crises. However, monitoring longterm time s…	[Valadao, Larissa Vieira; Cicerelli, Rejane Ennes; de Almeida, Tati; Ma, Julia Barbosa Curto; Garnier, Jeremie] Univ Brasilia, Inst Geociencias, Campus Darcy Ribeiro L2, Brasilia, DF, Brazil; [Garnier, Jeremie] Univ Brasilia, Inst Rech Dev, Lab Mixte Int Observ Changements Environm LMI OCE, Brasilia, DF, Brazil	Universidade de Brasilia; Institut de Recherche pour le Developpement (IRD); Universidade de Brasilia	Valadao, LV (corresponding author), Univ Brasilia, Inst Geociencias, Campus Darcy Ribeiro L2, Brasilia, DF, Brazil.	valadao.larissa@gmail.com		Vieira Valadao, Larissa/0000-0002-8961-9517; DE ALMEIDA, TATI/0000-0002-6387-8254; Ennes Cicerelli, Rejane/0000-0002-8199-5163	Fundacao de Amparo a Pesquisa do Distrito Federal (FAPDF) [88887.597344/2021-00]; Coordenacao de Aperfeicoamento de Pessoal de Nivel Superior - Brasil (CAPES) [001]; Conselho Nacional de Desenvolvimento Cientifico e Tecnologico (CNPq) [302722/2018-1]	Fundacao de Amparo a Pesquisa do Distrito Federal (FAPDF)(Fundacao de Apoio a Pesquisa do Distrito Federal (FAPDF)); Coordenacao de Aperfeicoamento de Pessoal de Nivel Superior - Brasil (CAPES)(Coordenacao de Aperfeicoamento de Pessoal de Nivel Superior (CAPES)); Conselho Nacional de Desenvolvimento Cientifico e Tecnologico (CNPq)(Conselho Nacional de Desenvolvimento Cientifico e Tecnologico (CNP…	This research was funded by the Fundacao de Amparo a Pesquisa do Distrito Federal (FAPDF) grant number 88887.597344/2021-00, and by the Coordenacao de Aperfeicoamento de Pessoal de Nivel Superior - Brasil (CAPES) - Finance Code 001. Jeremie Garnier was supported by Conselho Nacional de Desenvolvimento Cientifico e Tecnologico (CNPq) grant 302722/2018-1.		34	1	1	1	6	ELSEVIER	AMSTERDAM	RADARWEG 29, 1043 NX AMSTERDAM, NETHERLANDS	2352-9385			REMOTE SENS APPL	Remote Sens. Appl.-Soc. Environ.	NOV	2021	24
J	Zamora-Garcia, I; Correa-Tome, FE; Hernandez-Belmonte, UH; Ayala-Ramirez, V; Ramirez-Paredes, JP				Zamora-Garcia, Ileana; Correa-Tome, Fernando E.; Hernandez-Belmonte, Uriel H.; Ayala-Ramirez, Victor; Ramirez-Paredes, Juan-Pablo			Mobile digital colorimetry for the determination of ammonia in aquaculture applications	COMPUTERS AND ELECTRONICS IN AGRICULTURE			English	Article						Ammonia determination; Digital image colorimetry; Vision-based sensor; Aquacultural water quality; Mobile sensors		Because of the increasing need for healthy and safe foods, the interest for aquaculture is growing. This is a low carbon trace approach to produce animal protein, but the efficiency of a farm depends on controlling a set of parameters related to the quality of the water. One of the most important parameters to keep under control in water is the concentration of ammonia, which increases by the acc…	[Zamora-Garcia, Ileana; Correa-Tome, Fernando E.; Hernandez-Belmonte, Uriel H.; Ayala-Ramirez, Victor; Ramirez-Paredes, Juan-Pablo] Univ Guanajuato, Div Engn, Irapuato Salamanca Campus,Carretera Salamanca, Salamanca 36885, Gto, Mexico; [Zamora-Garcia, Ileana; Correa-Tome, Fernando E.; Ramirez-Paredes, Juan-Pablo] Dept Elect Engn, Salamanca, Spain; [Hernandez-Belmonte, Uriel H.] Dept Art & Enterpr…	Universidad de Guanajuato	Ramirez-Paredes, JP (corresponding author), Univ Guanajuato, Div Engn, Irapuato Salamanca Campus,Carretera Salamanca, Salamanca 36885, Gto, Mexico.;Ramirez-Paredes, JP (corresponding author), Dept Elect Engn, Salamanca, Spain.	idr.zamora@ugto.mx; fcorrea@ugto.mx; uh.hernandez@ugto.mx; jpi.ramirez@ugto.mx	Ramirez-Paredes, Juan-Pablo/J-3190-2019; Correa-Tome, Fernando E/AAC-2813-2022	Ramirez-Paredes, Juan-Pablo/0000-0002-8746-1760; Zamora Garcia, Ileana del Rocio/0000-0002-4791-1632	University of Guanajuato, Mexico	University of Guanajuato, Mexico	Funding for this work was provided by the University of Guanajuato, Mexico.		24	5	5	0	16	ELSEVIER SCI LTD	OXFORD	THE BOULEVARD, LANGFORD LANE, KIDLINGTON, OXFORD OX5 1GB, OXON, ENGLAND	0168-1699	1872-7107		COMPUT ELECTRON AGR	Comput. Electron. Agric.	FEB	2021	181
J	Forcen-Munoz, M; Pavon-Pulido, N; Lopez-Riquelme, JA; Temnani-Rajjaf, A; Berrios, P; Morais, R; Perez-Pastor, A				Forcen-Munoz, Manuel; Pavon-Pulido, Nieves; Lopez-Riquelme, Juan Antonio; Temnani-Rajjaf, Abdelmalek; Berrios, Pablo; Morais, Raul; Perez-Pastor, Alejandro			Irriman Platform: Enhancing Farming Sustainability through Cloud Computing Techniques for Irrigation Management	SENSORS			English	Article						intelligent irrigation; GIS; cloud systems; precision agriculture; crop sustainability	DEFICIT IRRIGATION; PRECISION AGRICULTURE; WATER STATUS; ARCHITECTURE; PLANT	Crop sustainability is essential for balancing economic development and environmental care, mainly in strong and very competitive regions in the agri-food sector, such as the Region of Murcia in Spain, considered to be the orchard of Europe, despite being a semi-arid area with an important scarcity of fresh water. In this region, farmers apply efficient techniques to minimize supplies and maximiz…	[Forcen-Munoz, Manuel; Temnani-Rajjaf, Abdelmalek; Berrios, Pablo; Perez-Pastor, Alejandro] Tech Univ Cartagena, Agron Engn Tech Sch, Agron Engn Dept, Alfonso XIII Campus, Cartagena 30203, Spain; [Pavon-Pulido, Nieves; Lopez-Riquelme, Juan Antonio] Tech Univ Cartagena, Automat Elect Engn & Elect Technol Dept, Ind Engn Tech Sch, Muralla Mar Campus, Cartagena 30202, Spain; [Morais, Raul] Univ Tras …	Universidad Politecnica de Cartagena; Universidad Politecnica de Cartagena; INESC TEC; University of Tras-os-Montes & Alto Douro	Pavon-Pulido, N (corresponding author), Tech Univ Cartagena, Automat Elect Engn & Elect Technol Dept, Ind Engn Tech Sch, Muralla Mar Campus, Cartagena 30202, Spain.	manuel.forcen@edu.upct.es; nieves.pavon@upct.es; jantonio.lopez@upct.es; abdelmalek.temnani@edu.upct.es; pablo.berrios@edu.upct.es; rmorais@utad.pt; alex.perez-pastor@upct.es	Morais, Raul/C-1573-2015; Temnani, Abdelmalek/AGE-5673-2022; Reyes, Pablo Berríos/G-8164-2019; López Riquelme, Juan Antonio/AFP-3845-2022; Pavon Pulido, Nieves/L-2923-2015; Perez Pastor, Alejandro/F-6542-2016	Morais, Raul/0000-0003-2440-9153; Temnani, Abdelmalek/0000-0002-0451-301X; Reyes, Pablo Berríos/0000-0003-0122-6717; López Riquelme, Juan Antonio/0000-0002-1920-2716; Pavon Pulido, Nieves/0000-0001-9561-1151; Perez Pastor, Alejandro/0000-0001-8769-855X; Forcen Munoz, Manuel/0000-0002-4625-1214	Ministry of Economy, Industry and Competitiveness of Spain; National Research Agency (AEI) [PCIN-2017-091]; AEI [PID2019-106226RB-C22]	Ministry of Economy, Industry and Competitiveness of Spain(Spanish Government); National Research Agency (AEI); AEI	This research was funded by the International Joint Programming Actions 2017 included in the National R&D&I program on challenges to society by the Ministry of Economy, Industry and Competitiveness of Spain, National Research Agency (AEI) (PCIN-2017-091) and by the AEI (PID2019-106226RB-C22).		32	3	3	1	15	MDPI	BASEL	ST ALBAN-ANLAGE 66, CH-4052 BASEL, SWITZERLAND		1424-8220		SENSORS-BASEL	Sensors	JAN	2022	22	1
J	Bayana, D; Amde, M; Bekana, D; Liu, JF				Bayana, Dibaba; Amde, Meseret; Bekana, Deribachew; Liu, Jingfu			Bioinspired silver nanoparticles using Parthenium hysterophorus leaf extract for colorimetric detection of lead(II) ions	INTERNATIONAL JOURNAL OF ENVIRONMENTAL ANALYTICAL CHEMISTRY			English	Article; Early Access						Parthenium hysterophorus; biosynthesis; silver nanoparticles; colorimetric sensor; lead(II); water samples	GREEN SYNTHESIS; GOLD; PB2+; HG2+; MN2+	Lead (Pb) is one of the major heavy metal pollutants that can cause serious health problems to humans and the environment. This indicates that its concentration should be known to learn its levels in various environmental systems, and a powerful and economical analytical technique should be there to do so. In this study we report a simple, rapid, cost-effective and environmentally friendly colori…	[Bayana, Dibaba; Amde, Meseret; Bekana, Deribachew] Haramaya Univ, Coll Nat & Computat Sci, Dept Chem, Oromia, Ethiopia; [Amde, Meseret; Liu, Jingfu] Chinese Acad Sci, Res Ctr Ecoenvironm Sci, State Key Lab Environm Chem & Ecotoxicol, Beijing, Peoples R China	Haramaya University; Chinese Academy of Sciences; Research Center for Eco-Environmental Sciences (RCEES)	Amde, M (corresponding author), Haramaya Univ, Coll Nat & Computat Sci, Dept Chem, Oromia, Ethiopia.;Amde, M; Liu, JF (corresponding author), Chinese Acad Sci, Res Ctr Ecoenvironm Sci, State Key Lab Environm Chem & Ecotoxicol, Beijing, Peoples R China.	meseret.amde@haramaya.edu.et; jfliu@rcees.ac.cn	Bekana, Deribachew/D-2419-2018; Aga, Meseret Amde/I-1840-2016; , Jingfu/M-9391-2013	Bekana, Deribachew/0000-0002-1860-7244; Aga, Meseret Amde/0000-0003-3512-3361; , Jingfu/0000-0001-7134-7026; Hirpa, Dibaba Bayana/0009-0004-5685-0386	CAS President's International Fellowship Initiative (PIFI); Ethiopian Ministry of Education via Haramaya University [2020PE0047]	CAS President's International Fellowship Initiative (PIFI); Ethiopian Ministry of Education via Haramaya University	This work was funded by the CAS President's International Fellowship Initiative (PIFI) (Grant no. 2020PE0047) and the Ethiopian Ministry of Education via Haramaya University.		34	0	0	7	7	TAYLOR & FRANCIS LTD	ABINGDON	2-4 PARK SQUARE, MILTON PARK, ABINGDON OR14 4RN, OXON, ENGLAND	0306-7319	1029-0397		INT J ENVIRON AN CH	Int. J. Environ. Anal. Chem.	2022-12-12	2022
J	Cardoso, RM; Pereira, TS; dos Santos, DM; Migliorini, FL; Mattoso, LHC; Correa, DS				Cardoso, Rafael M.; Pereira, Tamires S.; dos Santos, Danilo M.; Migliorini, Fernanda L.; Mattoso, Luiz H. C.; Correa, Daniel S.			Laser-induced graphitized electrodes enabled by a 3D printer/diode laser setup for voltammetric detection of hormones	ELECTROCHIMICA ACTA			English	Article						Electrochemical sensors; Laser manufacturing; Emerging pollutants; portable device; laser modification	INDUCED GRAPHENE; SENSITIVE DETECTION; BETA-ESTRADIOL; 17-BETA-ESTRADIOL; NANOPARTICLES	Contraceptive pills have helped to shape modern society and their use has become more popular over the years. 13-estradiol, one of the molecules present in this type of medication, is considered an endocrine disrupting compound (EDC), being nowadays commonly found in water resources. Due to their adverse effects on human health and the environment, even at trace levels, low-cost and rapid-detecti…	[Cardoso, Rafael M.; Pereira, Tamires S.; dos Santos, Danilo M.; Migliorini, Fernanda L.; Mattoso, Luiz H. C.; Correa, Daniel S.] Embrapa Instrumentacao, Nanotechnol Natl Lab Agr LNNA, BR-13560970 Sao Carlos, SP, Brazil; [Pereira, Tamires S.; Correa, Daniel S.] Fed Univ Sao Carlos UFSCar, Ctr Exact Sci & Technol, Dept Chem, PPGQ, BR-13565905 Sao Carlos, SP, Brazil	Empresa Brasileira de Pesquisa Agropecuaria (EMBRAPA); Universidade Federal de Sao Carlos	Cardoso, RM; Correa, DS (corresponding author), Embrapa Instrumentacao, Nanotechnol Natl Lab Agr LNNA, BR-13560970 Sao Carlos, SP, Brazil.	rcardosoq@gmail.com; daniel.correa@embrapa.br	Correa, Daniel S/B-5660-2008; Migliorini, Fernanda/I-5611-2013	Correa, Daniel S/0000-0002-5592-0627; Migliorini, Fernanda/0000-0002-9605-2790	Fundacao de Amparo `a Pesquisa do Estado de Sao Paulo (FAPESP) [2018/22214-6, 2020/14946-7, 2017/20973-4, 2017/21791-7, 20/10048-4]; MCTI-SisNano; Conselho Nacional de Desenvolvimento Cientifico e Tecnologico (CNPq); Rede Agronano-EMBRAPA from Brazil; Fundacao de Amparo a Pesquisa do Estado de Sao Paulo (FAPESP) [20/10048-4] Funding Source: FAPESP	Fundacao de Amparo `a Pesquisa do Estado de Sao Paulo (FAPESP)(Fundacao de Amparo a Pesquisa do Estado de Sao Paulo (FAPESP)); MCTI-SisNano; Conselho Nacional de Desenvolvimento Cientifico e Tecnologico (CNPq)(Conselho Nacional de Desenvolvimento Cientifico e Tecnologico (CNPQ)); Rede Agronano-EMBRAPA from Brazil(Empresa Brasileira de Pesquisa Agropecuaria (EMBRAPA)); Fundacao de Amparo a Pesquis…	The authors acknowledge the financial support from Fundacao de Amparo `a Pesquisa do Estado de Sao Paulo (FAPESP) (Grant numbers: 2018/22214-6, 2020/14946-7; 2017/20973-4, 2017/21791-7; 20/ 10048-4), Conselho Nacional de Desenvolvimento Cientifico e Tecnologico (CNPq), MCTI-SisNano, and Rede Agronano-EMBRAPA from Brazil		57	0	0	7	7	PERGAMON-ELSEVIER SCIENCE LTD	OXFORD	THE BOULEVARD, LANGFORD LANE, KIDLINGTON, OXFORD OX5 1GB, ENGLAND	0013-4686	1873-3859		ELECTROCHIM ACTA	Electrochim. Acta	2023-02-20	2023	442
J	Asiri, SA				Asiri, Saeed A.			Smart solutions for monitoring, control, and safety of swimming pools using a savvy boat	MEASUREMENT & CONTROL			English	Article						The internet of things; savvy boat; pool safety; maintenance; pH level; wireless sensors and actuators; digital screen	CHLORINE	The Internet of Things has evolved as one of the most promising evolutional technologies, and it is gradually being recognized as a quotidian life necessity. It is based on the interconnection of several devices with the goal of simplifying everyday operations through monitoring, remote control, or the creation of smart environments with the goal of reducing the need for human interaction. This p…	[Asiri, Saeed A.] King Abdulaziz Univ, Engn Coll, Jeddah, Saudi Arabia	King Abdulaziz University	Asiri, SA (corresponding author), King Abdulaziz Univ, Fac Engn Coll, POB 80204, Jeddah 21589, Saudi Arabia.	saeed@asiri.net	Asiri, Dr. Saeed Ahmed/S-9098-2016; Asiri, Saeed Ahmed/ABA-1230-2021	Asiri, Dr. Saeed Ahmed/0000-0002-2551-7677; Asiri, Saeed Ahmed/0000-0002-2551-7677					21	0	0	1	1	SAGE PUBLICATIONS LTD	LONDON	1 OLIVERS YARD, 55 CITY ROAD, LONDON EC1Y 1SP, ENGLAND	0020-2940	2051-8730		MEAS CONTROL-UK	Meas. Control	JUL	2022	55	2023-07-08
J	Berman, I; Zereik, E; Kapitonov, A; Bonsignorio, F; Khassanov, A; Oripova, A; Lonshakov, S; Bulatov, V				Berman, Ivan; Zereik, Enrica; Kapitonov, Aleksandr; Bonsignorio, Fabio; Khassanov, Alisher; Oripova, Aziza; Lonshakov, Sergei; Bulatov, Vitaly			Trustable Environmental Monitoring by Means of Sensors Networks on Swarming Autonomous Marine Vessels and Distributed Ledger Technology	FRONTIERS IN ROBOTICS AND AI			English	Article						unmanned surface vessel; robonomics; environmental monitoring; belief space planning; boids model; blockchain; mobile sensors; water quality	QUALITY; POLLUTION; SYSTEM; RISK	The article describes a highly trustable environmental monitoring system employing a small scalable swarm of small-sized marine vessels equipped with compact sensors and intended for the monitoring of water resources and infrastructures. The technological foundation of the process which guarantees that any third party can not alter the samples taken by the robot swarm is based on the Robonomics p…	[Berman, Ivan; Kapitonov, Aleksandr] ITMO Univ, Fac Control Syst & Robot, St Petersburg, Russia; [Zereik, Enrica] Italian Natl Res Council, Inst Marine Engn, Genoa, Italy; [Bonsignorio, Fabio] Heron Robots, Genoa, Italy; [Khassanov, Alisher; Lonshakov, Sergei] Airalab, Tolyatti, Russia; [Oripova, Aziza] ITMO Univ, Fac Food Biotechnol & Engn, St Petersburg, Russia; [Bulatov, Vitaly] M2M Econ Inc M…	ITMO University; Consiglio Nazionale delle Ricerche (CNR); Istituto di Ingegneria del Mare (INM-CNR); ITMO University	Berman, I (corresponding author), ITMO Univ, Fac Control Syst & Robot, St Petersburg, Russia.	iaberman@itmo.ru	Oripova, Aziza/AIC-6584-2022; Zereik, Enrica/AAR-7875-2020; Bonsignorio, Fabio/R-7078-2019	Oripova, Aziza/0000-0003-0570-5096; Zereik, Enrica/0000-0001-6380-3554; Bonsignorio, Fabio/0000-0002-5802-2814; Berman, Ivan/0000-0001-7657-6530	Russian Science Foundation [19-19-00403]; Russian Science Foundation [19-19-00403] Funding Source: Russian Science Foundation	Russian Science Foundation(Russian Science Foundation (RSF)); Russian Science Foundation(Russian Science Foundation (RSF))	This work was supported by the Russian Science Foundation grant (project 19-19-00403).		47	5	5	1	12	FRONTIERS MEDIA SA	LAUSANNE	AVENUE DU TRIBUNAL FEDERAL 34, LAUSANNE, CH-1015, SWITZERLAND	2296-9144			FRONT ROBOT AI	Front. Robot. AI	2023-05-28	2020	7
J	Tai, HJ; Ding, QS; Zeng, LH; Liu, SY; Li, DL				Tai, Haijiang; Ding, Qisheng; Zeng, Lihua; Liu, Shuangyin; Li, Daoliang			An Intelligent Ammonia Sensor Based on Multi-Parameter for Aquaculture	SENSOR LETTERS			English	Article						Intelligent Ammonia Sensor; Multi-Parameter; Aquaculture		This paper presents an intelligent ammonia sensor based on multi-parameter for aquaculture. Against the ammonia sensors based on the electrochemistry have the problems of complex detection process, high cost of use and maintenance and difficult to realize quick measurement in situ, according to the solution of intelligent sensor, a sensor which integrates Ammonia sensitive, Ammonia ion, pH and te…	[Tai, Haijiang; Ding, Qisheng; Zeng, Lihua; Liu, Shuangyin; Li, Daoliang] China Agr Univ, China EU Ctr Informat & Commun Technol Agr, Beijing 100083, Peoples R China; [Tai, Haijiang; Ding, Qisheng; Zeng, Lihua; Liu, Shuangyin; Li, Daoliang] Beijing Engn & Technol Res Ctr Internet Things Ag, Beijing 100083, Peoples R China; [Tai, Haijiang; Ding, Qisheng; Zeng, Lihua; Liu, Shuangyin; Li, Daoliang] …	China Agricultural University; Ministry of Agriculture & Rural Affairs; Jiangsu Normal University; Hebei Agricultural University; Guangdong Ocean University	Li, DL (corresponding author), China Agr Univ, China EU Ctr Informat & Commun Technol Agr, Beijing 100083, Peoples R China.	dliangl@cau.edu.cn	Zeng, Lihua/AAS-4264-2021		Development and Applications of sensor network applied to monitor bloom of blue-green algae in Taihu Lake [2010ZX03006-006]; National Science and Technology Support Program of China [2011BAD21B01]	Development and Applications of sensor network applied to monitor bloom of blue-green algae in Taihu Lake; National Science and Technology Support Program of China	The authors would like to thank Development and Applications of sensor network applied to monitor bloom of blue-green algae in Taihu Lake (2010ZX03006-006), and the National Science and Technology Support Program of China (2011BAD21B01), for their financial support of this research.		14	3	3	8	56	AMER SCIENTIFIC PUBLISHERS	VALENCIA	26650 THE OLD RD, STE 208, VALENCIA, CA 91381-0751 USA	1546-198X	1546-1971		SENSOR LETT	Sens. Lett.	JUN-JUL	2013	11	2023-06-07
J	Benettin, P; van Breukelen, BM				Benettin, Paolo; van Breukelen, Boris M.			Decomposing the Bulk Electrical Conductivity of Streamflow To Recover Individual Solute Concentrations at High Frequency	ENVIRONMENTAL SCIENCE & TECHNOLOGY LETTERS			English	Article							ACCESSIBLE DATA RESOURCE; QUALITY TIME-SERIES; WATER-QUALITY; PERIODIC-TABLE; NATURAL-WATERS; WALES; PRECIPITATION; CATCHMENTS; PLYNLIMON; HYDROLOGY	The ability to evaluate stream hydrochemistry is often constrained by the capacity to sample streamwater at an adequate frequency. While technology is no longer a limiting factor, costs and sample management can still be a barrier to high-resolution water quality instrumentation. We propose a new framework for investigating the electrical conductivity (EC) of streamwater, which can be measured co…	[Benettin, Paolo] Ecole Polytech Fed Lausanne, Lab Ecohydrol ENAC IIE ECHO, CH-1004 Lausanne, Switzerland; [van Breukelen, Boris M.] Delft Univ Technol, Fac Civil Engn & Geosci, Dept Water Management, NL-2628 CN Delft, Netherlands	Swiss Federal Institutes of Technology Domain; Ecole Polytechnique Federale de Lausanne; Delft University of Technology	Benettin, P (corresponding author), Ecole Polytech Fed Lausanne, Lab Ecohydrol ENAC IIE ECHO, CH-1004 Lausanne, Switzerland.	paolo.benettin@epfl.ch	Benettin, Paolo/O-5063-2017	Benettin, Paolo/0000-0001-7556-1417; van Breukelen, Boris/0000-0001-9642-1077	Delft University of Technology (TU Delft); ENAC school of the Ecole Polytechinque Federale de Lausanne (EPFL)	Delft University of Technology (TU Delft); ENAC school of the Ecole Polytechinque Federale de Lausanne (EPFL)	Water quality data from the Upper Hafren catchment are available from the Center for the Environment (CEH) through the data portal. B.M.v.B. thanks the Delft University of Technology (TU Delft) for direct funding. P.B. thanks the ENAC school of the Ecole Polytechinque Federale de Lausanne (EPFL) for financial support. The authors thank Andrea Rinaldo and Scott Bailey for useful comments on an ear…		29	9	9	1	17	AMER CHEMICAL SOC	WASHINGTON	1155 16TH ST, NW, WASHINGTON, DC 20036 USA	2328-8930			ENVIRON SCI TECH LET	Environ. Sci. Technol. Lett.	DEC	2017	4	12
J	Shabani, F; Philamore, H; Matsuno, F				Shabani, Farhad; Philamore, Hemma; Matsuno, Fumitoshi			An Energy-Autonomous Chemical Oxygen Demand Sensor Using a Microbial Fuel Cell and Embedded Machine Learning	IEEE ACCESS			English	Article						Microbial fuel cells; bio-sensing; energy autonomy; machine learning	WATER; PERFORMANCE; BIOSENSOR	The current methods of water quality monitoring tend to be costly, labor-intensive, and off-site. Also, they are not energetically sustainable and often require environmentally damaging power sources such as batteries. Microbial fuel cell (MFC) technology is a promising sustainable alternative to combat these issues due to its low cost, eco-friendly energy generation, and bio-sensing features. Ex…	[Shabani, Farhad; Matsuno, Fumitoshi] Kyoto Univ, Dept Mech Engn & Sci, Kyoto 6068501, Japan; [Philamore, Hemma] Univ Bristol, Dept Engn Math, Bristol BS8 1TH, Avon, England	Kyoto University; RLUK- Research Libraries UK; University of Bristol	Shabani, F (corresponding author), Kyoto Univ, Dept Mech Engn & Sci, Kyoto 6068501, Japan.	shabani.farhad.33c@st.kyoto-u.ac.jp		Matsuno, Fumitoshi/0000-0001-9685-3267; SHABANI, FARHAD/0000-0002-5700-3742					34	1	1	1	21	IEEE-INST ELECTRICAL ELECTRONICS ENGINEERS INC	PISCATAWAY	445 HOES LANE, PISCATAWAY, NJ 08855-4141 USA	2169-3536			IEEE ACCESS	IEEE Access		2021	9
J	Ren, W; Mura, S; Irudayaraj, JMK				Ren, Wen; Mura, Stefania; Irudayaraj, Joseph M. K.			Modified graphene oxide sensors for ultra-sensitive detection of nitrate ions in water	TALANTA			English	Article						Graphene oxide; Nitrate ions; Gold nanoparticles; Absorption spectroscopy; High sensitivity	SPECTROSCOPIC DETECTION; LIQUID-CHROMATOGRAPHY; SELECTIVE DETECTION; GOLD NANOPARTICLES; MASS-SPECTROMETRY; NITRITE; SIZE; GROUNDWATER; ENRICHMENT; REDUCTION	Nitrate ions is a very common contaminant in drinking water and has a significant impact on the environment, necessitating routine monitoring. Due to its chemical and physical properties, it is hard to directly detect nitrate ions with high sensitivity in a simple and inexpensive manner. Herein with amino group modified graphene oxide (GO) as a sensing element, we show a direct and ultra-sensitiv…	[Ren, Wen; Irudayaraj, Joseph M. K.] Purdue Univ, Bindley Biosci Ctr, Dept Agr & Biol Engn, W Lafayette, IN 47907 USA; [Mura, Stefania] Univ Sassari, Porto Conte Ric, I-07041 Loc Tramariglio, Alghero, Italy	Purdue University System; Purdue University; Purdue University West Lafayette Campus; Porto Conte Ricerche; University of Sassari	Irudayaraj, JMK (corresponding author), Purdue Univ, Bindley Biosci Ctr, Dept Agr & Biol Engn, W Lafayette, IN 47907 USA.	josephi@purdue.edu		Irudayaraj, Joseph/0000-0002-0630-1520; Ren, Wen/0000-0002-8712-190X	USDA-ARS [1935-42000-049-00D]; NIH-NIEHS [R01 ES017066-03]	USDA-ARS(United States Department of Agriculture (USDA)USDA Agricultural Research Service); NIH-NIEHS(United States Department of Health & Human ServicesNational Institutes of Health (NIH) - USANIH National Institute of Environmental Health Sciences (NIEHS))	Part of the funding for this work was provided by the USDA-ARS Grant (1935-42000-049-00D) and the NIH-NIEHS award (R01 ES017066-03). We are thankful to Pushpak Bhandari, Jing Liu, and Zhongwu Zhou for their assistance.		32	32	33	0	113	ELSEVIER SCIENCE BV	AMSTERDAM	PO BOX 211, 1000 AE AMSTERDAM, NETHERLANDS	0039-9140	1873-3573		TALANTA	Talanta	2023-10-01	2015	143
J	Izadyar, A; Arachchige, DR; Cornwell, H; Hershberger, JC				Izadyar, Anahita; Arachchige, Dinusha Ranawaka; Cornwell, Hayden; Hershberger, John C.			Ion transfer stripping voltammetry for the detection of nanomolar levels of fluoxetine, citalopram, and sertraline in tap and river water samples	SENSORS AND ACTUATORS B-CHEMICAL			English	Article						Ion transfer stripping voltammetry (ITSV); Ion selective electrodes (ISEs); Double-polymer-modified pencil lead electrode; Selective serotonin reuptake inhibitors (SSRIs); Fluoxetine; Citalopram; Sertraline; Lipophilicity of drugs	SEROTONIN REUPTAKE INHIBITORS; NUCLEAR-PORE COMPLEX; BLOCKER PROPRANOLOL; LIQUID-MEMBRANE; DETECTION LIMIT; QUALITY-CONTROL; ELECTRODE; SENSOR; QUANTIFICATION; LIPOPHILICITY	The ion transfer stripping voltammetry (ITSV) technique is used to detect selective serotonin reuptake inhibitors (SSRIs) such as fluoxetine (Prozac (R)), citalopram (Celexa (R)), and sertraline (Zoloft (R)) in drinking and river water. These are common antidepressants that become highly toxic contaminants when they get into the drinking water. In this work we applied ITSV to detect the SSRIs in …	[Izadyar, Anahita; Arachchige, Dinusha Ranawaka; Cornwell, Hayden; Hershberger, John C.] Arkansas State Univ, Dept Chem & Phys, State Univ, AR 72467 USA	Arkansas State University	Izadyar, A (corresponding author), Arkansas State Univ, Dept Chem & Phys, POB 419, State Univ, AR 72467 USA.	aizadyar@astate.edu		Ranawaka Arachchige, Dinusha/0000-0002-0860-0065	Arkansas Science and Technology Authority [15-B-06]	Arkansas Science and Technology Authority	Funding for this study was provided by the Arkansas Science and Technology Authority, grant # 15-B-06 to A.I. We thank Dr. Erno Lindner Professor of Chemistry at Department of Biomedical Engineering at the University of Memphis, for valuable discussion, and also Dr. Jennifer L. Bouldin, Director of the Ecotoxicology Research Facility at Arkansas State University, for providing the river water sam…		45	37	38	0	53	ELSEVIER SCIENCE SA	LAUSANNE	PO BOX 564, 1001 LAUSANNE, SWITZERLAND	0925-4005			SENSOR ACTUAT B-CHEM	Sens. Actuator B-Chem.	FEB	2016	223
J	Wong, A; Santos, AM; Alves, RD; Vicentini, FC; Fatibello, O; Sotomayor, MDT				Wong, Ademar; Santos, Anderson Martin; Alves, Rafael da Fonseca; Vicentini, Fernando Campanha; Fatibello-Filho, Orlando; Taboada Sotomayor, Maria Del Pilar			Simultaneous determination of direct yellow 50, tryptophan, carbendazim, and caffeine in environmental and biological fluid samples using graphite pencil electrode modified with palladium nanoparticles	TALANTA			English	Article						Graphite pencil electrode; Emerging pollutants; River water and urine samples; Modified electrode; Palladium nanoparticles	SIMULTANEOUS ELECTROCHEMICAL DETECTION; VOLTAMMETRIC DETERMINATION; EMERGING POLLUTANTS; OXIDE COMPOSITE; SENSOR; SEROTONIN; GRAPHENE; SERUM; WATER; PERFORMANCE	The present study reports the development of graphite pencil electrode modified with palladium nanoparticles (PdNPs) and its application as an electrochemical sensor for the simultaneous detection of direct yellow 50, tryptophan, carbendazim and caffeine in river water and synthetic urine samples. The combination involving the conductive surface of the graphite pencil electrode (GPE) and the enla…	[Wong, Ademar; Alves, Rafael da Fonseca; Taboada Sotomayor, Maria Del Pilar] State Univ Sao Paulo, Inst Chem, Dept Analyt Chem, Araraquara, SP, Brazil; [Wong, Ademar; Santos, Anderson Martin; Fatibello-Filho, Orlando] Univ Fed Sao Carlos, Dept Chem, Rod Washington Luis Km 235, Sao Carlos, SP, Brazil; [Vicentini, Fernando Campanha] Univ Fed Sao Carlos, Ctr Nat Sci, Rod Lauri Simoes Barros Km 12, B…	Universidade Estadual Paulista; Universidade Federal de Sao Carlos; Universidade Federal de Sao Carlos	Wong, A (corresponding author), State Univ Sao Paulo, Inst Chem, Dept Analyt Chem, Araraquara, SP, Brazil.;Vicentini, FC (corresponding author), Univ Fed Sao Carlos, Ctr Nat Sci, Rod Lauri Simoes Barros Km 12, Buri, SP, Brazil.	ademar.wong@hotmail.com; fcvicentini@ufscar.br	Santos, Anderson Martin/Q-4062-2019; Vicentini, Fernando Campanhã/I-2114-2013; Alves, Rafael F./P-3427-2018; Sotomayor, Maria/M-6317-2013; Wong, Ademar/AAE-2214-2019	Santos, Anderson Martin/0000-0003-4067-9671; Vicentini, Fernando Campanhã/0000-0001-6075-2579; Sotomayor, Maria/0000-0002-6173-7888; Wong, Ademar/0000-0002-1249-1367	Conselho Nacional de Desenvolvimento Cientifico e Tecnologico -CNPq [150184/2019-0, 405546/2018-1, 408430/2016-8]; FAPESP [2014/50945-4, 2019/00677-7, 2020/01050-5]; CAPES [0674/2018]	Conselho Nacional de Desenvolvimento Cientifico e Tecnologico -CNPq(Conselho Nacional de Desenvolvimento Cientifico e Tecnologico (CNPQ)); FAPESP(Fundacao de Amparo a Pesquisa do Estado de Sao Paulo (FAPESP)); CAPES(Coordenacao de Aperfeicoamento de Pessoal de Nivel Superior (CAPES))	The authors are grateful to Conselho Nacional de Desenvolvimento Cientifico e Tecnologico -CNPq (grant numbers 150184/2019-0, 405546/2018-1 and 408430/2016-8), FAPESP (grant numbers 2014/50945-4, 2019/00677-7 and 2020/01050-5) and CAPES (PROJ. AUX/PE/PROEX No 0674/2018) for the financial support granted in the course of this research.		60	29	30	4	79	ELSEVIER	AMSTERDAM	RADARWEG 29, 1043 NX AMSTERDAM, NETHERLANDS	0039-9140	1873-3573		TALANTA	Talanta	2023-01-15	2021	222
J	Jo, B; Baloch, Z				Jo, Byungwan; Baloch, Zafar			Internet of Things-Based Arduino Intelligent Monitoring and Cluster Analysis of Seasonal Variation in Physicochemical Parameters of Jungnangcheon, an Urban Stream	WATER			English	Article						Arduino monitoring; urban stream; data analysis; clustering technique; internet of things	RIVER-BASIN; WATER	In the present case study, the use of an advanced, efficient and low-cost technique for monitoring an urban stream was reported. Physicochemical parameters (PcPs) of Jungnangcheon stream (Seoul, South Korea) were assessed using an Internet of Things (IoT) platform. Temperature, dissolved oxygen (DO), and pH parameters were monitored for the three summer months and the first fall month at a fixed …	[Jo, Byungwan; Baloch, Zafar] Hanyang Univ, Dept Civil & Environm Engn, Jae Sung Civil Engn Bldg,222 Wasgsimini Ro, Seoul 04763, South Korea; [Baloch, Zafar] BUITEMS, Dept Civil Engn, Fac Engn & Architecture, Quetta 87650, Balochistan, Pakistan	Hanyang University; Balochistan University of Information Technology, Engineering & Management Sciences BUITEMS	Baloch, Z (corresponding author), Hanyang Univ, Dept Civil & Environm Engn, Jae Sung Civil Engn Bldg,222 Wasgsimini Ro, Seoul 04763, South Korea.;Baloch, Z (corresponding author), BUITEMS, Dept Civil Engn, Fac Engn & Architecture, Quetta 87650, Balochistan, Pakistan.	joycon@hanmail.net; engr.zafarbaloch@gmail.com	Baloch, Zafar/D-7189-2014	Baloch, Zafar/0000-0003-1314-3070					31	4	4	2	12	MDPI	BASEL	ST ALBAN-ANLAGE 66, CH-4052 BASEL, SWITZERLAND		2073-4441		WATER-SUI	Water	MAR	2017	9	3
J	Lake, MW				Lake, MW			Feasibility study and preliminary design of a channel buoy mounted oil sensor system	MARINE TECHNOLOGY AND SNAME NEWS			English	Article								Due to high vessel traffic and the presence of industry, oil pollution is often an overwhelming menace. Oil spills potentially may remain undetected for long periods of time, despite routine surveillance by the Coat Guard and other environmental agencies. A Channel Buoy Mounted Oil Sensor System capable of warning oil spill response units of the presence of oil immediately after a spill occurs wo…	US COAST GUARD ACAD,DEPT ENGN,NEW LONDON,CT										20	1	1	0	0	SOC NAVAL ARCH MARINE ENG	JERSEY CITY	601 PAVONIA AVENUE, JERSEY CITY, NJ 07306	0025-3316			MAR TECHNOL SNAME N	Mar. Technol. Sname News	JAN	1996	33	1
J	Cheng, SY; Yuan, SL; Wu, XY; Lei, T; Ji, JL; Yin, YH; Liu, YQ; Liu, CS; Zhang, YK; Zhu, Y				Cheng, Shiyang; Yuan, Siliang; Wu, Xinyue; Lei, Teng; Ji, Jiali; Yin, Yuhan; Liu, Yunqi; Liu, Chunsheng; Zhang, Yongkang; Zhu, Ya			Identification of Chemicals Based on Locomotor Tracks of Daphnia magna Using Deep Learning	ENVIRONMENTAL SCIENCE & TECHNOLOGY LETTERS			English	Article; Early Access						Convolutional neural networks; Daphnia magna; Chemical identification; Locomotor behavior; Deep learning	RIVER-BASIN SCALE; AQUATIC ENVIRONMENT; FATE	Water pollution poses significant risks to society and human health, necessitating the development of low-cost and environmentally friendly methods for identifying various pollutants. Artificial intelligence has the potential to be a valuable tool in this regard. Locomotor behavior is a complex integration of physiological, sensory, nervous, and muscular systems. Organisms exhibit unique locomoto…	[Cheng, Shiyang] China Univ Min & Technol, Sch Environm Sci & Spatial Informat, Xuzhou 221116, Peoples R China; [Yuan, Siliang] Chinese Acad Sci, Inst Hydrobiol, Wuhan 430072, Peoples R China; [Wu, Xinyue] Zhejiang Univ, Dept Environm Sci, Zhejiang Prov Key Lab Organ Pollut Proc & Control, Hangzhou 310058, Peoples R China; [Liu, Chunsheng; Zhang, Yongkang] China Univ Geosci, Sch Environm Studies,…	China University of Mining & Technology; Chinese Academy of Sciences; Institute of Hydrobiology, CAS; Zhejiang University; China University of Geosciences; Wenzhou Medical University	Zhang, YK (corresponding author), China Univ Geosci, Sch Environm Studies, Wuhan 430079, Peoples R China.;Zhu, Y (corresponding author), Wenzhou Med Univ, Sch Publ Hlth & Management, Wenzhou 325035, Peoples R China.	ykzhang0714@163.com; zhuya@wmu.edu.cn		ZHU, YA/0000-0001-8987-2048	Wenzhou Municipal Science and Technology Bureau, China [Y20210031]; China Post-doctoral Science Foundation [2022M713320, 2022M721273]	Wenzhou Municipal Science and Technology Bureau, China; China Post-doctoral Science Foundation(China Postdoctoral Science Foundation)	This study was supported by Wenzhou Municipal Science and Technology Bureau, China (Y20210031) , and China Post-doctoral Science Foundation (2022M713320 and 2022M721273) .		33	0	0	1	1	AMER CHEMICAL SOC	WASHINGTON	1155 16TH ST, NW, WASHINGTON, DC 20036 USA	2328-8930			ENVIRON SCI TECH LET	Environ. Sci. Technol. Lett.	2023-03-22	2023
J	Ciampittiello, M; Manca, D; Dresti, C; Grisoni, S; Lami, A; Saidi, H				Ciampittiello, Marzia; Manca, Dario; Dresti, Claudia; Grisoni, Stefano; Lami, Andrea; Saidi, Helmi			Meteo-Hydrological Sensors within the Lake Maggiore Catchment: System Establishment, Functioning and Data Validation	SENSORS			English	Article						hydro-meteorological stations; sensors; web services; PITAGORA project	ARCHITECTURE; METADATA	Climate change and human activities have a strong impact on lakes and their catchments, so to understand ongoing processes it is fundamental to monitor environmental variables with a spatially well-distributed and high frequency network and efficiently share data. An effective sharing and interoperability of environmental information between technician and end-user fosters an in-depth knowledge o…	[Ciampittiello, Marzia; Manca, Dario; Dresti, Claudia; Grisoni, Stefano; Lami, Andrea; Saidi, Helmi] CNR, Water Res Inst, I-28922 Verbania, Italy	Consiglio Nazionale delle Ricerche (CNR); Istituto di Ricerca sulle Acque (IRSA-CNR)	Saidi, H (corresponding author), CNR, Water Res Inst, I-28922 Verbania, Italy.	marzia.ciampittiello@irsa.cnr.it; dario.manca@cnr.it; claudia.dresti@irsa.cnr.it; grisoni.stefano@gmail.com; andrea.lami@irsa.cnr.it; helmi.saidi@irsa.cnr.it	Dresti, Claudia/ITT-6857-2023; Saidi, Helmi/AID-7123-2022; Lami, Andrea/F-1415-2013; Saidi, Helmi/M-3880-2016	Dresti, Claudia/0000-0002-0666-1278; Lami, Andrea/0000-0003-3627-0363; Saidi, Helmi/0000-0002-8437-0249; Ciampittiello, Marzia/0000-0001-6403-0493					64	2	2	0	6	MDPI	BASEL	ST ALBAN-ANLAGE 66, CH-4052 BASEL, SWITZERLAND		1424-8220		SENSORS-BASEL	Sensors	DEC	2021	21	24
J	Facure, MHM; Mercante, LA; Correa, DS				Facure, Murilo H. M.; Mercante, Luiza A.; Correa, Daniel S.			Polyacrylonitrile/Reduced Graphene Oxide Free-Standing Nanofibrous Membranes for Detecting Endocrine Disruptors	ACS APPLIED NANO MATERIALS			English	Article						endocrine-disrupting chemicals; electrical impedance spectroscopy; impedimetric sensor; electrospinning; rGO; electrospun nanofibers; 17 alpha-ethinylestradiol	CARBON NANOTUBES; REDUCTION; SENSOR; 17-ALPHA-ETHINYLESTRADIOL; FILMS; ARCHITECTURES; POLYPYRROLE; ADSORPTION; EXPOSURE; WATER	Endocrine-disrupting chemicals (EDCs) are emerging pollutants whose uncontrolled release in natural aquatic environments can pose risks to human and animal health. In this scenario, the development of simple, low-cost, and sensitive methods to detect trace amounts of EDCs in the environment is highly sought. In this work, a nanofiber-based sensor was fabricated by functionalizing a polyacrylonitr…	[Facure, Murilo H. M.; Correa, Daniel S.] Embrapa Instrumentacao, Nanotechnol Natl Lab Agr LNNA, BR-13560970 Sao Carlos, Brazil; [Facure, Murilo H. M.; Correa, Daniel S.] Fed Univ Sao Carlos UFSCar, Ctr Exact Sci & Technol, PPGQ, Dept Chem, BR-13565905 Sao Carlos, Brazil; [Mercante, Luiza A.] Fed Univ Bahia UFBA, Chem Inst, BR-40170115 Salvador, BA, Brazil	Empresa Brasileira de Pesquisa Agropecuaria (EMBRAPA); Universidade Federal de Sao Carlos	Correa, DS (corresponding author), Embrapa Instrumentacao, Nanotechnol Natl Lab Agr LNNA, BR-13560970 Sao Carlos, Brazil.;Correa, DS (corresponding author), Fed Univ Sao Carlos UFSCar, Ctr Exact Sci & Technol, PPGQ, Dept Chem, BR-13565905 Sao Carlos, Brazil.	daniel.correa@embrapa.br	Facure, Murilo Henrique Moreira/U-5414-2018; Mercante, Luiza/I-9008-2012; Correa, Daniel S/B-5660-2008	Facure, Murilo Henrique Moreira/0000-0003-0858-0364; Mercante, Luiza/0000-0003-4206-6545; Correa, Daniel S/0000-0002-5592-0627	FAPESP [2018/22214-6, 2017/10582-8]; CNPq; MCTI-SisNano [CNPq/402.287/2013-4]; Rede Agronano (EMBRAPA)	FAPESP(Fundacao de Amparo a Pesquisa do Estado de Sao Paulo (FAPESP)); CNPq(Conselho Nacional de Desenvolvimento Cientifico e Tecnologico (CNPQ)); MCTI-SisNano; Rede Agronano (EMBRAPA)(Empresa Brasileira de Pesquisa Agropecuaria (EMBRAPA))	The authors thank the financial support from FAPESP (2018/22214-6, 2017/10582-8), the CNPq, the MCTI-SisNano (CNPq/402.287/2013-4), and Rede Agronano (EMBRAPA). The authors also thank Dr. Valmor Mastelaro (IFSC-USP) for the XPS measurements.		61	3	3	9	19	AMER CHEMICAL SOC	WASHINGTON	1155 16TH ST, NW, WASHINGTON, DC 20036 USA		2574-0970		ACS APPL NANO MATER	ACS Appl. Nano Mater.	2023-05-27	2022	5	5
J	Yu, YM; Duan, QX; Zhang, X; Li, XW; Wang, K; Liu, CY; Zhu, BC				Yu, Yamin; Duan, Qingxia; Zhang, Xue; Li, Xiwei; Wang, Kun; Liu, Caiyun; Zhu, Baocun			A Highly Selective and Ultrasensitive Fluorescent Probe for Monitoring Hg2+ and Its Applications in Real Water Samples	ANALYTICAL SCIENCES			English	Article						Mercury ions; fluorescent probe; rhodol; thiocarbamate	HYPOCHLOROUS ACID; AQUEOUS-SOLUTION; MERCURY IONS; BENZOTHIAZOLE; CHEMODOSIMETER; HG(II); SENSOR; CELLS; CHEMOSENSORS; COMPLEX	Mercury ions as high toxic pollutants have received wide-spread attention because of their poisonousness, persistence and enrichment. To better understand the distribution of mercury species and supplement more detailed toxicological research, it is necessary to develop some methods for monitoring mercury ions with high sensitivity and selectivity. Therefore, a simple rhodol-based highly selectiv…	[Yu, Yamin; Duan, Qingxia; Zhang, Xue; Li, Xiwei; Wang, Kun; Liu, Caiyun; Zhu, Baocun] Univ Jinan, Sch Water Conservancy & Environm, Shandong Prov Engn Technol Res Ctr Ecol Carbon Si, Jinan 250022, Shandong, Peoples R China	University of Jinan	Liu, CY (corresponding author), Univ Jinan, Sch Water Conservancy & Environm, Shandong Prov Engn Technol Res Ctr Ecol Carbon Si, Jinan 250022, Shandong, Peoples R China.	liucaiyun1982072@163.com			National Natural Science Foundation of China [21607053, 21777053]; Shandong Provincial Natural Science Foundation [ZR2017MB014]	National Natural Science Foundation of China(National Natural Science Foundation of China (NSFC)); Shandong Provincial Natural Science Foundation(Natural Science Foundation of Shandong Province)	We gratefully acknowledge financial support from the National Natural Science Foundation of China (21607053 and 21777053), and Shandong Provincial Natural Science Foundation (ZR2017MB014).		36	3	3	7	34	JAPAN SOC ANALYTICAL CHEMISTRY	TOKYO	26-2 NISHIGOTANDA 1 CHOME SHINAGAWA-KU, TOKYO, 141, JAPAN	0910-6340	1348-2246		ANAL SCI	Anal. Sci.	NOV	2019	35	11
J	El-Desoky, HS; Beltagi, AM; Ghoneim, MM; El-Hadad, AI				El-Desoky, Hanaa S.; Beltagi, Amr M.; Ghoneim, Mohamed M.; El-Hadad, Ahmed, I			The first utilization of graphene nano-sheets and synthesized Fe3O4 nanoparticles as a synergistic electrodeposition platform for simultaneous voltammetric determination of some toxic heavy metal ions in various real environmental water samples	MICROCHEMICAL JOURNAL			English	Article						Magnetite; Graphene; Electrochemical sensor; Anodic stripping voltammetry; Water analysis; Pb; Bi; Cu heavy metal ions	ANODIC-STRIPPING VOLTAMMETRY; ATOMIC EMISSION-SPECTROMETRY; TRACE AMOUNTS; LEAD; BISMUTH; COPPER; CADMIUM; ZINC; CHEMISTRY; ANTIMONY	An environmentally-friendly, inexpensive, and high-throughput method was developed for the simultaneous determination of three important heavy metal ions including Pb(II), Bi(III) and Cu(II). Those can cause synergistic toxicological effects in animals and humans. Magnetite (Fe3O4) nanoparticles were synthesized and characterized. A carbon paste electrode (CPE) modified with Fe3O4 NPs and graphen…	[El-Desoky, Hanaa S.; Ghoneim, Mohamed M.; El-Hadad, Ahmed, I] Tanta Univ, Fac Sci, Dept Chem, Tanta 31527, Egypt; [Beltagi, Amr M.] Kafr El Sheikh Univ, Fac Sci, Dept Chem, Kafr Al Sheikh 33616, Egypt	Egyptian Knowledge Bank (EKB); Tanta University; Egyptian Knowledge Bank (EKB); Kafrelsheikh University	El-Desoky, HS (corresponding author), Tanta Univ, Fac Sci, Dept Chem, Tanta 31527, Egypt.	hseldesoky@hotmail.com	El Hadad, Ahmed/IQR-8456-2023; beltagi, amr/GNM-6478-2022	Ghoneim, Mohammed/0000-0002-9179-4373; Beltagi, Amr/0000-0001-5526-6461					81	3	3	5	31	ELSEVIER	AMSTERDAM	RADARWEG 29, 1043 NX AMSTERDAM, NETHERLANDS	0026-265X	1095-9149		MICROCHEM J	Microchem J.	APR	2022	175
J	Droujko, J; Kunz, FK; Molnar, P				Droujko, Jessica; Kunz Jr, Felix; Molnar, Peter			otz-T: 3D-printed open-source turbidity sensor with Arduino shield for suspended sediment monitoring	HARDWAREX			English	Article						Turbidity; Data logging; Environmental sensing; Printed circuit board; Real-time clock; Rivers	DYNAMICS; DENUDATION; CATCHMENT; IMPACTS	Fine sediment production in catchments and transport through rivers to floodplains and coastal areas is extremely important for riverine, coastal and marine ecosystems, nutrient transport, global biogeochemical cycles, water quality and pollution. Due to the high cost of suspended sediment monitoring technology, it is extremely difficult to obtain a complete understanding of the physical connecti…	[Droujko, Jessica; Molnar, Peter] Swiss Fed Inst Technol, Inst Environm Engn, CH-8093 Zurich, Switzerland; [Kunz Jr, Felix] Swiss Fed Inst Technol, Inst Informat Technol & Elect Engn, CH-8092 Zurich, Switzerland	Swiss Federal Institutes of Technology Domain; ETH Zurich; Swiss Federal Institutes of Technology Domain; ETH Zurich	Droujko, J (corresponding author), Swiss Fed Inst Technol, Inst Environm Engn, CH-8093 Zurich, Switzerland.	droujko@ifu.baug.ethz.ch			ETH Research Grant [ETH-13 19-1]	ETH Research Grant	We thank Jovan Blagojevic for helping install the sensor for the field testing campaign. This research was funded by the ETH Research Grant ETH-13 19-1.		46	0	0	6	6	ELSEVIER	AMSTERDAM	RADARWEG 29, 1043 NX AMSTERDAM, NETHERLANDS		2468-0672		HARDWAREX	HardwareX	MAR	2023	13
J	Harris, N; Cranny, A; Rivers, M; Smettem, K; Barrett-Lennard, EG				Harris, Nick; Cranny, Andy; Rivers, Mark; Smettem, Keith; Barrett-Lennard, Edward G.			Application of Distributed Wireless Chloride Sensors to Environmental Monitoring: Initial Results	IEEE TRANSACTIONS ON INSTRUMENTATION AND MEASUREMENT			English	Article						Chloride sensor; environment; hydrology; screen-printed sensor; wireless sensor network	YIELD	Over the next 30 years, it is anticipated that the world will need to source 70% more food to provide for the growing population, and it is likely that a significant amount of this will have to come from irrigated land. However, the quality of irrigation water is also important, and measuring the quality of this water will allow management decisions to be made. Soil salinity is an important param…	[Harris, Nick; Cranny, Andy] Univ Southampton, Sch Elect & Comp Sci, Southampton SO17 1BJ, Hants, England; [Rivers, Mark] Univ Western Australia, Inst Agr, Crawley, WA 6009, Australia; [Smettem, Keith] Univ Western Australia, Sch Civil Environm & Min Engn, Crawley, WA 6009, Australia; [Barrett-Lennard, Edward G.] Univ Western Australia, Sch Plant Biol, Crawley, WA 6009, Australia	University of Southampton; University of Western Australia; University of Western Australia; University of Western Australia	Harris, N (corresponding author), Univ Southampton, Sch Elect & Comp Sci, Southampton SO17 1BJ, Hants, England.	nrh@ecs.soton.ac.uk	Harris, Nick/W-8693-2019; Rivers, Mark/CAJ-3456-2022; Barrett-Lennard, Edward G/D-5387-2011	Harris, Nick/0000-0003-4122-2219; Barrett-Lennard, Edward G/0000-0001-9945-1044; Smettem, Keith/0000-0003-2650-4429	UK's Biotechnology and Biological Sciences Research Council (BBSRC) [BB/J021210/1]; Worldwide Universities Network (WUN); Biotechnology and Biological Sciences Research Council [BB/J021210/1] Funding Source: researchfish; BBSRC [BB/J021210/1] Funding Source: UKRI	UK's Biotechnology and Biological Sciences Research Council (BBSRC)(UK Research & Innovation (UKRI)Biotechnology and Biological Sciences Research Council (BBSRC)); Worldwide Universities Network (WUN); Biotechnology and Biological Sciences Research Council(UK Research & Innovation (UKRI)Biotechnology and Biological Sciences Research Council (BBSRC)); BBSRC(UK Research & Innovation (UKRI)Biotechno…	This work was funded by the UK's Biotechnology and Biological Sciences Research Council (BBSRC), grant number BB/J021210/1, and by the Worldwide Universities Network (WUN). The authors would also like to thank A. Shetta who developed the initial prototype data logger as part of his MSc degree at the University of Southampton under the supervision of N. Harris and A. Cranny.		13	35	35	0	25	IEEE-INST ELECTRICAL ELECTRONICS ENGINEERS INC	PISCATAWAY	445 HOES LANE, PISCATAWAY, NJ 08855-4141 USA	0018-9456	1557-9662		IEEE T INSTRUM MEAS	IEEE Trans. Instrum. Meas.	APR	2016	65	4
J	Ebrahimi, P; Gholivand, MB				Ebrahimi, Parastoo; Gholivand, Mohammad Bagher			Introduction of a new dichlorophen electrochemical sensor relying on the modified glassy carbon electrode (GCE) with carboxyl-functionalized graphene oxide/poly (L-arginine)	JOURNAL OF SOLID STATE ELECTROCHEMISTRY			English	Article						Dichlorophen; Poly-L-arginine; Carboxyl-functionalized graphene oxide; Electrochemical determination	WATER; ADSORPTION; REMOVAL	Dichlorophen (Dcp), a harmful environmental pollutant, is broadly utilized in veterinary medications, chemical fertilizers, pesticides, cosmetics, and personal care products. The current work reports a low-cost, simple, and convenient technique to achieve an electrochemical sensor relying on the electropolymerization of poly-L-arginine (PLA) on carboxyl-functionalized graphene oxide (COOH-GO)-mod…	[Ebrahimi, Parastoo; Gholivand, Mohammad Bagher] Razi Univ, Fac Chem, Dept Analyt Chem, Kermanshah, Iran	Razi University	Gholivand, MB (corresponding author), Razi Univ, Fac Chem, Dept Analyt Chem, Kermanshah, Iran.	mbgholivand2013@gmail.com			Razi University	Razi University	The authors are thankful to Razi University for the financial support of this work.		34	0	0	1	3	SPRINGER	NEW YORK	ONE NEW YORK PLAZA, SUITE 4600, NEW YORK, NY, UNITED STATES	1432-8488	1433-0768		J SOLID STATE ELECTR	J. Solid State Electrochem.	JAN	2023	27	1
J	Zheng, TS; Bergin, MH; Hu, SJ; Miller, J; Carlson, DE				Zheng, Tongshu; Bergin, Michael H.; Hu, Shijia; Miller, Joshua; Carlson, David E.			Estimating ground-level PM2.5 using micro-satellite images by a convolutional neural network and random forest approach	ATMOSPHERIC ENVIRONMENT			English	Article						Fine particulate matter (PM2.5) prediction; Computer vision; Satellite imagery; CNN; Convolutional neural network; RF; Random forest	AEROSOL OPTICAL DEPTH; AIR-POLLUTION; CALIBRATION MODEL; GLOBAL BURDEN; RESOLUTION; IMPLEMENTATION; PERFORMANCE; PRODUCTS; DISEASE; LAND	PM2.5 poses a serious threat to public health, however its spatial concentrations are not well characterized due to the sparseness of regulatory air quality monitoring (AQM) stations. This motivates novel low-cost methods to estimate ground-level PM2.5 at a fine spatial resolution so that PM2.5 exposure in epidemiological research can be better quantified. Satellite-retrieved aerosol products are…	[Zheng, Tongshu; Bergin, Michael H.; Carlson, David E.] Duke Univ, Dept Civil & Environm Engn, 121 Hudson Hall,Sci Dr, Durham, NC 27708 USA; [Hu, Shijia; Carlson, David E.] Duke Univ, Dept Comp Sci, LSRC Bldg D101,308 Res Dr, Durham, NC 27708 USA; [Miller, Joshua] Syngenta, 9 Davis Dr, Durham, NC 27703 USA; [Carlson, David E.] Duke Univ, Dept Biostat & Bioinformat, Med Ctr, Suite 1102 Hock Plaza,…	Duke University; Duke University; Syngenta; Duke University	Zheng, TS (corresponding author), Duke Univ, Dept Civil & Environm Engn, 121 Hudson Hall,Sci Dr, Durham, NC 27708 USA.	tongshu.zheng@duke.edu		Carlson, David/0000-0003-1005-6385	Research Initiative for Real-time River Water and Air Quality Monitoring program - Department of Science and Technology, Government of India; Intel(R)	Research Initiative for Real-time River Water and Air Quality Monitoring program - Department of Science and Technology, Government of India; Intel(R)	This research has been supported under the Research Initiative for Real-time River Water and Air Quality Monitoring program funded by the Department of Science and Technology, Government of India and Intel (R). The authors would like to thank Kyle Bradbury at Duke University for suggesting the PlanetScope imagery. The authors are also grateful to the Planet Team for their Education and Research P…		58	28	28	18	89	PERGAMON-ELSEVIER SCIENCE LTD	OXFORD	THE BOULEVARD, LANGFORD LANE, KIDLINGTON, OXFORD OX5 1GB, ENGLAND	1352-2310	1873-2844		ATMOS ENVIRON	Atmos. Environ.	2023-06-01	2020	230
J	Kavazoi, HS; Martin, CS; Alessio, P				Kavazoi, Henry S.; Martin, Cibely S.; Alessio, Priscila			Comparative study of tetrasulfonated phthalocyanine modified screen-printed electrodes in paraquat	SYNTHETIC METALS			English	Article						Surface modification; River water; Pesticide; Electrochemical sensor	DIRECT ELECTROCHEMICAL DETERMINATION; PERFORMANCE LIQUID-CHROMATOGRAPHY; GLASSY-CARBON ELECTRODE; IRON PHTHALOCYANINE; VOLTAMMETRIC DETERMINATION; EMERGING POLLUTANTS; GAS-CHROMATOGRAPHY; PESTICIDES; WATER; ENVIRONMENT	Emerging pollutants, including pesticides, have been an increasing problem to human and environmental health. Based on this, the development and optimization of sensors is an essential approach to controlling emerging pollutants. Here, screen-printed carbon electrodes (SPCE) modified with three MTsPc (FeTsPc, CuTsPc, or NiTsPc) were evaluated for voltammetric detection of paraquat (PQ). UV-Vis ab…	[Kavazoi, Henry S.; Martin, Cibely S.; Alessio, Priscila] Sao Paulo State Univ UNESP, Sch Technol & Appl Sci, BR-19060900 Presidente Prudente, SP, Brazil	Universidade Estadual Paulista	Alessio, P (corresponding author), Sao Paulo State Univ UNESP, Sch Technol & Appl Sci, BR-19060900 Presidente Prudente, SP, Brazil.	priscila.alessio@unesp.br	; Alessio, Priscila/C-1716-2012	Martin, Cibely/0000-0001-5634-525X; Alessio, Priscila/0000-0002-1345-0540; Kavazoi, Henry/0000-0002-0886-5805	Sao Paulo Research Foundation (FAPESP) [2018/22214-6, 2017/06534-8, 2017/15019-0]; National Council for Scientific and Technological Development (CNPq) [422163/2018-0, 304836/2018-4]; Coordination for the Improvement of Higher Education Personnel (CAPES); National Institute for Science and Technology on Organic Electronics (INEO); CNPq [465572/2014-6]; FAPESP [2014/50869-6]; CAPES [23038.000776/2…	Sao Paulo Research Foundation (FAPESP)(Fundacao de Amparo a Pesquisa do Estado de Sao Paulo (FAPESP)); National Council for Scientific and Technological Development (CNPq)(Conselho Nacional de Desenvolvimento Cientifico e Tecnologico (CNPQ)); Coordination for the Improvement of Higher Education Personnel (CAPES)(Coordenacao de Aperfeicoamento de Pessoal de Nivel Superior (CAPES)); National Instit…	This work was financially supported by The Sao Paulo Research Foundation (FAPESP) (2018/22214-6, 2017/06534-8, 2017/15019-0) , National Council for Scientific and Technological Development (CNPq) (422163/2018-0 and 304836/2018-4) , Coordination for the Improvement of Higher Education Personnel (CAPES) , and National Institute for Science and Technology on Organic Electronics (INEO) (CNPq process …		60	2	2	2	5	ELSEVIER SCIENCE SA	LAUSANNE	PO BOX 564, 1001 LAUSANNE, SWITZERLAND	0379-6779			SYNTHETIC MET	Synth. Met.	MAR	2022	284
J	Hemond, H; Cheung, J; Mueller, A; Wong, J; Hemond, M; Mueller, D; Eskesen, J				Hemond, Harry; Cheung, Jimmy; Mueller, Amy; Wong, Joseph; Hemond, Michael; Mueller, Daniel; Eskesen, Justin			The NEREUS in-lake wireless/acoustic chemical data network	LIMNOLOGY AND OCEANOGRAPHY-METHODS			English	Article							UNDERWATER MASS-SPECTROMETER	We describe a system for the semi-autonomous in situ measurement of lake chemical properties, with high temporal resolution and the potential to map chemical properties in 3 dimensions. The system comprises both fixed sensor locations on moored buoys and one (or potentially more) autonomous underwater vehicles (AUVs) serving as mobile underwater sensor platforms. Sensors include conventional wate…	[Hemond, Harry; Cheung, Jimmy; Mueller, Amy; Wong, Joseph; Mueller, Daniel; Eskesen, Justin] MIT, Dept Civil & Environm Engn, Sea Grant AUV Lab, Cambridge, MA 02139 USA; [Hemond, Michael] Harvard Univ, Dept Biol Chem & Mol Pharmacol, Sch Med, Harvard MIT Div Hlth Sci & Technol, Boston, MA 02115 USA	Massachusetts Institute of Technology (MIT); Harvard University; Harvard Medical School	Hemond, H (corresponding author), MIT, Dept Civil & Environm Engn, Sea Grant AUV Lab, 77 Massachusetts Ave, Cambridge, MA 02139 USA.	hfhemond@mit.edu			NSF [EAR 0330272]; NIEHS [ES002109]	NSF(National Science Foundation (NSF)); NIEHS(United States Department of Health & Human ServicesNational Institutes of Health (NIH) - USANIH National Institute of Environmental Health Sciences (NIEHS))	This work was supported by NSF EAR 0330272, a pilot grant from BP, MIT Sea Grant, the W. Leonhard Chair, and NIEHS P30 ES002109. J. Morash, V. Polidoro, and R. Damus took part in vehicle construction and field testing, T. Donoghue assisted with buoy construction, L. Freitag provided the MicroModems, H. Nepf and C. Chryssostomidis are co- Pls on EAR 0330272 and provided valuable discussions, and A…		12	4	5	0	9	AMER SOC LIMNOLOGY OCEANOGRAPHY	WACO	5400 BOSQUE BLVD, STE 680, WACO, TX 76710-4446 USA	1541-5856			LIMNOL OCEANOGR-METH	Limnol. Oceanogr. Meth.	JUL	2008	6
J	Simbeye, DS; Zhao, JM; Yang, SF				Simbeye, Daudi S.; Zhao, Jimin; Yang, Shifeng			Design and deployment of wireless sensor networks for aquaculture monitoring and control based on virtual instruments	COMPUTERS AND ELECTRONICS IN AGRICULTURE			English	Article						Aquaculture; Environmental parameters; Wireless sensor network; LabWindows/CVI; Monitoring and control; ZigBee	WATER-QUALITY; SYSTEM	Aquaculture is moving toward an intensive controlled environment production with a significant increase in production, but at a cost of increased risk of catastrophic loss due to equipment or management failures. In addition, managers of intensive production facilities need accurate, real-time information on system status and performance in order to maximize their potential. This work has develop…	[Simbeye, Daudi S.; Zhao, Jimin; Yang, Shifeng] Tianjin Univ & Sci Technol, Coll Elect Informat & Automat, Tianjin 300222, Peoples R China	Tianjin University Science & Technology	Simbeye, DS (corresponding author), Tianjin Univ & Sci Technol, Coll Elect Informat & Automat, 1038 Dagu South Rd, Tianjin 300222, Peoples R China.	daudi.simbeye@gmail.com		Simbeye, Daudi/0000-0003-3576-4169	National Natural Science Foundation of China [60771014]; Tianjin Agricultural Scientific Committee Foundation [201101190]	National Natural Science Foundation of China(National Natural Science Foundation of China (NSFC)); Tianjin Agricultural Scientific Committee Foundation	This work was supported in part by the National Natural Science Foundation of China under Grant 60771014 and Tianjin Agricultural Scientific Committee Foundation under Grant 201101190.		27	58	65	1	73	ELSEVIER SCI LTD	OXFORD	THE BOULEVARD, LANGFORD LANE, KIDLINGTON, OXFORD OX5 1GB, OXON, ENGLAND	0168-1699	1872-7107		COMPUT ELECTRON AGR	Comput. Electron. Agric.	MAR	2014	102
[truncated: 72 more rows]
[truncated: 22 more columns]

## Sheet: Review_of_articles
			Details				Relevant info
Short Name	Year	Journal	Objective	Purpose/motivation for water quality monitoring	Binned purpose	Country	Sensors used	Binned Sensors	Novel sensor or off the shelf	Micro controller type	Binned Micro controller type	Data logging method	Binned data logging method	Deployment type	Deployment length	Binned Deployment length	Compared to standard equip	Calibration completed	Data analysis	Main results/conclusions	Notes/Questions	DOI	Citations
Wang, 2018	2018	IEEE SENSORS JOURNAL	Develop low-cost and accurate turbidy sensor	fresh-water quality mangament	environmental health	U.K.	turbidy	Turbidity	novel	NI myDAQ	National Instrument	NI myDAQ - computer	Computer	lab	8 hr	Less than a day	Y	Y	Relative error			10.1109/JSEN.2018.2826778
[truncated: 82 more rows]

## Sheet: Lit_Review_Details
Web of Sci	results	refined
[truncated: 5 more rows]
